# Supplementary material for: Spatial and functional organization of mitochondrial protein network
Source: PubMed Central journal article supplement — Sci Rep. 2013 Mar 7;3:1403. doi: 10.1038/srep01403 (PMC3590558; doi:10.1038/srep01403), 2013-03-07
Supplement: srep01403-s1.pdf [file srep01403-s1.pdf]

## **Supplementary Information**

### **Spatial and functional organization of mitochondrial protein network**

Jae-Seong Yang<sup>1</sup>, Jinho Kim<sup>2</sup>, Solip Park<sup>1</sup>, Jouhyun Jeon<sup>2</sup>, Young-Eun Shin<sup>2</sup>, Sanguk Kim<sup>1,2,3,\*</sup>

<sup>1</sup>School of Interdisciplinary Bioscience and Bioengineering, <sup>2</sup>Division of Molecular and Life Science, and <sup>3</sup>Division of IT Convergence Engineering, Pohang University of Science and Technology, San 31, Hyoja-dong, Nam-gu, Pohang, Gyeongbuk, Korea, 790-784

## Supplementary Figure

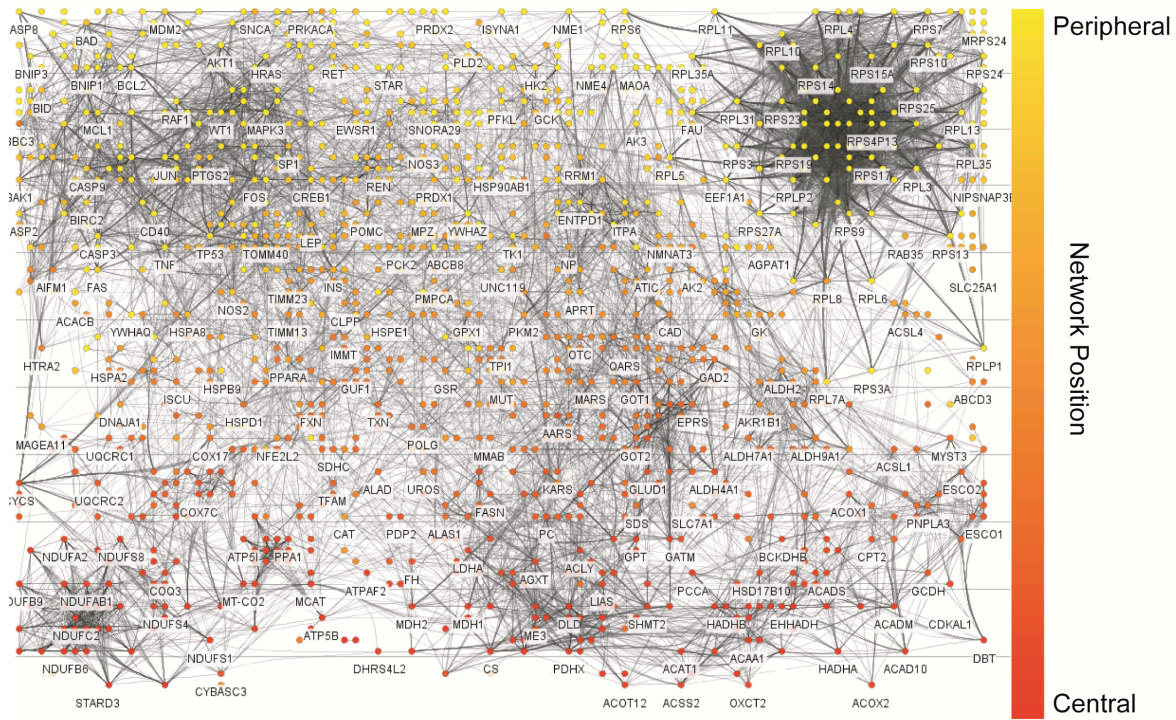

**Figure. S1.** Spatial organization of the MPF network according to network position.

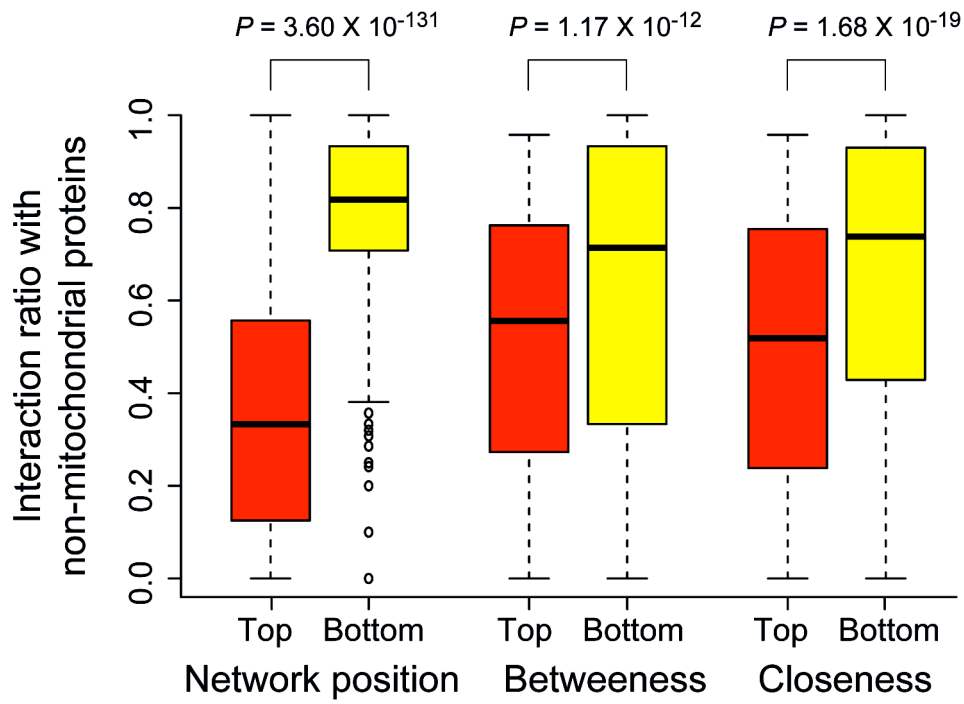

**Figure. S2.** Comparison of the interactions with non-mitochondrial protein partners. Top represent the top 50% of central proteins, whereas bottom represents the bottom 50 % of peripheral proteins.

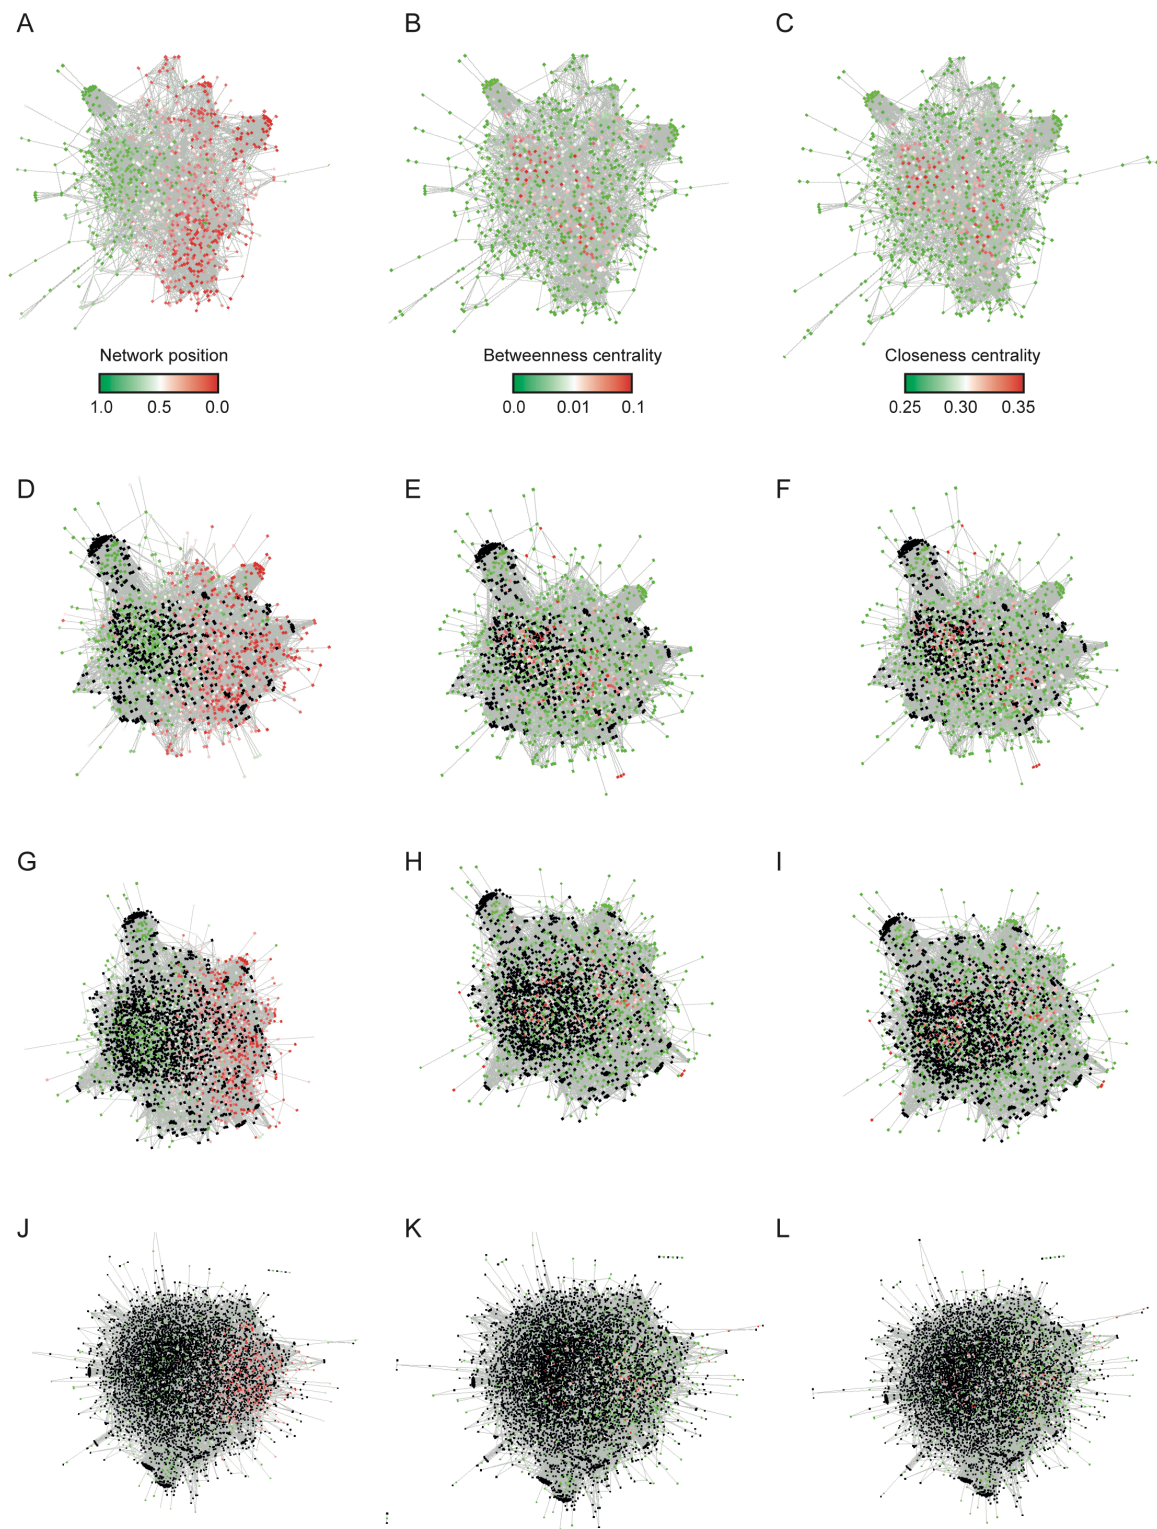

**Figure. S3.** MPF networks and non-mitochondrial protein partners by different centrality measures. A, B, and C. MPF networks. D, E, and F. MPF network with non-mitochondrial partners (black nodes). Non-mitochondrial proteins that have more than 10 links with mitochondrial proteins were shown. G, H, and I. Non-mitochondrial proteins that have more than 5 links with mitochondrial proteins were shown. J, K, and L. Non-mitochondrial proteins that have more than 1 links with mitochondrial proteins were shown.

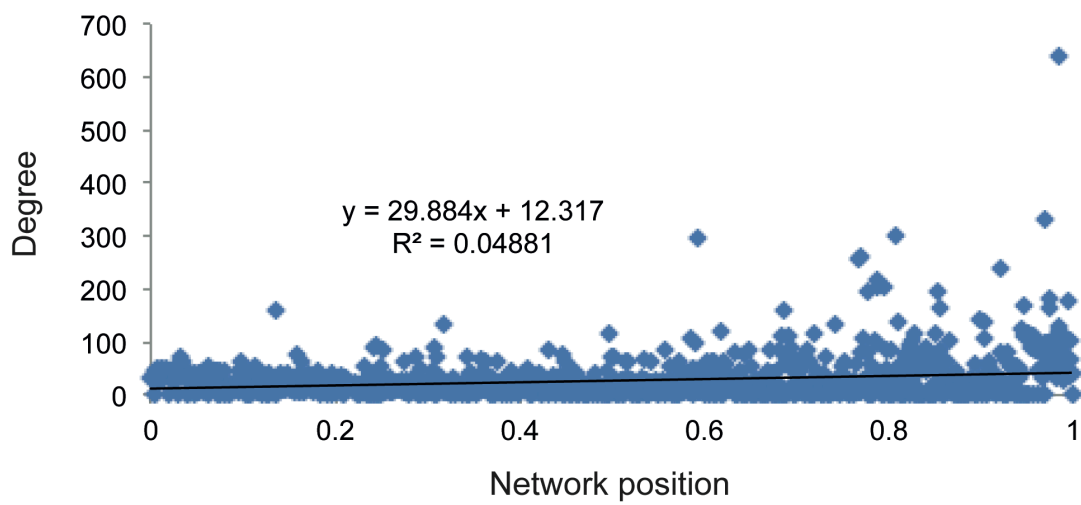

**Figure. S4.** Degree distribution according to network position. There is no significant correlation between degrees and network positions.

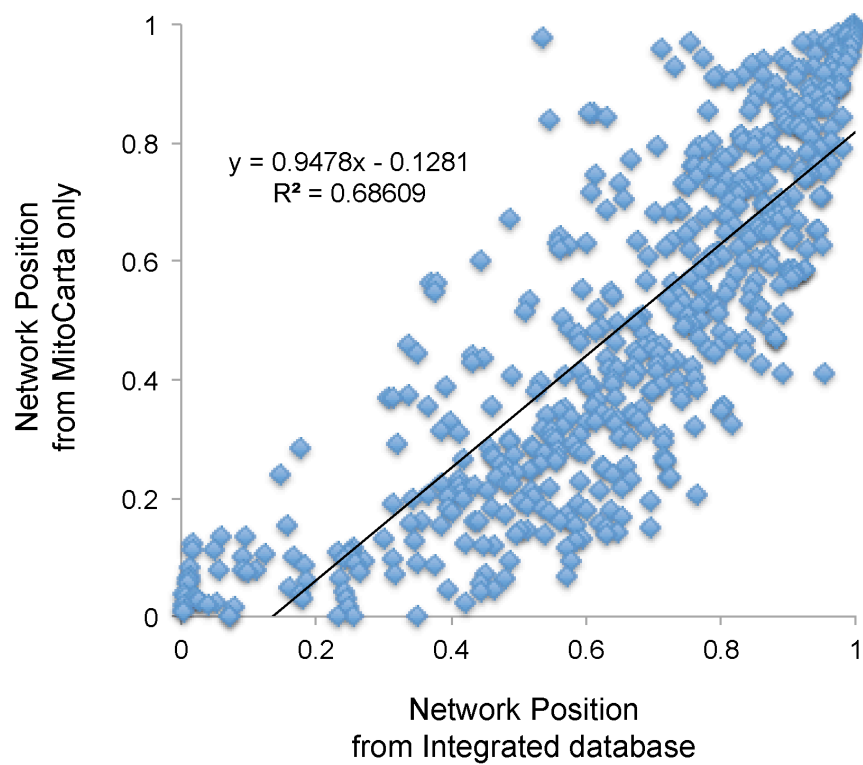

**Figure. S5.** Comparison of network positions obtained from Integrated database and MitoCarta.

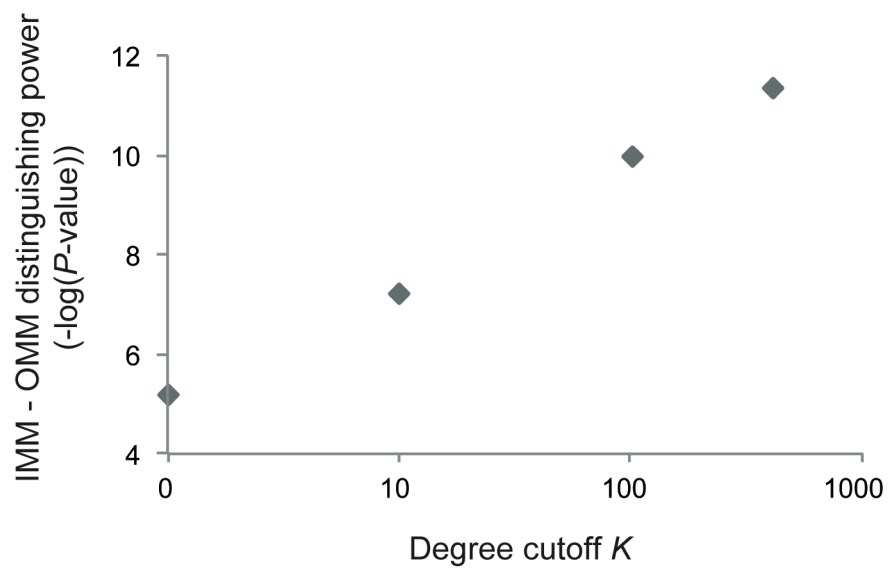

**Figure. S6.** Performance of distinguishing IMM-OMM proteins according to degree cutoff  $K$ . The performance was measured by Mann-Whitney test to separate IMM and OMM proteins.

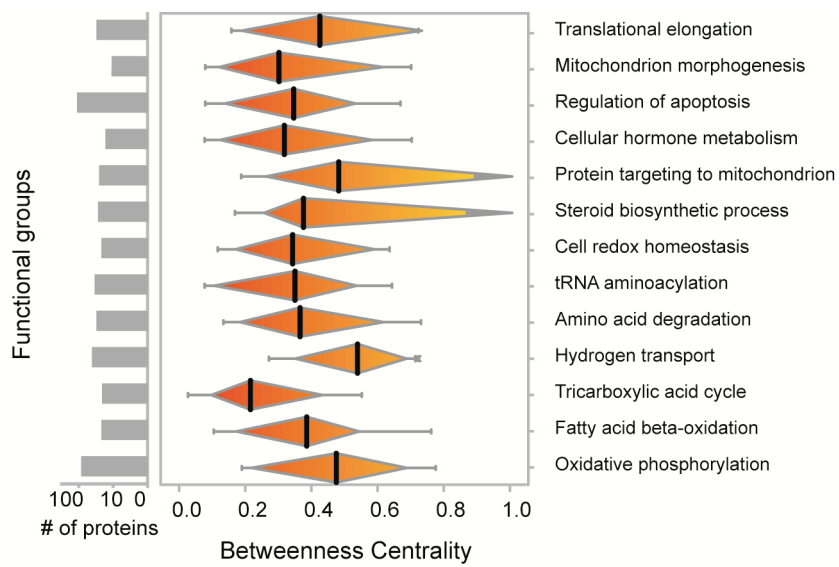

**Figure. S7.** Distribution of mitochondrial functional groups based on betweenness centrality.



**Table S1.** Network positions of mitochondrial proteins.

| Swissprot_ID | Network Position | Swissprot_ID | Network Position | Swissprot_ID | Network Position |
|--------------|------------------|--------------|------------------|--------------|------------------|
| NDUA8_HUMAN  | 0.000            | SPRE_HUMAN   | 0.334            | AK1C3_HUMAN  | 0.667            |
| NDUB5_HUMAN  | 0.004            | ADRO_HUMAN   | 0.334            | ATAD1_HUMAN  | 0.668            |
| NDUA1_HUMAN  | 0.004            | ETHE1_HUMAN  | 0.335            | RM17_HUMAN   | 0.669            |
| RM01_HUMAN   | 0.004            | ACY2_HUMAN   | 0.336            | DHRXS_HUMAN  | 0.670            |
| RM22_HUMAN   | 0.004            | PGAM2_HUMAN  | 0.337            | KU70_HUMAN   | 0.670            |
| NDUB6_HUMAN  | 0.004            | BIN3_HUMAN   | 0.338            | PDIA3_HUMAN  | 0.671            |
| ODPAT_HUMAN  | 0.005            | AK1A1_HUMAN  | 0.338            | B2LA1_HUMAN  | 0.672            |
| NU5M_HUMAN   | 0.006            | SRR_HUMAN    | 0.339            | IMPA1_HUMAN  | 0.673            |
| NDUA7_HUMAN  | 0.006            | NIT2_HUMAN   | 0.340            | FUCT1_HUMAN  | 0.674            |
| NDUAD_HUMAN  | 0.007            | SYFM_HUMAN   | 0.341            | PPIA_HUMAN   | 0.674            |
| NDUB1_HUMAN  | 0.008            | HMDH_HUMAN   | 0.342            | PMS2_HUMAN   | 0.675            |
| NDUC2_HUMAN  | 0.009            | SYDC_HUMAN   | 0.342            | TTHY_HUMAN   | 0.676            |
| NDUBA_HUMAN  | 0.010            | PYR1_HUMAN   | 0.343            | ANM1_HUMAN   | 0.677            |
| NU6M_HUMAN   | 0.010            | SYVC_HUMAN   | 0.344            | CALX_HUMAN   | 0.678            |
| ODPB_HUMAN   | 0.011            | ABCF2_HUMAN  | 0.345            | CECR5_HUMAN  | 0.679            |
| NU4M_HUMAN   | 0.012            | PYRD_HUMAN   | 0.346            | PA24B_HUMAN  | 0.679            |
| NU1M_HUMAN   | 0.013            | TRUB1_HUMAN  | 0.346            | S2536_HUMAN  | 0.680            |
| NDUB3_HUMAN  | 0.014            | SYMC_HUMAN   | 0.347            | TIM50_HUMAN  | 0.681            |
| NDUB8_HUMAN  | 0.014            | GLPK3_HUMAN  | 0.348            | GHC2_HUMAN   | 0.682            |
| ACS2L_HUMAN  | 0.015            | EFTU_HUMAN   | 0.349            | TRI31_HUMAN  | 0.682            |
| THIL_HUMAN   | 0.016            | RUSD1_HUMAN  | 0.350            | SPTA2_HUMAN  | 0.683            |
| THIM_HUMAN   | 0.017            | NDUA9_HUMAN  | 0.350            | RB11B_HUMAN  | 0.684            |
| NU4LM_HUMAN  | 0.018            | PRDX4_HUMAN  | 0.351            | NPS3B_HUMAN  | 0.685            |
| NU2M_HUMAN   | 0.018            | THIOM_HUMAN  | 0.352            | PRDX2_HUMAN  | 0.686            |
| S7A13_HUMAN  | 0.020            | PEO1_HUMAN   | 0.353            | CASP9_HUMAN  | 0.686            |
| AGT2_HUMAN   | 0.020            | HEMK1_HUMAN  | 0.354            | CC90B_HUMAN  | 0.687            |
| COX3_HUMAN   | 0.021            | SYNC_HUMAN   | 0.354            | ABHDB_HUMAN  | 0.688            |
| COX1_HUMAN   | 0.022            | DBLOH_HUMAN  | 0.355            | TCPE_HUMAN   | 0.689            |
| NDUA4_HUMAN  | 0.025            | OAT_HUMAN    | 0.356            | SLC31_HUMAN  | 0.690            |
| NDUAB_HUMAN  | 0.025            | SYWM_HUMAN   | 0.357            | SIRT4_HUMAN  | 0.690            |
| NDUC1_HUMAN  | 0.025            | AT2L2_HUMAN  | 0.358            | F136A_HUMAN  | 0.692            |
| NDUB2_HUMAN  | 0.025            | MACD1_HUMAN  | 0.358            | NDUF3_HUMAN  | 0.692            |
| NDUAC_HUMAN  | 0.026            | NFS1_HUMAN   | 0.359            | PAG15_HUMAN  | 0.693            |
| ODP2_HUMAN   | 0.026            | SYMM_HUMAN   | 0.360            | WBS16_HUMAN  | 0.694            |
| SUCA_HUMAN   | 0.027            | NIT1_HUMAN   | 0.361            | NMT1_HUMAN   | 0.694            |
| ODPA_HUMAN   | 0.028            | SYDM_HUMAN   | 0.362            | DYHC1_HUMAN  | 0.695            |
| ODPX_HUMAN   | 0.029            | IF2M_HUMAN   | 0.362            | CASP2_HUMAN  | 0.696            |
| CISY_HUMAN   | 0.030            | TACO1_HUMAN  | 0.363            | KPCD_HUMAN   | 0.697            |
| ATP6_HUMAN   | 0.030            | SSBP_HUMAN   | 0.364            | HSPB9_HUMAN  | 0.698            |
| DLDH_HUMAN   | 0.031            | DCXR_HUMAN   | 0.365            | PLS1_HUMAN   | 0.698            |
| ECHB_HUMAN   | 0.032            | SPEB_HUMAN   | 0.366            | A2MG_HUMAN   | 0.699            |
| ECHA_HUMAN   | 0.033            | MIPEP_HUMAN  | 0.366            | S12A4_HUMAN  | 0.700            |
| DHSB_HUMAN   | 0.034            | SYFB_HUMAN   | 0.367            | C11B2_HUMAN  | 0.701            |
| COX2_HUMAN   | 0.034            | TGDS_HUMAN   | 0.368            | GCH1_HUMAN   | 0.702            |
| ATPB_HUMAN   | 0.036            | MTCH1_HUMAN  | 0.369            | DISC1_HUMAN  | 0.702            |
| ATPF1_HUMAN  | 0.036            | GSHR_HUMAN   | 0.370            | BBC3_HUMAN   | 0.703            |
| ACAD9_HUMAN  | 0.037            | AIFM1_HUMAN  | 0.370            | PA2GA_HUMAN  | 0.704            |
| ECHM_HUMAN   | 0.038            | PROD_HUMAN   | 0.371            | BIK_HUMAN    | 0.705            |
| ACADL_HUMAN  | 0.038            | ABCD2_HUMAN  | 0.372            | NUDT6_HUMAN  | 0.706            |
| NDUA3_HUMAN  | 0.039            | LOXL4_HUMAN  | 0.373            | CP17A_HUMAN  | 0.706            |
| NDUS1_HUMAN  | 0.040            | AL1B1_HUMAN  | 0.374            | SGTA_HUMAN   | 0.707            |
| DCMC_HUMAN   | 0.041            | SYFA_HUMAN   | 0.374            | MTCPA_HUMAN  | 0.708            |
| NDUS5_HUMAN  | 0.042            | CTR1_HUMAN   | 0.375            | RT29_HUMAN   | 0.709            |
| MDHM_HUMAN   | 0.042            | AFG32_HUMAN  | 0.376            | STIP1_HUMAN  | 0.709            |
| NDUS3_HUMAN  | 0.043            | GRPE1_HUMAN  | 0.377            | ARK72_HUMAN  | 0.710            |
| LIPB_HUMAN   | 0.044            | AT2L1_HUMAN  | 0.377            | TCPA_HUMAN   | 0.711            |
| NDUS4_HUMAN  | 0.045            | HTRA2_HUMAN  | 0.378            | KAPCA_HUMAN  | 0.712            |
| CACP_HUMAN   | 0.045            | CLPP_HUMAN   | 0.379            | PYRG1_HUMAN  | 0.713            |
| IPYR2_HUMAN  | 0.046            | PUR9_HUMAN   | 0.380            | PIN4_HUMAN   | 0.713            |
| NDUB4_HUMAN  | 0.047            | TYSY_HUMAN   | 0.381            | MTER2_HUMAN  | 0.714            |

|             |       |             |       |             |       |
|-------------|-------|-------------|-------|-------------|-------|
| ACADM_HUMAN | 0.048 | MTHR_HUMAN  | 0.381 | FHIT_HUMAN  | 0.715 |
| LIPT_HUMAN  | 0.049 | ARGI2_HUMAN | 0.382 | PICK1_HUMAN | 0.716 |
| NDUS8_HUMAN | 0.049 | FPPS_HUMAN  | 0.383 | ANXA5_HUMAN | 0.717 |
| NDUB9_HUMAN | 0.050 | CNDP2_HUMAN | 0.384 | PA21B_HUMAN | 0.717 |
| FABD_HUMAN  | 0.052 | ABCB7_HUMAN | 0.385 | SL9A6_HUMAN | 0.718 |
| DR4L2_HUMAN | 0.052 | SELB_HUMAN  | 0.385 | B2L13_HUMAN | 0.719 |
| ALAT1_HUMAN | 0.053 | GLPK2_HUMAN | 0.386 | QORX_HUMAN  | 0.720 |
| NDUV1_HUMAN | 0.053 | SQRD_HUMAN  | 0.387 | MYH9_HUMAN  | 0.721 |
| ACPM_HUMAN  | 0.054 | GGOB1_HUMAN | 0.388 | OXA1L_HUMAN | 0.721 |
| GLYM_HUMAN  | 0.055 | ABCD3_HUMAN | 0.389 | AT1A1_HUMAN | 0.722 |
| ODB2_HUMAN  | 0.056 | HOT_HUMAN   | 0.389 | PTSS2_HUMAN | 0.723 |
| D39U1_HUMAN | 0.057 | RPE_HUMAN   | 0.390 | M3K5_HUMAN  | 0.724 |
| NDUA6_HUMAN | 0.057 | HSC20_HUMAN | 0.391 | 8ODP_HUMAN  | 0.725 |
| MIMIT_HUMAN | 0.058 | CRYAB_HUMAN | 0.392 | TCPD_HUMAN  | 0.725 |
| PDK3_HUMAN  | 0.059 | KITM_HUMAN  | 0.393 | P53_HUMAN   | 0.726 |
| NDUB7_HUMAN | 0.060 | ALDR_HUMAN  | 0.393 | TCPG_HUMAN  | 0.727 |
| LDHC_HUMAN  | 0.061 | DHSO_HUMAN  | 0.394 | ICT1_HUMAN  | 0.728 |
| LDH6A_HUMAN | 0.061 | PXMP2_HUMAN | 0.395 | CASP3_HUMAN | 0.729 |
| ACDSB_HUMAN | 0.062 | ENTK_HUMAN  | 0.396 | B2L11_HUMAN | 0.729 |
| NDUV2_HUMAN | 0.063 | CO2_HUMAN   | 0.397 | PEPL_HUMAN  | 0.730 |
| THIC_HUMAN  | 0.064 | HEMH_HUMAN  | 0.397 | GTPB3_HUMAN | 0.731 |
| HMGCL_HUMAN | 0.065 | CISD1_HUMAN | 0.398 | MYH7_HUMAN  | 0.732 |
| LDH6B_HUMAN | 0.065 | TIM13_HUMAN | 0.399 | CATD_HUMAN  | 0.733 |
| NDUS2_HUMAN | 0.066 | RM11_HUMAN  | 0.400 | HS90A_HUMAN | 0.733 |
| MCEE_HUMAN  | 0.067 | UCP2_HUMAN  | 0.401 | LMNA_HUMAN  | 0.734 |
| DHTK1_HUMAN | 0.068 | CATA_HUMAN  | 0.401 | 3MG_HUMAN   | 0.735 |
| HAOX2_HUMAN | 0.069 | GIDRP_HUMAN | 0.402 | PA24A_HUMAN | 0.736 |
| MAON_HUMAN  | 0.069 | TRXR1_HUMAN | 0.403 | AKA10_HUMAN | 0.737 |
| ATP8_HUMAN  | 0.070 | LONP2_HUMAN | 0.404 | ARK73_HUMAN | 0.737 |
| SUCB2_HUMAN | 0.071 | SYVM_HUMAN  | 0.405 | PRS6A_HUMAN | 0.738 |
| ATPF2_HUMAN | 0.072 | PDIP2_HUMAN | 0.405 | FLOT1_HUMAN | 0.739 |
| ODO2_HUMAN  | 0.073 | S40A1_HUMAN | 0.406 | KCY_HUMAN   | 0.740 |
| SYEM_HUMAN  | 0.073 | ASSY_HUMAN  | 0.407 | MSH3_HUMAN  | 0.741 |
| PCCB_HUMAN  | 0.074 | PRDX6_HUMAN | 0.408 | CI046_HUMAN | 0.741 |
| LDHD_HUMAN  | 0.075 | ADT1_HUMAN  | 0.409 | MUTYH_HUMAN | 0.742 |
| AT5F1_HUMAN | 0.077 | PGK1_HUMAN  | 0.409 | RAB1B_HUMAN | 0.743 |
| ATPK_HUMAN  | 0.077 | UK114_HUMAN | 0.410 | SNN_HUMAN   | 0.744 |
| AT5G1_HUMAN | 0.077 | RRF2M_HUMAN | 0.411 | TBRG4_HUMAN | 0.745 |
| GLYC_HUMAN  | 0.078 | SYIM_HUMAN  | 0.412 | KCRU_HUMAN  | 0.745 |
| SUCB1_HUMAN | 0.079 | RT11_HUMAN  | 0.413 | ELN_HUMAN   | 0.746 |
| SCOT1_HUMAN | 0.080 | MOC51_HUMAN | 0.413 | FIBP_HUMAN  | 0.747 |
| THIK_HUMAN  | 0.081 | MPPB_HUMAN  | 0.414 | AMRP_HUMAN  | 0.748 |
| LIAS_HUMAN  | 0.081 | HEBP2_HUMAN | 0.415 | FKB1A_HUMAN | 0.749 |
| CQ10B_HUMAN | 0.083 | FOLC_HUMAN  | 0.416 | PARK7_HUMAN | 0.749 |
| CQ10A_HUMAN | 0.083 | CYB5_HUMAN  | 0.417 | LAT1N_HUMAN | 0.750 |
| MAOM_HUMAN  | 0.084 | CLPX_HUMAN  | 0.417 | RM38_HUMAN  | 0.751 |
| COQ3_HUMAN  | 0.085 | TKT_HUMAN   | 0.418 | CASP4_HUMAN | 0.752 |
| PCCA_HUMAN  | 0.085 | NUBPL_HUMAN | 0.419 | RB11A_HUMAN | 0.753 |
| HMCS2_HUMAN | 0.086 | TPC_HUMAN   | 0.420 | SFXN5_HUMAN | 0.753 |
| SODM_HUMAN  | 0.087 | SYHC_HUMAN  | 0.421 | PTPS_HUMAN  | 0.754 |
| ATP5L_HUMAN | 0.089 | SYRC_HUMAN  | 0.421 | DMPK_HUMAN  | 0.755 |
| ATP5H_HUMAN | 0.089 | IMMT_HUMAN  | 0.422 | BLMH_HUMAN  | 0.756 |
| NDUS6_HUMAN | 0.089 | MSRB3_HUMAN | 0.423 | LYPA1_HUMAN | 0.757 |
| HMCS1_HUMAN | 0.090 | RT12_HUMAN  | 0.424 | PK3C3_HUMAN | 0.757 |
| ECHD3_HUMAN | 0.091 | DGUOK_HUMAN | 0.425 | GMPPB_HUMAN | 0.758 |
| ATPD_HUMAN  | 0.092 | CLN3_HUMAN  | 0.425 | CASP8_HUMAN | 0.759 |
| CBR4_HUMAN  | 0.093 | KYNU_HUMAN  | 0.426 | C11B1_HUMAN | 0.760 |
| AACS_HUMAN  | 0.093 | DCOR_HUMAN  | 0.427 | CXA9_HUMAN  | 0.761 |
| MTO1_HUMAN  | 0.094 | AMPL_HUMAN  | 0.428 | MCL1_HUMAN  | 0.761 |
| ATP5E_HUMAN | 0.095 | GPX4_HUMAN  | 0.429 | USMG5_HUMAN | 0.762 |
| NDUA2_HUMAN | 0.096 | NUCG_HUMAN  | 0.429 | AICDA_HUMAN | 0.763 |
| ACSA_HUMAN  | 0.097 | PPCE_HUMAN  | 0.430 | XPR1_HUMAN  | 0.764 |
| SPYA_HUMAN  | 0.097 | CTR3_HUMAN  | 0.431 | OAS2_HUMAN  | 0.765 |
| ATP5J_HUMAN | 0.098 | GLPK_HUMAN  | 0.432 | GELS_HUMAN  | 0.765 |

|             |       |             |       |             |       |
|-------------|-------|-------------|-------|-------------|-------|
| MAOX_HUMAN  | 0.099 | HBG2_HUMAN  | 0.433 | AKAP1_HUMAN | 0.766 |
| ATP5I_HUMAN | 0.100 | RM12_HUMAN  | 0.433 | SYRM_HUMAN  | 0.767 |
| CIA30_HUMAN | 0.101 | CMC2_HUMAN  | 0.434 | ORN_HUMAN   | 0.768 |
| SCO1_HUMAN  | 0.101 | QRSL1_HUMAN | 0.435 | RBM12_HUMAN | 0.769 |
| ATPO_HUMAN  | 0.102 | EFGM_HUMAN  | 0.436 | CRY1_HUMAN  | 0.769 |
| OGDHL_HUMAN | 0.103 | ACOD_HUMAN  | 0.437 | M11D1_HUMAN | 0.770 |
| BDH_HUMAN   | 0.104 | DHB8_HUMAN  | 0.437 | PSA_HUMAN   | 0.771 |
| LACE1_HUMAN | 0.105 | MUTA_HUMAN  | 0.438 | NOX1_HUMAN  | 0.772 |
| DHSD_HUMAN  | 0.105 | PPOX_HUMAN  | 0.439 | TRI39_HUMAN | 0.773 |
| ACOX2_HUMAN | 0.107 | RT411_HUMAN | 0.440 | AAA1_HUMAN  | 0.773 |
| ACOX3_HUMAN | 0.107 | RM03_HUMAN  | 0.441 | PAF_HUMAN   | 0.774 |
| AL4A1_HUMAN | 0.108 | HSP72_HUMAN | 0.441 | CRY2_HUMAN  | 0.775 |
| AT5G2_HUMAN | 0.109 | MSRB2_HUMAN | 0.442 | SYJ2B_HUMAN | 0.776 |
| ACD10_HUMAN | 0.109 | SIRT5_HUMAN | 0.443 | ATIF1_HUMAN | 0.777 |
| COX11_HUMAN | 0.110 | PANK2_HUMAN | 0.444 | NCOR2_HUMAN | 0.777 |
| CYB_HUMAN   | 0.111 | TIM10_HUMAN | 0.445 | RT09_HUMAN  | 0.778 |
| COX10_HUMAN | 0.112 | RM04_HUMAN  | 0.445 | RAB17_HUMAN | 0.779 |
| MCCB_HUMAN  | 0.113 | SC11C_HUMAN | 0.446 | SIRT3_HUMAN | 0.780 |
| ACSF2_HUMAN | 0.113 | PPA6_HUMAN  | 0.447 | PKD2_HUMAN  | 0.781 |
| ODBB_HUMAN  | 0.114 | TM147_HUMAN | 0.448 | I433E_HUMAN | 0.781 |
| MCCA_HUMAN  | 0.115 | ADHX_HUMAN  | 0.449 | MLH1_HUMAN  | 0.782 |
| COX15_HUMAN | 0.116 | AAPK2_HUMAN | 0.449 | TMEDA_HUMAN | 0.783 |
| CX6B1_HUMAN | 0.117 | KAD1_HUMAN  | 0.450 | VIME_HUMAN  | 0.784 |
| COX42_HUMAN | 0.119 | TIM9_HUMAN  | 0.451 | FUND2_HUMAN | 0.785 |
| CYC_HUMAN   | 0.119 | MAT2B_HUMAN | 0.452 | CLH1_HUMAN  | 0.785 |
| CX6A2_HUMAN | 0.119 | CX7B2_HUMAN | 0.453 | GCR_HUMAN   | 0.786 |
| LDHB_HUMAN  | 0.120 | NQO1_HUMAN  | 0.453 | JAM1_HUMAN  | 0.787 |
| AUHM_HUMAN  | 0.121 | ALDH2_HUMAN | 0.454 | RASK_HUMAN  | 0.788 |
| HIBCH_HUMAN | 0.121 | ALDOA_HUMAN | 0.455 | F262_HUMAN  | 0.789 |
| DHE4_HUMAN  | 0.122 | ABCD1_HUMAN | 0.456 | TAZ_HUMAN   | 0.789 |
| ECHD2_HUMAN | 0.123 | AMP1D_HUMAN | 0.457 | BRCA1_HUMAN | 0.790 |
| CX6A1_HUMAN | 0.124 | PERT_HUMAN  | 0.457 | NCOA7_HUMAN | 0.791 |
| DHSA_HUMAN  | 0.125 | NFU1_HUMAN  | 0.458 | DNM1L_HUMAN | 0.792 |
| IVD_HUMAN   | 0.125 | ACACB_HUMAN | 0.459 | CLIC4_HUMAN | 0.792 |
| COX7C_HUMAN | 0.126 | PNKD_HUMAN  | 0.460 | PPLA_HUMAN  | 0.793 |
| ACADS_HUMAN | 0.127 | ATP7B_HUMAN | 0.460 | NAC2_HUMAN  | 0.794 |
| DHE3_HUMAN  | 0.128 | AIBP_HUMAN  | 0.461 | STAT3_HUMAN | 0.795 |
| ACSM1_HUMAN | 0.128 | TIM22_HUMAN | 0.462 | RAB32_HUMAN | 0.796 |
| SARDH_HUMAN | 0.129 | NUBP2_HUMAN | 0.463 | BDNF_HUMAN  | 0.796 |
| FUMH_HUMAN  | 0.130 | CH10_HUMAN  | 0.464 | ESR2_HUMAN  | 0.797 |
| SCO2_HUMAN  | 0.131 | LONM_HUMAN  | 0.464 | CMGA_HUMAN  | 0.798 |
| ODO1_HUMAN  | 0.132 | MOSC2_HUMAN | 0.465 | DRG2_HUMAN  | 0.799 |
| HCD2_HUMAN  | 0.132 | RNZZ_HUMAN  | 0.466 | SEPT4_HUMAN | 0.800 |
| GATM_HUMAN  | 0.133 | TXTP_HUMAN  | 0.467 | STAR3_HUMAN | 0.800 |
| QCR6_HUMAN  | 0.134 | PRDX3_HUMAN | 0.468 | KBP_HUMAN   | 0.801 |
| COX5B_HUMAN | 0.135 | IRK11_HUMAN | 0.468 | CD59_HUMAN  | 0.802 |
| ALAT2_HUMAN | 0.136 | CMC1_HUMAN  | 0.469 | DPYL2_HUMAN | 0.803 |
| COX7R_HUMAN | 0.136 | KGUA_HUMAN  | 0.470 | CP24A_HUMAN | 0.804 |
| ECHP_HUMAN  | 0.137 | PERP_HUMAN  | 0.471 | GNA12_HUMAN | 0.804 |
| COX41_HUMAN | 0.138 | TRY3_HUMAN  | 0.472 | ZNT9_HUMAN  | 0.805 |
| OXSM_HUMAN  | 0.139 | NMNA3_HUMAN | 0.472 | AKIP_HUMAN  | 0.806 |
| PDP2_HUMAN  | 0.140 | G6PI_HUMAN  | 0.473 | BIG2_HUMAN  | 0.807 |
| MMSA_HUMAN  | 0.140 | ORNT1_HUMAN | 0.474 | SAM50_HUMAN | 0.808 |
| SCOT2_HUMAN | 0.141 | ACBP_HUMAN  | 0.475 | PP1G_HUMAN  | 0.808 |
| PYC_HUMAN   | 0.142 | SODC_HUMAN  | 0.476 | TBA1B_HUMAN | 0.809 |
| GLSK_HUMAN  | 0.143 | DNJA2_HUMAN | 0.476 | DCTN6_HUMAN | 0.810 |
| COX8C_HUMAN | 0.144 | RM09_HUMAN  | 0.477 | RT18B_HUMAN | 0.811 |
| THTM_HUMAN  | 0.144 | GUA_A_HUMAN | 0.478 | FHL2_HUMAN  | 0.812 |
| ACLY_HUMAN  | 0.145 | ACSL4_HUMAN | 0.479 | NDK3_HUMAN  | 0.812 |
| BCKD_HUMAN  | 0.146 | TOM34_HUMAN | 0.480 | DESM_HUMAN  | 0.813 |
| ACACA_HUMAN | 0.147 | TIM23_HUMAN | 0.480 | NDUV3_HUMAN | 0.814 |
| ODBA_HUMAN  | 0.148 | GPSM1_HUMAN | 0.481 | BNC1_HUMAN  | 0.815 |
| ETFB_HUMAN  | 0.148 | HBD_HUMAN   | 0.482 | RMD3_HUMAN  | 0.816 |
| ATPA_HUMAN  | 0.149 | SYNM_HUMAN  | 0.483 | CP27B_HUMAN | 0.816 |

|             |       |             |       |             |       |
|-------------|-------|-------------|-------|-------------|-------|
| SURF1_HUMAN | 0.150 | CK5P1_HUMAN | 0.484 | KPCA_HUMAN  | 0.817 |
| GCDH_HUMAN  | 0.151 | NNTM_HUMAN  | 0.484 | RM10_HUMAN  | 0.818 |
| THNS2_HUMAN | 0.152 | DNJA1_HUMAN | 0.485 | RAD50_HUMAN | 0.819 |
| CPT2_HUMAN  | 0.152 | TOM20_HUMAN | 0.486 | PPGB_HUMAN  | 0.820 |
| COX8A_HUMAN | 0.153 | ABCD4_HUMAN | 0.487 | NUDT8_HUMAN | 0.820 |
| DHB4_HUMAN  | 0.154 | PRDX5_HUMAN | 0.488 | RT26_HUMAN  | 0.821 |
| MECR_HUMAN  | 0.155 | PNPT1_HUMAN | 0.488 | RASH_HUMAN  | 0.822 |
| CX7A1_HUMAN | 0.156 | GCP60_HUMAN | 0.489 | SAP_HUMAN   | 0.823 |
| ACOX1_HUMAN | 0.156 | PERM_HUMAN  | 0.490 | ALR_HUMAN   | 0.824 |
| LDHA_HUMAN  | 0.157 | KAP3_HUMAN  | 0.491 | RFA2_HUMAN  | 0.824 |
| COX6C_HUMAN | 0.158 | CYBR1_HUMAN | 0.492 | NDK6_HUMAN  | 0.825 |
| DHRS1_HUMAN | 0.159 | FRIH_HUMAN  | 0.492 | K2C8_HUMAN  | 0.826 |
| NDUS7_HUMAN | 0.160 | CG030_HUMAN | 0.493 | PP2AA_HUMAN | 0.827 |
| PCKGC_HUMAN | 0.160 | TKTL2_HUMAN | 0.494 | THEM4_HUMAN | 0.828 |
| NDUA5_HUMAN | 0.161 | G3P_HUMAN   | 0.495 | MTCPB_HUMAN | 0.828 |
| QCR2_HUMAN  | 0.162 | OLA1_HUMAN  | 0.496 | DDX18_HUMAN | 0.829 |
| MTDC_HUMAN  | 0.163 | MPPA_HUMAN  | 0.496 | ES1_HUMAN   | 0.830 |
| SYK_HUMAN   | 0.164 | DAPAL_HUMAN | 0.497 | DEPP_HUMAN  | 0.831 |
| HEM0_HUMAN  | 0.164 | BCDO2_HUMAN | 0.498 | FRAP_HUMAN  | 0.832 |
| VA0D2_HUMAN | 0.165 | ALDOC_HUMAN | 0.499 | RT18A_HUMAN | 0.832 |
| QCR10_HUMAN | 0.166 | DPOLQ_HUMAN | 0.500 | RAB8B_HUMAN | 0.833 |
| VATG3_HUMAN | 0.167 | ATTY_HUMAN  | 0.500 | APEX2_HUMAN | 0.834 |
| PEC1_HUMAN  | 0.168 | CP4AM_HUMAN | 0.501 | K1C18_HUMAN | 0.835 |
| ACOT9_HUMAN | 0.169 | SELO_HUMAN  | 0.502 | DYN1_HUMAN  | 0.836 |
| ACO11_HUMAN | 0.169 | MSRA_HUMAN  | 0.503 | NEUL_HUMAN  | 0.836 |
| C1TM_HUMAN  | 0.170 | HXK4_HUMAN  | 0.504 | TBB5_HUMAN  | 0.837 |
| IDH3G_HUMAN | 0.171 | GPX1_HUMAN  | 0.504 | MCSP_HUMAN  | 0.838 |
| MDHC_HUMAN  | 0.172 | TRM1_HUMAN  | 0.506 | CDKAL_HUMAN | 0.839 |
| ACN9_HUMAN  | 0.172 | CT072_HUMAN | 0.506 | CEBPZ_HUMAN | 0.840 |
| ACON_HUMAN  | 0.173 | KAD4_HUMAN  | 0.507 | NDKA_HUMAN  | 0.840 |
| IPYR_HUMAN  | 0.174 | S2538_HUMAN | 0.508 | PEBP1_HUMAN | 0.841 |
| GATB_HUMAN  | 0.175 | TI17B_HUMAN | 0.508 | RN5A_HUMAN  | 0.842 |
| COX5A_HUMAN | 0.176 | DHB2_HUMAN  | 0.509 | TNF11_HUMAN | 0.843 |
| IDHP_HUMAN  | 0.176 | ABCBA_HUMAN | 0.510 | S12A1_HUMAN | 0.844 |
| FAAH2_HUMAN | 0.177 | MYPC3_HUMAN | 0.511 | MTX2_HUMAN  | 0.844 |
| KBL_HUMAN   | 0.178 | UNG_HUMAN   | 0.512 | AT2A2_HUMAN | 0.845 |
| VATO_HUMAN  | 0.179 | SYHM_HUMAN  | 0.512 | MERL_HUMAN  | 0.846 |
| TIM8B_HUMAN | 0.180 | PUR8_HUMAN  | 0.513 | DECR_HUMAN  | 0.847 |
| BCS1_HUMAN  | 0.180 | RAB35_HUMAN | 0.514 | DHX29_HUMAN | 0.848 |
| SCLY_HUMAN  | 0.181 | CHDH_HUMAN  | 0.515 | LAMA4_HUMAN | 0.848 |
| VATE2_HUMAN | 0.182 | NUDT9_HUMAN | 0.516 | BCCIP_HUMAN | 0.849 |
| VATA_HUMAN  | 0.183 | ACADV_HUMAN | 0.516 | LAT1_HUMAN  | 0.850 |
| HAOX1_HUMAN | 0.184 | TOM40_HUMAN | 0.517 | TMM70_HUMAN | 0.851 |
| P5CS_HUMAN  | 0.184 | ABCB6_HUMAN | 0.518 | SFXN2_HUMAN | 0.852 |
| PDP1_HUMAN  | 0.185 | VDAC2_HUMAN | 0.519 | NR4A1_HUMAN | 0.852 |
| CLYBL_HUMAN | 0.186 | TSPOA_HUMAN | 0.520 | MTX1_HUMAN  | 0.853 |
| L2HDH_HUMAN | 0.187 | TOM7_HUMAN  | 0.520 | B2CL2_HUMAN | 0.854 |
| VATB2_HUMAN | 0.188 | PTH_HUMAN   | 0.521 | STML3_HUMAN | 0.855 |
| TFAM_HUMAN  | 0.188 | COMT_HUMAN  | 0.522 | PSN1_HUMAN  | 0.856 |
| COX7B_HUMAN | 0.189 | KCR5_HUMAN  | 0.523 | ATR_HUMAN   | 0.856 |
| FTHFD_HUMAN | 0.190 | NUD18_HUMAN | 0.524 | RAF1_HUMAN  | 0.857 |
| VATC1_HUMAN | 0.191 | ABCC9_HUMAN | 0.524 | LETM1_HUMAN | 0.858 |
| CPT1A_HUMAN | 0.192 | NRF1_HUMAN  | 0.525 | GNDS_HUMAN  | 0.859 |
| DHRS2_HUMAN | 0.192 | INMT_HUMAN  | 0.526 | MK12_HUMAN  | 0.860 |
| GLO2_HUMAN  | 0.193 | TIM44_HUMAN | 0.527 | CASQ1_HUMAN | 0.860 |
| CPT1B_HUMAN | 0.194 | TPH2_HUMAN  | 0.528 | BASI_HUMAN  | 0.861 |
| SPTC2_HUMAN | 0.195 | TOP2B_HUMAN | 0.528 | EZRI_HUMAN  | 0.862 |
| VATG1_HUMAN | 0.196 | UXS1_HUMAN  | 0.529 | SCMC1_HUMAN | 0.863 |
| QCR7_HUMAN  | 0.196 | EF1A2_HUMAN | 0.530 | BOK_HUMAN   | 0.864 |
| MRP9_HUMAN  | 0.198 | DPYD_HUMAN  | 0.531 | NOL3_HUMAN  | 0.864 |
| RT07_HUMAN  | 0.198 | MAAI_HUMAN  | 0.532 | ITB1_HUMAN  | 0.865 |
| RUSD4_HUMAN | 0.199 | TOM22_HUMAN | 0.532 | PDC6I_HUMAN | 0.866 |
| GRP75_HUMAN | 0.200 | HSPB6_HUMAN | 0.533 | MK09_HUMAN  | 0.867 |
| C1TC_HUMAN  | 0.200 | RIMB1_HUMAN | 0.534 | IKBA_HUMAN  | 0.868 |

|             |       |             |       |             |       |
|-------------|-------|-------------|-------|-------------|-------|
| CPT1C_HUMAN | 0.201 | TXND3_HUMAN | 0.535 | NFKB1_HUMAN | 0.868 |
| GLRX5_HUMAN | 0.202 | GLRX1_HUMAN | 0.536 | ABL1_HUMAN  | 0.869 |
| QCRI_HUMAN  | 0.203 | TAPI_HUMAN  | 0.536 | EXO_G_HUMAN | 0.870 |
| 3HIDH_HUMAN | 0.204 | FABP4_HUMAN | 0.537 | PTN21_HUMAN | 0.871 |
| MRM1_HUMAN  | 0.204 | NDKB_HUMAN  | 0.538 | BR44L_HUMAN | 0.872 |
| PDK4_HUMAN  | 0.205 | TI17A_HUMAN | 0.539 | RM19_HUMAN  | 0.872 |
| COQ2_HUMAN  | 0.206 | CP27A_HUMAN | 0.540 | WDR3_HUMAN  | 0.873 |
| SYSM_HUMAN  | 0.207 | RIFK_HUMAN  | 0.540 | NIPS1_HUMAN | 0.874 |
| VATH_HUMAN  | 0.208 | VDAC1_HUMAN | 0.541 | VAMP1_HUMAN | 0.875 |
| ACOC_HUMAN  | 0.208 | KAT1_HUMAN  | 0.542 | 3BP5_HUMAN  | 0.875 |
| VATF_HUMAN  | 0.209 | TRXR3_HUMAN | 0.543 | PYRG2_HUMAN | 0.876 |
| D3D2_HUMAN  | 0.210 | ADPPT_HUMAN | 0.543 | HCLS1_HUMAN | 0.877 |
| BCAT2_HUMAN | 0.211 | THIO_HUMAN  | 0.544 | OAS1_HUMAN  | 0.878 |
| NAGS_HUMAN  | 0.211 | DIMT1_HUMAN | 0.545 | UACA_HUMAN  | 0.879 |
| QCR8_HUMAN  | 0.212 | APOA1_HUMAN | 0.546 | TERT_HUMAN  | 0.879 |
| COQ4_HUMAN  | 0.213 | DCHS_HUMAN  | 0.547 | MSTO1_HUMAN | 0.880 |
| M2GD_HUMAN  | 0.214 | CLPB_HUMAN  | 0.547 | CASQ2_HUMAN | 0.881 |
| MPCP_HUMAN  | 0.215 | RFIP5_HUMAN | 0.548 | AIFM2_HUMAN | 0.882 |
| S27A3_HUMAN | 0.215 | GSTO1_HUMAN | 0.549 | PI4KB_HUMAN | 0.883 |
| VA0D1_HUMAN | 0.216 | RT27_HUMAN  | 0.550 | FDXA1_HUMAN | 0.883 |
| VATD_HUMAN  | 0.217 | CNNM4_HUMAN | 0.551 | NDK8_HUMAN  | 0.884 |
| S27A2_HUMAN | 0.218 | DUT_HUMAN   | 0.551 | LTMD1_HUMAN | 0.885 |
| UCRIL_HUMAN | 0.219 | MOCOS_HUMAN | 0.552 | WASF1_HUMAN | 0.886 |
| AT5G3_HUMAN | 0.219 | KCRB_HUMAN  | 0.553 | GRB10_HUMAN | 0.887 |
| ACAD8_HUMAN | 0.220 | PGES2_HUMAN | 0.554 | SAP3_HUMAN  | 0.887 |
| FAS_HUMAN   | 0.221 | PM34_HUMAN  | 0.555 | SDSL_HUMAN  | 0.888 |
| VATL_HUMAN  | 0.222 | 5NT3_HUMAN  | 0.555 | PAK7_HUMAN  | 0.889 |
| MTU1_HUMAN  | 0.223 | GLYAT_HUMAN | 0.556 | NEP1_HUMAN  | 0.890 |
| ACSL5_HUMAN | 0.223 | NT5C_HUMAN  | 0.557 | EFHA1_HUMAN | 0.891 |
| BCAT1_HUMAN | 0.224 | GTR4_HUMAN  | 0.558 | MTFR1_HUMAN | 0.891 |
| IDH3B_HUMAN | 0.225 | NPS3A_HUMAN | 0.559 | S2546_HUMAN | 0.892 |
| SYSC_HUMAN  | 0.226 | DYH11_HUMAN | 0.559 | TUSC2_HUMAN | 0.893 |
| PDK2_HUMAN  | 0.227 | UBP30_HUMAN | 0.560 | MFTC_HUMAN  | 0.894 |
| CY1_HUMAN   | 0.227 | HSDL2_HUMAN | 0.561 | RPGF3_HUMAN | 0.895 |
| ACSL3_HUMAN | 0.228 | NUD12_HUMAN | 0.562 | IQCE_HUMAN  | 0.895 |
| COQ5_HUMAN  | 0.229 | TCPB_HUMAN  | 0.563 | SYNJ2_HUMAN | 0.896 |
| IDHC_HUMAN  | 0.230 | UDB17_HUMAN | 0.563 | ACTA_HUMAN  | 0.897 |
| FMT_HUMAN   | 0.231 | K6PF_HUMAN  | 0.564 | WVOX_HUMAN  | 0.898 |
| ADCK5_HUMAN | 0.231 | TOM70_HUMAN | 0.565 | UBQL1_HUMAN | 0.899 |
| SYLM_HUMAN  | 0.232 | HAP1_HUMAN  | 0.566 | PGPS1_HUMAN | 0.899 |
| SYAC_HUMAN  | 0.233 | RM44_HUMAN  | 0.567 | KPCD1_HUMAN | 0.900 |
| ODC_HUMAN   | 0.234 | PLCC_HUMAN  | 0.567 | RPC8_HUMAN  | 0.901 |
| NB5R1_HUMAN | 0.235 | PEMT_HUMAN  | 0.568 | CHCH3_HUMAN | 0.902 |
| GTPB5_HUMAN | 0.235 | PLCA_HUMAN  | 0.569 | HIG1A_HUMAN | 0.903 |
| VATB1_HUMAN | 0.236 | DNJA3_HUMAN | 0.570 | AP4A_HUMAN  | 0.903 |
| IDH3A_HUMAN | 0.237 | RM41_HUMAN  | 0.571 | FASTK_HUMAN | 0.904 |
| CH60_HUMAN  | 0.238 | PLCB_HUMAN  | 0.571 | GDIB_HUMAN  | 0.905 |
| ACSL1_HUMAN | 0.239 | HS90B_HUMAN | 0.572 | AOFB_HUMAN  | 0.906 |
| AATM_HUMAN  | 0.239 | PDIA1_HUMAN | 0.573 | HAX1_HUMAN  | 0.907 |
| HEM1_HUMAN  | 0.240 | PX11B_HUMAN | 0.574 | 3BHS1_HUMAN | 0.907 |
| C560_HUMAN  | 0.241 | GSTA4_HUMAN | 0.575 | STA13_HUMAN | 0.908 |
| ACYP2_HUMAN | 0.242 | RIR1_HUMAN  | 0.575 | CRLS1_HUMAN | 0.909 |
| MCAT_HUMAN  | 0.243 | GIMA5_HUMAN | 0.576 | MAVS_HUMAN  | 0.910 |
| LPPRC_HUMAN | 0.243 | I433Z_HUMAN | 0.577 | KAT3_HUMAN  | 0.911 |
| SYG_HUMAN   | 0.244 | AL1A2_HUMAN | 0.578 | IRAK1_HUMAN | 0.911 |
| FAHD1_HUMAN | 0.245 | HSPB1_HUMAN | 0.579 | SFXN1_HUMAN | 0.912 |
| GLNA_HUMAN  | 0.246 | DHPR_HUMAN  | 0.579 | RM39_HUMAN  | 0.913 |
| PDK1_HUMAN  | 0.247 | HXK3_HUMAN  | 0.580 | FNBP2_HUMAN | 0.914 |
| GPDA_HUMAN  | 0.247 | ADT3_HUMAN  | 0.581 | MUL1_HUMAN  | 0.915 |
| UCRI_HUMAN  | 0.248 | GOLI_HUMAN  | 0.582 | FIS1_HUMAN  | 0.915 |
| ERAL_HUMAN  | 0.249 | KAD2_HUMAN  | 0.583 | RHG01_HUMAN | 0.916 |
| ADCK3_HUMAN | 0.250 | PTH2_HUMAN  | 0.583 | SIVA_HUMAN  | 0.917 |
| TMLH_HUMAN  | 0.251 | PLCE_HUMAN  | 0.584 | PTOR1_HUMAN | 0.918 |
| SDHL_HUMAN  | 0.251 | CP11A_HUMAN | 0.585 | IMP3_HUMAN  | 0.919 |

|             |       |             |       |             |       |
|-------------|-------|-------------|-------|-------------|-------|
| AATC_HUMAN  | 0.252 | AR2BP_HUMAN | 0.586 | IFIT3_HUMAN | 0.919 |
| GABT_HUMAN  | 0.253 | CP1A1_HUMAN | 0.587 | GDIR2_HUMAN | 0.920 |
| COX17_HUMAN | 0.254 | PRDX1_HUMAN | 0.587 | NLRX1_HUMAN | 0.921 |
| SSDH_HUMAN  | 0.255 | PIIF_HUMAN  | 0.588 | RL8_HUMAN   | 0.922 |
| GPDM_HUMAN  | 0.255 | CTR2_HUMAN  | 0.589 | ASML_HUMAN  | 0.923 |
| MTHFS_HUMAN | 0.256 | CD014_HUMAN | 0.590 | MFN2_HUMAN  | 0.923 |
| MMAA_HUMAN  | 0.257 | ALBU_HUMAN  | 0.591 | TRIO_HUMAN  | 0.924 |
| BPL1_HUMAN  | 0.258 | GRP78_HUMAN | 0.591 | ARAP2_HUMAN | 0.925 |
| SYPM_HUMAN  | 0.259 | PTGES_HUMAN | 0.592 | CF203_HUMAN | 0.926 |
| GRHPR_HUMAN | 0.259 | GRIK2_HUMAN | 0.593 | PREP_HUMAN  | 0.927 |
| GCST_HUMAN  | 0.260 | SIAS_HUMAN  | 0.594 | MIRO2_HUMAN | 0.927 |
| SYCM_HUMAN  | 0.261 | ARAF_HUMAN  | 0.595 | BNIP3_HUMAN | 0.928 |
| PGK2_HUMAN  | 0.262 | PANK1_HUMAN | 0.595 | MIRO1_HUMAN | 0.929 |
| DPOG1_HUMAN | 0.263 | HSP7C_HUMAN | 0.596 | BLK_HUMAN   | 0.930 |
| MPV17_HUMAN | 0.263 | ACO13_HUMAN | 0.597 | 3BHS2_HUMAN | 0.931 |
| VPP1_HUMAN  | 0.264 | UBE3A_HUMAN | 0.598 | MARH5_HUMAN | 0.931 |
| ATPG_HUMAN  | 0.265 | BAK_HUMAN   | 0.599 | CDGAP_HUMAN | 0.932 |
| RF1ML_HUMAN | 0.266 | GLRX3_HUMAN | 0.599 | UBIQ_HUMAN  | 0.933 |
| RRFM_HUMAN  | 0.267 | MGST3_HUMAN | 0.600 | RHG08_HUMAN | 0.934 |
| GPAT1_HUMAN | 0.267 | CY24B_HUMAN | 0.601 | GHITM_HUMAN | 0.935 |
| SYWC_HUMAN  | 0.268 | RT23_HUMAN  | 0.602 | MFF_HUMAN   | 0.935 |
| SYEP_HUMAN  | 0.269 | TRAP1_HUMAN | 0.603 | HNRPK_HUMAN | 0.936 |
| AMACR_HUMAN | 0.270 | SPTB2_HUMAN | 0.603 | HINFP_HUMAN | 0.937 |
| ACOT8_HUMAN | 0.271 | MOT1_HUMAN  | 0.604 | NMES1_HUMAN | 0.938 |
| DHB12_HUMAN | 0.271 | TRNT1_HUMAN | 0.605 | DJC11_HUMAN | 0.939 |
| DHRS4_HUMAN | 0.272 | TRXR2_HUMAN | 0.606 | B2L10_HUMAN | 0.939 |
| GCSH_HUMAN  | 0.273 | PEX5R_HUMAN | 0.607 | SYAM_HUMAN  | 0.941 |
| RDH13_HUMAN | 0.274 | PSTK_HUMAN  | 0.607 | K0564_HUMAN | 0.941 |
| PECR_HUMAN  | 0.275 | FTMT_HUMAN  | 0.608 | BAX_HUMAN   | 0.942 |
| PUR2_HUMAN  | 0.275 | GTR1_HUMAN  | 0.609 | MRS2_HUMAN  | 0.943 |
| COQ6_HUMAN  | 0.276 | DHI1_HUMAN  | 0.610 | RM36_HUMAN  | 0.943 |
| AL7A1_HUMAN | 0.277 | GDC_HUMAN   | 0.611 | NCBP1_HUMAN | 0.944 |
| AL3A2_HUMAN | 0.278 | GMPPA_HUMAN | 0.611 | BAD_HUMAN   | 0.945 |
| VATE1_HUMAN | 0.279 | LYSC_HUMAN  | 0.612 | DDX23_HUMAN | 0.946 |
| SYYM_HUMAN  | 0.279 | NEIL2_HUMAN | 0.613 | ABCE1_HUMAN | 0.947 |
| RM13_HUMAN  | 0.280 | SEBP2_HUMAN | 0.614 | TMM11_HUMAN | 0.947 |
| TPIS_HUMAN  | 0.281 | RRMJ2_HUMAN | 0.615 | PRP6_HUMAN  | 0.948 |
| AADAT_HUMAN | 0.282 | ABCB8_HUMAN | 0.615 | RS14_HUMAN  | 0.949 |
| SYTM_HUMAN  | 0.283 | THG1_HUMAN  | 0.616 | PCKGM_HUMAN | 0.950 |
| THTR_HUMAN  | 0.283 | CDS2_HUMAN  | 0.617 | BMF_HUMAN   | 0.951 |
| ETFD_HUMAN  | 0.284 | CDS1_HUMAN  | 0.618 | ZADH2_HUMAN | 0.951 |
| TYPH_HUMAN  | 0.285 | HSPB8_HUMAN | 0.619 | RS3A_HUMAN  | 0.952 |
| FRDA_HUMAN  | 0.286 | PPID_HUMAN  | 0.619 | TOM6_HUMAN  | 0.953 |
| AL9A1_HUMAN | 0.287 | RTN4_HUMAN  | 0.620 | RL5_HUMAN   | 0.954 |
| GTPBA_HUMAN | 0.287 | RT36_HUMAN  | 0.621 | SPNS1_HUMAN | 0.955 |
| RF1M_HUMAN  | 0.288 | GRPE2_HUMAN | 0.622 | RS13_HUMAN  | 0.955 |
| ECH1_HUMAN  | 0.289 | LX15B_HUMAN | 0.623 | K0664_HUMAN | 0.956 |
| RPOM_HUMAN  | 0.290 | TCPH_HUMAN  | 0.623 | TM14C_HUMAN | 0.957 |
| AL3A1_HUMAN | 0.291 | STOM_HUMAN  | 0.624 | RL11_HUMAN  | 0.958 |
| PHLP1_HUMAN | 0.291 | PINK1_HUMAN | 0.625 | ERF1_HUMAN  | 0.959 |
| GLCTK_HUMAN | 0.292 | APR_HUMAN   | 0.626 | RS15A_HUMAN | 0.959 |
| DPS1_HUMAN  | 0.293 | IRK8_HUMAN  | 0.626 | RSSA_HUMAN  | 0.960 |
| GUF1_HUMAN  | 0.294 | DHB1_HUMAN  | 0.627 | RL3_HUMAN   | 0.961 |
| MMAB_HUMAN  | 0.294 | CATB_HUMAN  | 0.628 | RS16_HUMAN  | 0.962 |
| SYTC_HUMAN  | 0.295 | NF1_HUMAN   | 0.629 | RS2_HUMAN   | 0.962 |
| M2OM_HUMAN  | 0.296 | A1AT_HUMAN  | 0.630 | RS20_HUMAN  | 0.963 |
| PGM2_HUMAN  | 0.297 | HIRA_HUMAN  | 0.630 | RS15_HUMAN  | 0.964 |
| CT007_HUMAN | 0.298 | RM42_HUMAN  | 0.631 | RS18_HUMAN  | 0.965 |
| AL1A3_HUMAN | 0.298 | DDAH1_HUMAN | 0.632 | RL23_HUMAN  | 0.966 |
| COQ7_HUMAN  | 0.299 | RNH1_HUMAN  | 0.633 | BNI3L_HUMAN | 0.966 |
| KMO_HUMAN   | 0.300 | GHC1_HUMAN  | 0.634 | RS23_HUMAN  | 0.967 |
| NLTP_HUMAN  | 0.301 | VDAC3_HUMAN | 0.634 | RS5_HUMAN   | 0.968 |
| ATOX1_HUMAN | 0.302 | TERA_HUMAN  | 0.635 | RS24_HUMAN  | 0.969 |
| OTC_HUMAN   | 0.302 | S22A4_HUMAN | 0.636 | RL9_HUMAN   | 0.970 |

|             |       |             |       |             |       |
|-------------|-------|-------------|-------|-------------|-------|
| CPSM_HUMAN  | 0.303 | VHL_HUMAN   | 0.637 | RL27A_HUMAN | 0.970 |
| ORNT2_HUMAN | 0.304 | HBA_HUMAN   | 0.638 | MRRP3_HUMAN | 0.971 |
| GLSL_HUMAN  | 0.305 | IDE_HUMAN   | 0.638 | IF2P_HUMAN  | 0.972 |
| UCP1_HUMAN  | 0.306 | TCPZ_HUMAN  | 0.639 | RL35A_HUMAN | 0.973 |
| DCE1_HUMAN  | 0.306 | FXRD1_HUMAN | 0.640 | RL12_HUMAN  | 0.974 |
| VPP2_HUMAN  | 0.307 | EF1G_HUMAN  | 0.641 | RL10A_HUMAN | 0.974 |
| KPYM_HUMAN  | 0.308 | NUA4L_HUMAN | 0.642 | RT10_HUMAN  | 0.975 |
| NB5R3_HUMAN | 0.309 | CP2CJ_HUMAN | 0.642 | RL34_HUMAN  | 0.976 |
| PHB_HUMAN   | 0.310 | ECSIT_HUMAN | 0.643 | BR44_HUMAN  | 0.977 |
| SYIC_HUMAN  | 0.310 | KCRM_HUMAN  | 0.644 | RM49_HUMAN  | 0.978 |
| MTRR_HUMAN  | 0.311 | TPP1_HUMAN  | 0.645 | RT24_HUMAN  | 0.978 |
| UCP3_HUMAN  | 0.312 | APEX1_HUMAN | 0.646 | RM27_HUMAN  | 0.979 |
| RT02_HUMAN  | 0.313 | ASXL2_HUMAN | 0.646 | FKBP8_HUMAN | 0.980 |
| ISCU_HUMAN  | 0.314 | THOP1_HUMAN | 0.647 | KITH_HUMAN  | 0.981 |
| BAAT_HUMAN  | 0.314 | NUDT5_HUMAN | 0.648 | MFN1_HUMAN  | 0.982 |
| PROSC_HUMAN | 0.315 | ANXA2_HUMAN | 0.649 | B2L14_HUMAN | 0.982 |
| AL3B1_HUMAN | 0.316 | NIF3L_HUMAN | 0.650 | CU057_HUMAN | 0.983 |
| XPP3_HUMAN  | 0.317 | OGG1_HUMAN  | 0.650 | AOFA_HUMAN  | 0.984 |
| TFB2M_HUMAN | 0.318 | HELC1_HUMAN | 0.651 | KAD3_HUMAN  | 0.985 |
| TFB1M_HUMAN | 0.318 | RT22_HUMAN  | 0.652 | ETFA_HUMAN  | 0.986 |
| HACL1_HUMAN | 0.319 | RIR2_HUMAN  | 0.653 | SEC20_HUMAN | 0.986 |
| VPP3_HUMAN  | 0.320 | BID_HUMAN   | 0.654 | HXK1_HUMAN  | 0.987 |
| SYLC_HUMAN  | 0.321 | HSP71_HUMAN | 0.654 | STAR_HUMAN  | 0.988 |
| HEM6_HUMAN  | 0.322 | BACH_HUMAN  | 0.655 | B2CL1_HUMAN | 0.989 |
| CX4NB_HUMAN | 0.322 | RM40_HUMAN  | 0.656 | GSTK1_HUMAN | 0.990 |
| TIM8A_HUMAN | 0.323 | CBAA1_HUMAN | 0.657 | MGST1_HUMAN | 0.990 |
| ADAS_HUMAN  | 0.324 | MLXIP_HUMAN | 0.658 | ADT2_HUMAN  | 0.991 |
| SUOX_HUMAN  | 0.325 | NTHL1_HUMAN | 0.658 | ARMC4_HUMAN | 0.992 |
| DPOG2_HUMAN | 0.326 | SMC7L_HUMAN | 0.659 | KIF1B_HUMAN | 0.993 |
| CCHL_HUMAN  | 0.326 | PTCD3_HUMAN | 0.660 | BCL2_HUMAN  | 0.994 |
| HEM4_HUMAN  | 0.327 | YMEL1_HUMAN | 0.661 | TPIP1_HUMAN | 0.994 |
| CCS_HUMAN   | 0.328 | PGAM5_HUMAN | 0.662 | HXK2_HUMAN  | 0.995 |
| AASS_HUMAN  | 0.329 | BIG1_HUMAN  | 0.662 | NDKM_HUMAN  | 0.996 |
| SPTC3_HUMAN | 0.330 | PRLD1_HUMAN | 0.663 | C1QBP_HUMAN | 0.997 |
| ISCA1_HUMAN | 0.330 | DJC30_HUMAN | 0.664 | SPG7_HUMAN  | 0.998 |
| RSAD1_HUMAN | 0.331 | HDHD3_HUMAN | 0.666 | SHC1_HUMAN  | 0.998 |
| ADX_HUMAN   | 0.332 | NB5R2_HUMAN | 0.666 | PAPD1_HUMAN | 1.000 |
| BODG_HUMAN  | 0.333 | PHIPL_HUMAN | 0.666 | IMP2L_HUMAN | 1.000 |

**Table S2.** Balanced Accuracy, Specificity, and Sensitivity of database overlap

| Database          | Balanced Accuracy | Specificity | Sensitivity | Count       |
|-------------------|-------------------|-------------|-------------|-------------|
| <b>MoreThan_2</b> | <b>0.949</b>      | <b>0.97</b> | <b>0.93</b> | <b>1217</b> |
| MoreThan_3        | 0.947             | 0.99        | 0.91        | 929         |
| MoreThan_4        | 0.939             | 0.99        | 0.89        | 775         |
| MoreThan_1        | 0.928             | 0.91        | 0.94        | 2374        |
| MoreThan_5        | 0.916             | 0.99        | 0.84        | 651         |
| MoreThan_6        | 0.890             | 1.00        | 0.78        | 541         |
| MoreThan_7        | 0.852             | 1.00        | 0.71        | 454         |
| MoreThan_8        | 0.761             | 1.00        | 0.52        | 314         |
| MoreThan_9        | 0.599             | 1.00        | 0.20        | 117         |

| Database          | Balanced Accuracy | Specificity | Sensitivity | Count       |
|-------------------|-------------------|-------------|-------------|-------------|
| <b>MoreThan_2</b> | <b>0.949</b>      | <b>0.97</b> | <b>0.93</b> | <b>1217</b> |
| MitoP2svm         | 0.926             | 0.97        | 0.88        | 1295        |
| ConLoc            | 0.921             | 0.99        | 0.85        | 861         |
| Maestro           | 0.918             | 0.98        | 0.85        | 948         |
| MitoCarta         | 0.915             | 0.98        | 0.85        | 980         |
| MitoRes           | 0.905             | 1.00        | 0.81        | 593         |
| HMPDb             | 0.858             | 1.00        | 0.72        | 502         |
| LOCATE            | 0.835             | 0.99        | 0.69        | 707         |
| MitoProteome      | 0.825             | 0.98        | 0.67        | 679         |
| Yeast             | 0.676             | 0.97        | 0.38        | 807         |



**Table S3.** Pair-wise comparisons of mitochondrial protein databases with overlap counts.

|                      | LOCATE     | ConLoc     | Yeast      | MitoP2svm   | MitoCarta  | MitoRes    | MitoProteome | Maestro    | HMPDb      | Protiens counted more than twice |
|----------------------|------------|------------|------------|-------------|------------|------------|--------------|------------|------------|----------------------------------|
| <b>LOCATE</b>        | 707        | 0.57       | 0.30       | 0.58        | 0.61       | 0.65       | 0.50         | 0.60       | 0.60       | <b>0.84</b>                      |
| <b>ConLoc</b>        | 443        | 861        | 0.39       | 0.66        | 0.67       | 0.73       | 0.56         | 0.69       | 0.71       | <b>0.87</b>                      |
| <b>Yeast</b>         | 227        | 321        | 807        | 0.38        | 0.39       | 0.34       | 0.28         | 0.38       | 0.34       | <b>0.53</b>                      |
| <b>MitoP2svm</b>     | 527        | 678        | 373        | 1295        | 0.67       | 0.68       | 0.55         | 0.80       | 0.66       | <b>0.80</b>                      |
| <b>MitoCarta</b>     | 501        | 617        | 341        | 750         | 980        | 0.69       | 0.56         | 0.73       | 0.66       | <b>0.88</b>                      |
| <b>MitoRes</b>       | 422        | 515        | 233        | 552         | 507        | 593        | 0.62         | 0.71       | 0.85       | <b>0.98</b>                      |
| <b>MitoProteome</b>  | 344        | 422        | 210        | 492         | 449        | 390        | 679          | 0.58       | 0.68       | <b>0.79</b>                      |
| <b>Maestro</b>       | 483        | 620        | 333        | 877         | 703        | 520        | 456          | 948        | 0.72       | <b>0.98</b>                      |
| <b>HMPDb</b>         | 355        | 449        | 209        | 481         | 437        | 463        | 392          | 475        | 502        | <b>1.00</b>                      |
| <b>Overlap Count</b> | <b>596</b> | <b>747</b> | <b>429</b> | <b>1041</b> | <b>859</b> | <b>579</b> | <b>538</b>   | <b>926</b> | <b>500</b> |                                  |

**Table S4.** Sources of mitochondrial proteins, integration information, and annotated localizations

| Swissprot ID | ConLoc | HMPDb | LOCATE | Maestro | MitoCarta | MitoP2svm | MitoProteome | MitoRes | Yeast MT | Components Types | Localization (swissprot 57.12) |
|--------------|--------|-------|--------|---------|-----------|-----------|--------------|---------|----------|------------------|--------------------------------|
| AATM_HUMAN   | 1      | 1     | 1      | 1       | 1         | 1         | 1            | 1       | 1        | Primary          |                                |
| ABCBA_HUMAN  | 1      | 1     | 1      | 1       | 1         | 1         | 1            | 1       | 1        | Primary          | imm, mit                       |
| ACON_HUMAN   | 1      | 1     | 1      | 1       | 1         | 1         | 1            | 1       | 1        | Primary          |                                |
| ACPM_HUMAN   | 1      | 1     | 1      | 1       | 1         | 1         | 1            | 1       | 1        | Primary          | mit                            |
| ADT4_HUMAN   | 1      | 1     | 1      | 1       | 1         | 1         | 1            | 1       | 1        | Primary          | imm, mit                       |
| AFG32_HUMAN  | 1      | 1     | 1      | 1       | 1         | 1         | 1            | 1       | 1        | Primary          | mit                            |
| AL1B1_HUMAN  | 1      | 1     | 1      | 1       | 1         | 1         | 1            | 1       | 1        | Primary          | mit, mm                        |
| AL4A1_HUMAN  | 1      | 1     | 1      | 1       | 1         | 1         | 1            | 1       | 1        | Primary          | mit, mm                        |
| ALDH2_HUMAN  | 1      | 1     | 1      | 1       | 1         | 1         | 1            | 1       | 1        | Primary          | mit, mm                        |
| AT5F1_HUMAN  | 1      | 1     | 1      | 1       | 1         | 1         | 1            | 1       | 1        | Primary          | imm, mit                       |
| AT5G3_HUMAN  | 1      | 1     | 1      | 1       | 1         | 1         | 1            | 1       | 1        | Primary          | mit                            |
| ATIF1_HUMAN  | 1      | 1     | 1      | 1       | 1         | 1         | 1            | 1       | 1        | Primary          | mit                            |
| ATPA_HUMAN   | 1      | 1     | 1      | 1       | 1         | 1         | 1            | 1       | 1        | Primary          | imm, mit                       |
| ATPB_HUMAN   | 1      | 1     | 1      | 1       | 1         | 1         | 1            | 1       | 1        | Primary          | imm, mit                       |
| ATPD_HUMAN   | 1      | 1     | 1      | 1       | 1         | 1         | 1            | 1       | 1        | Primary          | imm, mit                       |
| ATPG_HUMAN   | 1      | 1     | 1      | 1       | 1         | 1         | 1            | 1       | 1        | Primary          |                                |
| ATPO_HUMAN   | 1      | 1     | 1      | 1       | 1         | 1         | 1            | 1       | 1        | Primary          |                                |
| BCKD_HUMAN   | 1      | 1     | 1      | 1       | 1         | 1         | 1            | 1       | 1        | Primary          | mit, mm                        |
| BCS1_HUMAN   | 1      | 1     | 1      | 1       | 1         | 1         | 1            | 1       | 1        | Primary          | imm, mit                       |
| C1QBP_HUMAN  | 1      | 1     | 1      | 1       | 1         | 1         | 1            | 1       | 1        | Primary          | mit, mm                        |
| C560_HUMAN   | 1      | 1     | 1      | 1       | 1         | 1         | 1            | 1       | 1        | Primary          | imm, mit                       |
| CACP_HUMAN   | 1      | 1     | 1      | 1       | 1         | 1         | 1            | 1       | 1        | Primary          |                                |
| CH60_HUMAN   | 1      | 1     | 1      | 1       | 1         | 1         | 1            | 1       | 1        | Primary          | mit, mm                        |
| CLPX_HUMAN   | 1      | 1     | 1      | 1       | 1         | 1         | 1            | 1       | 1        | Primary          | mit                            |
| CMC2_HUMAN   | 1      | 1     | 1      | 1       | 1         | 1         | 1            | 1       | 1        | Primary          | imm, mit                       |
| COX10_HUMAN  | 1      | 1     | 1      | 1       | 1         | 1         | 1            | 1       | 1        | Primary          | mit                            |
| COX11_HUMAN  | 1      | 1     | 1      | 1       | 1         | 1         | 1            | 1       | 1        | Primary          | imm, mit                       |
| COX15_HUMAN  | 1      | 1     | 1      | 1       | 1         | 1         | 1            | 1       | 1        | Primary          | mit                            |
| COX5A_HUMAN  | 1      | 1     | 1      | 1       | 1         | 1         | 1            | 1       | 1        | Primary          | imm, mit                       |
| COX7C_HUMAN  | 1      | 1     | 1      | 1       | 1         | 1         | 1            | 1       | 1        | Primary          |                                |
| CPT2_HUMAN   | 1      | 1     | 1      | 1       | 1         | 1         | 1            | 1       | 1        | Primary          | imm, mit                       |
| CY1_HUMAN    | 1      | 1     | 1      | 1       | 1         | 1         | 1            | 1       | 1        | Primary          | imm, mit                       |
| CYB5B_HUMAN  | 1      | 1     | 1      | 1       | 1         | 1         | 1            | 1       | 1        | Primary          |                                |
| CYC_HUMAN    | 1      | 1     | 1      | 1       | 1         | 1         | 1            | 1       | 1        | Primary          | mit, mm                        |
| DHSA_HUMAN   | 1      | 1     | 1      | 1       | 1         | 1         | 1            | 1       | 1        | Primary          | imm, mit                       |
| DHSB_HUMAN   | 1      | 1     | 1      | 1       | 1         | 1         | 1            | 1       | 1        | Primary          | imm, mit                       |
| DLDH_HUMAN   | 1      | 1     | 1      | 1       | 1         | 1         | 1            | 1       | 1        | Primary          | mit, mm                        |
| EFTU_HUMAN   | 1      | 1     | 1      | 1       | 1         | 1         | 1            | 1       | 1        | Primary          | mit                            |
| ETFA_HUMAN   | 1      | 1     | 1      | 1       | 1         | 1         | 1            | 1       | 1        | Primary          | mit, mm                        |
| ETFB_HUMAN   | 1      | 1     | 1      | 1       | 1         | 1         | 1            | 1       | 1        | Primary          | mit, mm                        |
| FOLC_HUMAN   | 1      | 1     | 1      | 1       | 1         | 1         | 1            | 1       | 1        | Primary          | cyt, mit                       |
| FUMH_HUMAN   | 1      | 1     | 1      | 1       | 1         | 1         | 1            | 1       | 1        | Primary          | cyt                            |
| GCST_HUMAN   | 1      | 1     | 1      | 1       | 1         | 1         | 1            | 1       | 1        | Primary          | mit                            |
| GPDM_HUMAN   | 1      | 1     | 1      | 1       | 1         | 1         | 1            | 1       | 1        | Primary          | mit                            |
| GRP75_HUMAN  | 1      | 1     | 1      | 1       | 1         | 1         | 1            | 1       | 1        | Primary          | mit                            |
| GRPE1_HUMAN  | 1      | 1     | 1      | 1       | 1         | 1         | 1            | 1       | 1        | Primary          | mit, mm                        |
| GSHR_HUMAN   | 1      | 1     | 1      | 1       | 1         | 1         | 1            | 1       | 1        | Primary          | cyt                            |
| HEM0_HUMAN   | 1      | 1     | 1      | 1       | 1         | 1         | 1            | 1       | 1        | Primary          | mit, mm                        |
| HEMH_HUMAN   | 1      | 1     | 1      | 1       | 1         | 1         | 1            | 1       | 1        | Primary          | imm, mit                       |
| IDH3A_HUMAN  | 1      | 1     | 1      | 1       | 1         | 1         | 1            | 1       | 1        | Primary          | mit                            |
| IDH3G_HUMAN  | 1      | 1     | 1      | 1       | 1         | 1         | 1            | 1       | 1        | Primary          | mit                            |
| IDHP_HUMAN   | 1      | 1     | 1      | 1       | 1         | 1         | 1            | 1       | 1        | Primary          | mit                            |
| IF2M_HUMAN   | 1      | 1     | 1      | 1       | 1         | 1         | 1            | 1       | 1        | Primary          | mit                            |
| IPYR2_HUMAN  | 1      | 1     | 1      | 1       | 1         | 1         | 1            | 1       | 1        | Primary          |                                |
| KAD2_HUMAN   | 1      | 1     | 1      | 1       | 1         | 1         | 1            | 1       | 1        | Primary          | mit, ims                       |
| KAD3_HUMAN   | 1      | 1     | 1      | 1       | 1         | 1         | 1            | 1       | 1        | Primary          |                                |
| LONM_HUMAN   | 1      | 1     | 1      | 1       | 1         | 1         | 1            | 1       | 1        | Primary          | mit, mm                        |
| MCAT_HUMAN   | 1      | 1     | 1      | 1       | 1         | 1         | 1            | 1       | 1        | Primary          | imm, mit                       |
| MDHM_HUMAN   | 1      | 1     | 1      | 1       | 1         | 1         | 1            | 1       | 1        | Primary          | mit, mm                        |
| MFRN1_HUMAN  | 1      | 1     | 1      | 1       | 1         | 1         | 1            | 1       | 1        | Primary          |                                |
| MIPEP_HUMAN  | 1      | 1     | 1      | 1       | 1         | 1         | 1            | 1       | 1        | Primary          | mit, mm                        |
| MPCP_HUMAN   | 1      | 1     | 1      | 1       | 1         | 1         | 1            | 1       | 1        | Primary          | imm, mit                       |
| MPPA_HUMAN   | 1      | 1     | 1      | 1       | 1         | 1         | 1            | 1       | 1        | Primary          |                                |
| NDUA9_HUMAN  | 1      | 1     | 1      | 1       | 1         | 1         | 1            | 1       | 1        | Primary          | mit, mm                        |
| OAT_HUMAN    | 1      | 1     | 1      | 1       | 1         | 1         | 1            | 1       | 1        | Primary          | mit, mm                        |
| ODO1_HUMAN   | 1      | 1     | 1      | 1       | 1         | 1         | 1            | 1       | 1        | Primary          | mit, mm                        |
| ODPA_HUMAN   | 1      | 1     | 1      | 1       | 1         | 1         | 1            | 1       | 1        | Primary          | mit, mm                        |
| ODPX_HUMAN   | 1      | 1     | 1      | 1       | 1         | 1         | 1            | 1       | 1        | Primary          | mit, mm                        |
| OGG1_HUMAN   | 1      | 1     | 1      | 1       | 1         | 1         | 1            | 1       | 1        | Primary          | mit                            |
| ORNT1_HUMAN  | 1      | 1     | 1      | 1       | 1         | 1         | 1            | 1       | 1        | Primary          | imm, mit                       |
| OXA1L_HUMAN  | 1      | 1     | 1      | 1       | 1         | 1         | 1            | 1       | 1        | Primary          | imm, mit                       |
| PDP2_HUMAN   | 1      | 1     | 1      | 1       | 1         | 1         | 1            | 1       | 1        | Primary          |                                |
| PPIF_HUMAN   | 1      | 1     | 1      | 1       | 1         | 1         | 1            | 1       | 1        | Primary          | mit, mm                        |
| QCR2_HUMAN   | 1      | 1     | 1      | 1       | 1         | 1         | 1            | 1       | 1        | Primary          | imm, mit                       |
| RM01_HUMAN   | 1      | 1     | 1      | 1       | 1         | 1         | 1            | 1       | 1        | Primary          | mit                            |
| RM03_HUMAN   | 1      | 1     | 1      | 1       | 1         | 1         | 1            | 1       | 1        | Primary          | mit                            |
| RM04_HUMAN   | 1      | 1     | 1      | 1       | 1         | 1         | 1            | 1       | 1        | Primary          |                                |
| RM11_HUMAN   | 1      | 1     | 1      | 1       | 1         | 1         | 1            | 1       | 1        | Primary          | mit                            |
| RM12_HUMAN   | 1      | 1     | 1      | 1       | 1         | 1         | 1            | 1       | 1        | Primary          | mit                            |
| RM13_HUMAN   | 1      | 1     | 1      | 1       | 1         | 1         | 1            | 1       | 1        | Primary          | mit                            |
| RM16_HUMAN   | 1      | 1     | 1      | 1       | 1         | 1         | 1            | 1       | 1        | Primary          | mit                            |
| RM27_HUMAN   | 1      | 1     | 1      | 1       | 1         | 1         | 1            | 1       | 1        | Primary          | mit                            |

|             |   |   |   |   |   |   |   |   |   |         |               |
|-------------|---|---|---|---|---|---|---|---|---|---------|---------------|
| RM32_HUMAN  | 1 | 1 | 1 | 1 | 1 | 1 | 1 | 1 | 1 | Primary | mit           |
| RM34_HUMAN  | 1 | 1 | 1 | 1 | 1 | 1 | 1 | 1 | 1 | Primary |               |
| RM36_HUMAN  | 1 | 1 | 1 | 1 | 1 | 1 | 1 | 1 | 1 | Primary | mit           |
| RM44_HUMAN  | 1 | 1 | 1 | 1 | 1 | 1 | 1 | 1 | 1 | Primary | mit           |
| RM49_HUMAN  | 1 | 1 | 1 | 1 | 1 | 1 | 1 | 1 | 1 | Primary | mit           |
| RPOM_HUMAN  | 1 | 1 | 1 | 1 | 1 | 1 | 1 | 1 | 1 | Primary | mit           |
| RT02_HUMAN  | 1 | 1 | 1 | 1 | 1 | 1 | 1 | 1 | 1 | Primary | mit           |
| RT05_HUMAN  | 1 | 1 | 1 | 1 | 1 | 1 | 1 | 1 | 1 | Primary | mit           |
| RT09_HUMAN  | 1 | 1 | 1 | 1 | 1 | 1 | 1 | 1 | 1 | Primary | mit           |
| RT11_HUMAN  | 1 | 1 | 1 | 1 | 1 | 1 | 1 | 1 | 1 | Primary | mit           |
| RT12_HUMAN  | 1 | 1 | 1 | 1 | 1 | 1 | 1 | 1 | 1 | Primary | mit           |
| RT14_HUMAN  | 1 | 1 | 1 | 1 | 1 | 1 | 1 | 1 | 1 | Primary | mit           |
| RT15_HUMAN  | 1 | 1 | 1 | 1 | 1 | 1 | 1 | 1 | 1 | Primary | mit           |
| RT18C_HUMAN | 1 | 1 | 1 | 1 | 1 | 1 | 1 | 1 | 1 | Primary | mit           |
| RT21_HUMAN  | 1 | 1 | 1 | 1 | 1 | 1 | 1 | 1 | 1 | Primary | mit           |
| RT23_HUMAN  | 1 | 1 | 1 | 1 | 1 | 1 | 1 | 1 | 1 | Primary | mit           |
| RT27_HUMAN  | 1 | 1 | 1 | 1 | 1 | 1 | 1 | 1 | 1 | Primary | mit           |
| SODM_HUMAN  | 1 | 1 | 1 | 1 | 1 | 1 | 1 | 1 | 1 | Primary | mit, mm       |
| SQRD_HUMAN  | 1 | 1 | 1 | 1 | 1 | 1 | 1 | 1 | 1 | Primary |               |
| SSBP_HUMAN  | 1 | 1 | 1 | 1 | 1 | 1 | 1 | 1 | 1 | Primary | mit           |
| SURF1_HUMAN | 1 | 1 | 1 | 1 | 1 | 1 | 1 | 1 | 1 | Primary |               |
| SYWM_HUMAN  | 1 | 1 | 1 | 1 | 1 | 1 | 1 | 1 | 1 | Primary | mit, mm       |
| TI17B_HUMAN | 1 | 1 | 1 | 1 | 1 | 1 | 1 | 1 | 1 | Primary | imm, mit      |
| TIM13_HUMAN | 1 | 1 | 1 | 1 | 1 | 1 | 1 | 1 | 1 | Primary | imm, mit      |
| TIM22_HUMAN | 1 | 1 | 1 | 1 | 1 | 1 | 1 | 1 | 1 | Primary |               |
| TIM23_HUMAN | 1 | 1 | 1 | 1 | 1 | 1 | 1 | 1 | 1 | Primary |               |
| TIM44_HUMAN | 1 | 1 | 1 | 1 | 1 | 1 | 1 | 1 | 1 | Primary | imm, mit      |
| TIM8A_HUMAN | 1 | 1 | 1 | 1 | 1 | 1 | 1 | 1 | 1 | Primary | imm, mit      |
| TIM9_HUMAN  | 1 | 1 | 1 | 1 | 1 | 1 | 1 | 1 | 1 | Primary | imm, mit      |
| TOM20_HUMAN | 1 | 1 | 1 | 1 | 1 | 1 | 1 | 1 | 1 | Primary |               |
| TOM70_HUMAN | 1 | 1 | 1 | 1 | 1 | 1 | 1 | 1 | 1 | Primary |               |
| UCP2_HUMAN  | 1 | 1 | 1 | 1 | 1 | 1 | 1 | 1 | 1 | Primary | imm, mit      |
| UCRI_HUMAN  | 1 | 1 | 1 | 1 | 1 | 1 | 1 | 1 | 1 | Primary | imm, mit      |
| UNG_HUMAN   | 1 | 1 | 1 | 1 | 1 | 1 | 1 | 1 | 1 | Primary | nuc           |
| VDAC1_HUMAN | 1 | 1 | 1 | 1 | 1 | 1 | 1 | 1 | 1 | Primary | mem, omm, mit |
| 3BHS1_HUMAN | 1 | 1 | 1 | 1 | 1 | 1 | 1 | 1 | 0 | Primary | end, mit      |
| 3HIDH_HUMAN | 1 | 1 | 1 | 1 | 1 | 1 | 1 | 1 | 0 | Primary | mit           |
| ABCB6_HUMAN | 1 | 1 | 1 | 1 | 1 | 1 | 1 | 1 | 0 | Primary | omm, mit      |
| ABCB7_HUMAN | 1 | 1 | 1 | 0 | 1 | 1 | 1 | 1 | 1 | Primary |               |
| ACADS_HUMAN | 1 | 1 | 1 | 1 | 1 | 1 | 1 | 1 | 0 | Primary | mit, mm       |
| ACADV_HUMAN | 1 | 1 | 1 | 1 | 1 | 1 | 1 | 1 | 0 | Primary | imm, mit      |
| ACDSB_HUMAN | 1 | 1 | 1 | 1 | 1 | 1 | 1 | 1 | 0 | Primary | mit, mm       |
| ADT1_HUMAN  | 1 | 1 | 1 | 1 | 1 | 1 | 1 | 1 | 0 | Primary | imm, mit      |
| ADT2_HUMAN  | 1 | 1 | 1 | 1 | 1 | 1 | 1 | 1 | 0 | Primary | imm, mit      |
| ADT3_HUMAN  | 1 | 1 | 0 | 1 | 1 | 1 | 1 | 1 | 1 | Primary | imm, mit      |
| ADX_HUMAN   | 1 | 1 | 1 | 1 | 1 | 1 | 1 | 1 | 0 | Primary | mit, mm       |
| AIFM1_HUMAN | 1 | 1 | 1 | 1 | 1 | 1 | 1 | 1 | 0 | Primary | mit, ims, nuc |
| AKA10_HUMAN | 1 | 1 | 1 | 1 | 1 | 1 | 1 | 1 | 0 | Primary | cyt, mit      |
| AKAP1_HUMAN | 1 | 1 | 1 | 1 | 1 | 1 | 1 | 1 | 0 | Primary |               |
| AOFA_HUMAN  | 1 | 1 | 1 | 1 | 1 | 1 | 1 | 1 | 0 | Primary | cyt, omm, mit |
| AOFB_HUMAN  | 1 | 1 | 1 | 1 | 1 | 1 | 1 | 1 | 0 | Primary | cyt, omm, mit |
| ARGI2_HUMAN | 1 | 1 | 1 | 1 | 1 | 1 | 1 | 1 | 0 | Primary | mit           |
| AT5G1_HUMAN | 1 | 1 | 1 | 1 | 1 | 1 | 1 | 1 | 0 | Primary | mit           |
| AT5G2_HUMAN | 1 | 1 | 1 | 1 | 1 | 1 | 1 | 1 | 0 | Primary | mit           |
| ATP5E_HUMAN | 1 | 0 | 1 | 1 | 1 | 1 | 1 | 1 | 1 | Primary | imm, mit      |
| ATP5H_HUMAN | 1 | 1 | 0 | 1 | 1 | 1 | 1 | 1 | 1 | Primary | imm, mit      |
| ATP5L_HUMAN | 1 | 1 | 1 | 1 | 1 | 1 | 1 | 1 | 0 | Primary | imm, mit      |
| ATP5J_HUMAN | 1 | 1 | 1 | 1 | 1 | 1 | 1 | 1 | 0 | Primary | imm, mit      |
| ATP5L_HUMAN | 1 | 0 | 1 | 1 | 1 | 1 | 1 | 1 | 1 | Primary | imm, mit      |
| ATPK_HUMAN  | 1 | 1 | 1 | 1 | 1 | 1 | 1 | 1 | 0 | Primary | imm, mit      |
| B2L13_HUMAN | 1 | 1 | 1 | 1 | 1 | 1 | 1 | 1 | 0 | Primary |               |
| BAD_HUMAN   | 1 | 1 | 1 | 1 | 1 | 1 | 1 | 1 | 0 | Primary | cyt, omm, mit |
| BCAT2_HUMAN | 1 | 1 | 1 | 1 | 1 | 1 | 1 | 1 | 0 | Primary | cyt           |
| BCL2_HUMAN  | 1 | 1 | 1 | 1 | 1 | 1 | 1 | 1 | 0 | Primary | omm, mit, nuc |
| C11B1_HUMAN | 1 | 1 | 1 | 1 | 1 | 1 | 1 | 1 | 0 | Primary | mit           |
| C11B2_HUMAN | 1 | 1 | 1 | 1 | 1 | 1 | 1 | 1 | 0 | Primary | mit           |
| CAH5A_HUMAN | 1 | 1 | 1 | 1 | 1 | 1 | 1 | 1 | 0 | Primary | mit           |
| CAH5B_HUMAN | 1 | 1 | 1 | 1 | 1 | 1 | 1 | 1 | 0 | Primary | mit           |
| CCHL_HUMAN  | 1 | 1 | 0 | 1 | 1 | 1 | 1 | 1 | 1 | Primary |               |
| CH10_HUMAN  | 1 | 1 | 0 | 1 | 1 | 1 | 1 | 1 | 1 | Primary | mit, mm       |
| CISY_HUMAN  | 1 | 0 | 1 | 1 | 1 | 1 | 1 | 1 | 1 | Primary | mit, mm       |
| CLPP_HUMAN  | 1 | 1 | 1 | 1 | 1 | 1 | 1 | 1 | 0 | Primary | mit, mm       |
| CMC1_HUMAN  | 1 | 1 | 0 | 1 | 1 | 1 | 1 | 1 | 1 | Primary | imm, mit      |
| COQ3_HUMAN  | 1 | 1 | 0 | 1 | 1 | 1 | 1 | 1 | 1 | Primary |               |
| COX17_HUMAN | 1 | 1 | 0 | 1 | 1 | 1 | 1 | 1 | 1 | Primary |               |
| COX41_HUMAN | 1 | 1 | 1 | 1 | 1 | 1 | 1 | 1 | 0 | Primary | imm, mit      |
| COX5B_HUMAN | 1 | 1 | 0 | 1 | 1 | 1 | 1 | 1 | 1 | Primary | imm, mit      |
| COX6C_HUMAN | 1 | 1 | 1 | 1 | 1 | 1 | 1 | 1 | 0 | Primary | imm, mit      |
| COX7B_HUMAN | 1 | 1 | 1 | 1 | 1 | 1 | 1 | 1 | 0 | Primary |               |
| COX7R_HUMAN | 1 | 1 | 1 | 1 | 1 | 1 | 1 | 1 | 0 | Primary |               |
| CP27A_HUMAN | 1 | 1 | 1 | 1 | 1 | 1 | 1 | 1 | 0 | Primary | mit           |
| CP27B_HUMAN | 1 | 1 | 1 | 1 | 1 | 1 | 1 | 1 | 0 | Primary | mit           |
| CX6B1_HUMAN | 1 | 1 | 0 | 1 | 1 | 1 | 1 | 1 | 1 | Primary |               |
| D3D2_HUMAN  | 1 | 1 | 1 | 1 | 1 | 1 | 1 | 1 | 0 | Primary | mit, mm       |
| DBLOH_HUMAN | 1 | 1 | 1 | 1 | 1 | 1 | 1 | 1 | 0 | Primary | cyt, mit      |
| DCMC_HUMAN  | 1 | 1 | 1 | 1 | 1 | 1 | 1 | 1 | 0 | Primary | cyt, mit, per |
| DECR_HUMAN  | 1 | 1 | 1 | 1 | 1 | 1 | 1 | 1 | 0 | Primary | mit           |

|             |   |   |   |   |   |   |   |   |   |         |               |
|-------------|---|---|---|---|---|---|---|---|---|---------|---------------|
| DGUOK_HUMAN | 1 | 1 | 1 | 1 | 1 | 1 | 1 | 1 | 0 | Primary | mit           |
| DHE3_HUMAN  | 1 | 1 | 0 | 1 | 1 | 1 | 1 | 1 | 1 | Primary | mit, mm       |
| DNJA3_HUMAN | 1 | 1 | 1 | 1 | 1 | 1 | 0 | 1 | 1 | Primary | mit, mm       |
| DPOG1_HUMAN | 1 | 1 | 1 | 1 | 1 | 1 | 0 | 1 | 1 | Primary | mit           |
| ECHA_HUMAN  | 1 | 1 | 1 | 1 | 1 | 1 | 1 | 1 | 0 | Primary | mit           |
| ECHM_HUMAN  | 1 | 1 | 1 | 1 | 1 | 1 | 1 | 1 | 0 | Primary | mit, mm       |
| EFGM_HUMAN  | 1 | 1 | 1 | 1 | 1 | 1 | 0 | 1 | 1 | Primary |               |
| ES1_HUMAN   | 1 | 1 | 1 | 1 | 1 | 1 | 1 | 1 | 0 | Primary |               |
| ETFD_HUMAN  | 1 | 1 | 0 | 1 | 1 | 1 | 1 | 1 | 1 | Primary | imm, mit      |
| FMT_HUMAN   | 1 | 1 | 1 | 1 | 1 | 1 | 0 | 1 | 1 | Primary |               |
| FRDA_HUMAN  | 1 | 0 | 1 | 1 | 1 | 1 | 1 | 1 | 1 | Primary | mit           |
| GATB_HUMAN  | 1 | 1 | 0 | 1 | 1 | 1 | 1 | 1 | 1 | Primary | mit           |
| GATM_HUMAN  | 1 | 1 | 1 | 1 | 1 | 1 | 1 | 1 | 0 | Primary |               |
| GCDH_HUMAN  | 1 | 1 | 1 | 1 | 1 | 1 | 1 | 1 | 0 | Primary | mit, mm       |
| GLPK2_HUMAN | 0 | 1 | 1 | 1 | 1 | 1 | 1 | 1 | 1 | Primary |               |
| GPAT1_HUMAN | 1 | 1 | 1 | 1 | 1 | 1 | 1 | 1 | 0 | Primary |               |
| HEM1_HUMAN  | 1 | 1 | 1 | 1 | 1 | 1 | 1 | 1 | 0 | Primary | mit, mm       |
| HEM6_HUMAN  | 1 | 1 | 0 | 1 | 1 | 1 | 1 | 1 | 1 | Primary | mit, ims      |
| HMCS2_HUMAN | 1 | 1 | 1 | 1 | 1 | 1 | 1 | 1 | 0 | Primary | mit           |
| HMGCL_HUMAN | 1 | 1 | 1 | 1 | 1 | 1 | 1 | 1 | 0 | Primary | mit, mm       |
| HTRA2_HUMAN | 1 | 1 | 1 | 1 | 1 | 1 | 1 | 1 | 0 | Primary | mit, ims      |
| HXK2_HUMAN  | 1 | 1 | 1 | 1 | 1 | 1 | 1 | 1 | 0 | Primary |               |
| IMMT_HUMAN  | 1 | 1 | 1 | 1 | 1 | 1 | 1 | 1 | 0 | Primary | imm, mit      |
| IVD_HUMAN   | 1 | 1 | 1 | 1 | 1 | 1 | 1 | 1 | 0 | Primary | mit, mm       |
| KBL_HUMAN   | 1 | 1 | 1 | 1 | 1 | 1 | 1 | 1 | 0 | Primary |               |
| KCRU_HUMAN  | 1 | 1 | 1 | 1 | 1 | 1 | 1 | 1 | 0 | Primary | imm, mit      |
| KITM_HUMAN  | 1 | 1 | 1 | 1 | 1 | 1 | 1 | 1 | 0 | Primary | mit           |
| LETM1_HUMAN | 1 | 0 | 1 | 1 | 1 | 1 | 1 | 1 | 1 | Primary | imm, mit      |
| LIPT_HUMAN  | 1 | 0 | 1 | 1 | 1 | 1 | 1 | 1 | 1 | Primary | mit           |
| M2GD_HUMAN  | 1 | 1 | 1 | 1 | 1 | 1 | 1 | 1 | 0 | Primary | mit           |
| M2OM_HUMAN  | 1 | 1 | 1 | 1 | 1 | 1 | 1 | 1 | 0 | Primary | imm, mit      |
| MAOM_HUMAN  | 1 | 1 | 1 | 1 | 1 | 1 | 1 | 1 | 0 | Primary | mit, mm       |
| MAON_HUMAN  | 1 | 1 | 1 | 1 | 1 | 1 | 1 | 1 | 0 | Primary | mit, mm       |
| MCCA_HUMAN  | 1 | 1 | 0 | 1 | 1 | 1 | 1 | 1 | 1 | Primary | mit, mm       |
| MCCB_HUMAN  | 1 | 1 | 1 | 1 | 1 | 1 | 1 | 1 | 0 | Primary | mit, mm       |
| MFN2_HUMAN  | 1 | 1 | 1 | 1 | 1 | 1 | 0 | 1 | 1 | Primary | omm, mit      |
| MMSA_HUMAN  | 1 | 1 | 1 | 1 | 1 | 1 | 1 | 1 | 0 | Primary | mit           |
| MPPB_HUMAN  | 1 | 1 | 0 | 1 | 1 | 1 | 1 | 1 | 1 | Primary |               |
| MRS2_HUMAN  | 1 | 1 | 1 | 1 | 1 | 1 | 0 | 1 | 1 | Primary |               |
| MTCPA_HUMAN | 1 | 1 | 1 | 1 | 1 | 1 | 1 | 1 | 0 | Primary | mit           |
| MTDC_HUMAN  | 1 | 1 | 1 | 1 | 1 | 1 | 1 | 1 | 0 | Primary | mit           |
| MTERF_HUMAN | 1 | 1 | 1 | 1 | 1 | 1 | 1 | 1 | 0 | Primary | mit           |
| MTX1_HUMAN  | 1 | 1 | 1 | 1 | 1 | 0 | 1 | 1 | 1 | Primary |               |
| MTX2_HUMAN  | 1 | 1 | 1 | 1 | 1 | 1 | 1 | 1 | 0 | Primary | omm, mit      |
| NDKM_HUMAN  | 1 | 1 | 1 | 1 | 1 | 1 | 1 | 1 | 0 | Primary | mit, ims      |
| NDUA1_HUMAN | 1 | 1 | 1 | 1 | 1 | 1 | 1 | 1 | 0 | Primary | imm, mit      |
| NDUA2_HUMAN | 1 | 1 | 1 | 1 | 1 | 1 | 1 | 1 | 0 | Primary | imm, mit      |
| NDUA4_HUMAN | 1 | 1 | 1 | 1 | 1 | 1 | 1 | 1 | 0 | Primary | imm, mit      |
| NDUA5_HUMAN | 1 | 1 | 1 | 1 | 1 | 1 | 1 | 1 | 0 | Primary | imm, mit      |
| NDUA6_HUMAN | 1 | 1 | 1 | 1 | 1 | 1 | 1 | 1 | 0 | Primary | imm, mit      |
| NDUA7_HUMAN | 1 | 1 | 1 | 1 | 1 | 1 | 1 | 1 | 0 | Primary | imm, mit      |
| NDUA8_HUMAN | 1 | 1 | 1 | 1 | 1 | 1 | 1 | 1 | 0 | Primary | mit           |
| NDUAA_HUMAN | 1 | 1 | 1 | 1 | 1 | 1 | 1 | 1 | 0 | Primary | mit, mm       |
| NDUB5_HUMAN | 1 | 1 | 1 | 1 | 1 | 1 | 1 | 1 | 0 | Primary | imm, mit      |
| NDUB7_HUMAN | 1 | 1 | 1 | 1 | 1 | 1 | 1 | 1 | 0 | Primary | imm, mit      |
| NDUBA_HUMAN | 1 | 1 | 1 | 1 | 1 | 1 | 1 | 1 | 0 | Primary | imm, mit      |
| NDUS4_HUMAN | 1 | 1 | 1 | 1 | 1 | 1 | 1 | 1 | 0 | Primary | imm, mit      |
| NDUS5_HUMAN | 1 | 1 | 1 | 1 | 1 | 1 | 1 | 1 | 0 | Primary | imm, mit      |
| NDUS6_HUMAN | 1 | 1 | 1 | 1 | 1 | 1 | 1 | 1 | 0 | Primary | imm, mit      |
| NDUS7_HUMAN | 1 | 1 | 1 | 1 | 1 | 1 | 1 | 1 | 0 | Primary | mit           |
| NDUS8_HUMAN | 1 | 1 | 1 | 1 | 1 | 1 | 1 | 1 | 0 | Primary |               |
| NDUV2_HUMAN | 1 | 1 | 1 | 1 | 1 | 1 | 1 | 1 | 0 | Primary | imm, mit      |
| NDUV3_HUMAN | 1 | 1 | 1 | 1 | 1 | 1 | 1 | 1 | 0 | Primary | imm, mit      |
| NFS1_HUMAN  | 1 | 1 | 1 | 1 | 1 | 1 | 0 | 1 | 1 | Primary | cyt, mit      |
| NLTP_HUMAN  | 1 | 1 | 1 | 1 | 1 | 1 | 1 | 1 | 0 | Primary |               |
| NNTM_HUMAN  | 1 | 1 | 1 | 1 | 1 | 1 | 1 | 1 | 0 | Primary |               |
| NUCG_HUMAN  | 1 | 1 | 0 | 1 | 1 | 1 | 1 | 1 | 1 | Primary | mit           |
| ODB2_HUMAN  | 1 | 1 | 1 | 1 | 1 | 1 | 1 | 1 | 0 | Primary | mit, mm       |
| ODBA_HUMAN  | 1 | 1 | 1 | 1 | 1 | 1 | 1 | 1 | 0 | Primary | mit, mm       |
| ODBB_HUMAN  | 1 | 1 | 1 | 1 | 1 | 1 | 1 | 1 | 0 | Primary | mit, mm       |
| ODC_HUMAN   | 1 | 1 | 1 | 1 | 1 | 1 | 0 | 1 | 1 | Primary | imm, mit      |
| ODO2_HUMAN  | 1 | 1 | 1 | 1 | 1 | 1 | 0 | 1 | 1 | Primary | mit           |
| ODP2_HUMAN  | 1 | 1 | 0 | 1 | 1 | 1 | 1 | 1 | 1 | Primary | mit, mm       |
| ODPAT_HUMAN | 1 | 1 | 1 | 1 | 1 | 1 | 1 | 1 | 0 | Primary | mit, mm       |
| ODPB_HUMAN  | 1 | 1 | 0 | 1 | 1 | 1 | 1 | 1 | 1 | Primary | mit, mm       |
| ORNT2_HUMAN | 1 | 1 | 1 | 1 | 1 | 1 | 0 | 1 | 1 | Primary | imm, mit      |
| OTC_HUMAN   | 1 | 1 | 1 | 1 | 1 | 1 | 1 | 1 | 0 | Primary | mit, mm       |
| PCCA_HUMAN  | 1 | 1 | 1 | 1 | 1 | 1 | 1 | 1 | 0 | Primary | mit, mm       |
| PCKGM_HUMAN | 1 | 1 | 1 | 1 | 1 | 1 | 1 | 1 | 0 | Primary | mit           |
| PDK1_HUMAN  | 1 | 1 | 1 | 1 | 1 | 1 | 1 | 1 | 0 | Primary | mit, mm       |
| PDK3_HUMAN  | 1 | 1 | 1 | 1 | 1 | 1 | 1 | 1 | 0 | Primary | mit, mm       |
| PDK4_HUMAN  | 1 | 1 | 1 | 1 | 1 | 1 | 1 | 1 | 0 | Primary | mit, mm       |
| PPOX_HUMAN  | 1 | 1 | 0 | 1 | 1 | 1 | 1 | 1 | 1 | Primary |               |
| PRDX5_HUMAN | 1 | 1 | 1 | 1 | 1 | 1 | 1 | 1 | 0 | Primary | cyt, mit, per |
| PYC_HUMAN   | 1 | 1 | 1 | 1 | 1 | 1 | 1 | 1 | 0 | Primary | mit, mm       |
| QCR1_HUMAN  | 1 | 1 | 0 | 1 | 1 | 1 | 1 | 1 | 1 | Primary | imm, mit      |
| QCR10_HUMAN | 1 | 1 | 1 | 1 | 1 | 1 | 1 | 1 | 0 | Primary | imm, mit      |

|             |   |   |   |   |   |   |   |   |   |         |               |
|-------------|---|---|---|---|---|---|---|---|---|---------|---------------|
| QCR6_HUMAN  | 1 | 1 | 0 | 1 | 1 | 1 | 1 | 1 | 1 | Primary | imm, mit      |
| QCR7_HUMAN  | 1 | 1 | 0 | 1 | 1 | 1 | 1 | 1 | 1 | Primary | imm, mit      |
| QCR9_HUMAN  | 1 | 1 | 0 | 1 | 1 | 1 | 1 | 1 | 1 | Primary |               |
| RF1ML_HUMAN | 1 | 1 | 1 | 1 | 1 | 1 | 0 | 1 | 1 | Primary | mit           |
| RM02_HUMAN  | 1 | 1 | 1 | 1 | 1 | 1 | 0 | 1 | 1 | Primary |               |
| RM09_HUMAN  | 1 | 1 | 1 | 1 | 1 | 1 | 1 | 1 | 0 | Primary | mit           |
| RM15_HUMAN  | 1 | 1 | 1 | 1 | 1 | 1 | 0 | 1 | 1 | Primary |               |
| RM17_HUMAN  | 1 | 1 | 1 | 0 | 1 | 1 | 1 | 1 | 1 | Primary |               |
| RM18_HUMAN  | 1 | 1 | 1 | 1 | 1 | 1 | 1 | 1 | 0 | Primary | mit           |
| RM22_HUMAN  | 1 | 1 | 1 | 1 | 1 | 1 | 0 | 1 | 1 | Primary |               |
| RM37_HUMAN  | 1 | 1 | 1 | 1 | 1 | 1 | 1 | 1 | 0 | Primary | mit           |
| RM41_HUMAN  | 0 | 1 | 1 | 1 | 1 | 1 | 1 | 1 | 1 | Primary | mit           |
| RM43_HUMAN  | 1 | 0 | 1 | 1 | 1 | 1 | 1 | 1 | 1 | Primary | mit           |
| RM46_HUMAN  | 1 | 1 | 1 | 1 | 1 | 1 | 0 | 1 | 1 | Primary | mit           |
| RT16_HUMAN  | 1 | 1 | 1 | 1 | 1 | 1 | 1 | 1 | 0 | Primary | mit           |
| RT17_HUMAN  | 1 | 1 | 1 | 1 | 1 | 1 | 1 | 1 | 0 | Primary | mit           |
| RT25_HUMAN  | 1 | 1 | 1 | 1 | 1 | 1 | 1 | 1 | 0 | Primary | mit           |
| RT26_HUMAN  | 1 | 1 | 1 | 1 | 1 | 1 | 1 | 1 | 0 | Primary | mit           |
| RT29_HUMAN  | 1 | 1 | 1 | 1 | 1 | 1 | 1 | 1 | 0 | Primary | mit           |
| RT30_HUMAN  | 1 | 1 | 1 | 1 | 1 | 1 | 1 | 1 | 0 | Primary | mit           |
| RT31_HUMAN  | 1 | 1 | 1 | 1 | 1 | 1 | 1 | 1 | 0 | Primary | mit           |
| RT33_HUMAN  | 1 | 1 | 1 | 1 | 1 | 1 | 1 | 1 | 0 | Primary | mit           |
| RT34_HUMAN  | 1 | 1 | 1 | 1 | 1 | 1 | 1 | 1 | 0 | Primary | mit           |
| RT35_HUMAN  | 0 | 1 | 1 | 1 | 1 | 1 | 1 | 1 | 1 | Primary |               |
| RT36_HUMAN  | 1 | 1 | 1 | 1 | 1 | 1 | 1 | 1 | 0 | Primary | mit           |
| RT411_HUMAN | 1 | 1 | 1 | 1 | 1 | 1 | 0 | 1 | 1 | Primary | mit           |
| SCO1_HUMAN  | 1 | 1 | 0 | 1 | 1 | 1 | 1 | 1 | 1 | Primary | mit           |
| SCOT1_HUMAN | 1 | 1 | 1 | 1 | 1 | 1 | 1 | 1 | 0 | Primary | mit, mm       |
| SFXN1_HUMAN | 1 | 1 | 1 | 1 | 1 | 1 | 1 | 1 | 0 | Primary |               |
| SL9A6_HUMAN | 1 | 1 | 1 | 1 | 0 | 1 | 1 | 1 | 1 | Primary |               |
| SPG7_HUMAN  | 1 | 1 | 1 | 1 | 1 | 1 | 1 | 1 | 0 | Primary | mit           |
| SPYA_HUMAN  | 1 | 1 | 0 | 1 | 1 | 1 | 1 | 1 | 1 | Primary | mit, mm, per  |
| STAR_HUMAN  | 1 | 1 | 1 | 1 | 1 | 1 | 1 | 1 | 0 | Primary | mit           |
| SUCA_HUMAN  | 1 | 1 | 0 | 1 | 1 | 1 | 1 | 1 | 1 | Primary | mit           |
| SUOX_HUMAN  | 1 | 1 | 1 | 1 | 1 | 1 | 1 | 1 | 0 | Primary | mit, ims      |
| SUV3_HUMAN  | 1 | 1 | 0 | 1 | 1 | 1 | 1 | 1 | 1 | Primary | mit, mm, nuc  |
| SYFM_HUMAN  | 1 | 1 | 1 | 1 | 1 | 1 | 0 | 1 | 1 | Primary |               |
| SYIM_HUMAN  | 1 | 1 | 1 | 1 | 1 | 1 | 1 | 0 | 1 | Primary |               |
| SYLM_HUMAN  | 1 | 1 | 0 | 1 | 1 | 1 | 1 | 1 | 1 | Primary |               |
| TFAM_HUMAN  | 1 | 1 | 1 | 1 | 1 | 1 | 1 | 1 | 0 | Primary | mit           |
| THIM_HUMAN  | 1 | 1 | 1 | 1 | 1 | 1 | 1 | 1 | 0 | Primary | mit           |
| THIOM_HUMAN | 1 | 1 | 1 | 1 | 1 | 1 | 1 | 1 | 0 | Primary | mit           |
| THTR_HUMAN  | 1 | 1 | 1 | 1 | 1 | 1 | 1 | 1 | 0 | Primary | mit, mm       |
| TI17A_HUMAN | 1 | 1 | 1 | 1 | 1 | 1 | 1 | 1 | 0 | Primary | imm, mit      |
| TIM10_HUMAN | 1 | 1 | 0 | 1 | 1 | 1 | 1 | 1 | 1 | Primary | imm, mit      |
| TIM16_HUMAN | 1 | 1 | 1 | 1 | 1 | 1 | 0 | 1 | 1 | Primary |               |
| TIM9B_HUMAN | 1 | 1 | 1 | 1 | 1 | 1 | 1 | 1 | 0 | Primary | imm, mit      |
| TOM22_HUMAN | 1 | 1 | 1 | 1 | 1 | 1 | 1 | 1 | 0 | Primary |               |
| TOM40_HUMAN | 1 | 1 | 0 | 1 | 1 | 1 | 1 | 1 | 1 | Primary | omm, mit      |
| TOM7_HUMAN  | 1 | 1 | 1 | 1 | 1 | 1 | 0 | 1 | 1 | Primary | omm, mit      |
| TRAP1_HUMAN | 1 | 1 | 1 | 1 | 1 | 1 | 1 | 1 | 0 | Primary | mit           |
| TRNT1_HUMAN | 1 | 1 | 1 | 1 | 1 | 1 | 0 | 1 | 1 | Primary | mit           |
| TXTP_HUMAN  | 1 | 1 | 1 | 1 | 1 | 1 | 0 | 1 | 1 | Primary | imm, mit      |
| UCP1_HUMAN  | 1 | 1 | 1 | 1 | 1 | 1 | 1 | 1 | 0 | Primary | imm, mit      |
| UCP3_HUMAN  | 1 | 1 | 1 | 1 | 1 | 1 | 1 | 1 | 0 | Primary |               |
| UCP5_HUMAN  | 1 | 1 | 1 | 1 | 1 | 1 | 1 | 1 | 0 | Primary |               |
| VDAC2_HUMAN | 1 | 1 | 1 | 1 | 1 | 1 | 1 | 1 | 0 | Primary |               |
| VDAC3_HUMAN | 1 | 1 | 1 | 1 | 1 | 1 | 0 | 1 | 1 | Primary | omm, mit      |
| 3BHS2_HUMAN | 1 | 1 | 1 | 1 | 0 | 1 | 1 | 1 | 0 | Primary | omm, mit      |
| 68MP_HUMAN  | 1 | 1 | 1 | 1 | 0 | 1 | 1 | 1 | 0 | Primary | end, mit      |
| ABC8_HUMAN  | 1 | 1 | 1 | 1 | 1 | 1 | 0 | 1 | 0 | Primary | imm, mit      |
| ACAD9_HUMAN | 1 | 0 | 1 | 1 | 1 | 1 | 1 | 1 | 0 | Primary |               |
| ACADL_HUMAN | 1 | 1 | 0 | 1 | 1 | 1 | 1 | 1 | 0 | Primary | mit, mm       |
| ACADM_HUMAN | 1 | 1 | 1 | 1 | 1 | 1 | 0 | 1 | 0 | Primary | mit, mm       |
| ACSL1_HUMAN | 0 | 1 | 1 | 1 | 1 | 1 | 1 | 1 | 0 | Primary |               |
| ACSL4_HUMAN | 0 | 1 | 1 | 1 | 1 | 1 | 0 | 1 | 1 | Primary |               |
| ACSL5_HUMAN | 0 | 1 | 1 | 1 | 1 | 1 | 1 | 1 | 0 | Primary | end, mit      |
| ADCK3_HUMAN | 1 | 0 | 1 | 1 | 1 | 1 | 0 | 1 | 1 | Primary | mit           |
| ADRO_HUMAN  | 1 | 1 | 1 | 0 | 1 | 1 | 0 | 1 | 1 | Primary | mit, mm       |
| AIFM2_HUMAN | 1 | 0 | 1 | 1 | 1 | 1 | 0 | 1 | 1 | Primary | cyt, omm, mit |
| AMACR_HUMAN | 1 | 1 | 1 | 1 | 1 | 1 | 0 | 1 | 0 | Primary | mit, per      |
| ATP5S_HUMAN | 1 | 1 | 1 | 1 | 1 | 1 | 0 | 1 | 0 | Primary |               |
| AUHM_HUMAN  | 1 | 0 | 1 | 1 | 1 | 1 | 1 | 1 | 0 | Primary |               |
| B2CL1_HUMAN | 1 | 1 | 1 | 1 | 0 | 1 | 1 | 1 | 0 | Primary |               |
| BNI3L_HUMAN | 1 | 1 | 1 | 1 | 0 | 1 | 1 | 1 | 0 | Primary | end, nuc      |
| BNIP3_HUMAN | 1 | 1 | 1 | 1 | 0 | 1 | 1 | 1 | 0 | Primary |               |
| BPL1_HUMAN  | 1 | 1 | 1 | 1 | 0 | 1 | 1 | 1 | 0 | Primary | cyt, mit      |
| CIA30_HUMAN | 1 | 1 | 1 | 1 | 1 | 1 | 0 | 1 | 0 | Primary |               |
| COQ2_HUMAN  | 1 | 0 | 1 | 1 | 1 | 1 | 0 | 1 | 1 | Primary |               |
| COQ7_HUMAN  | 1 | 0 | 1 | 1 | 1 | 1 | 0 | 1 | 1 | Primary |               |
| COX1_HUMAN  | 1 | 1 | 0 | 1 | 1 | 1 | 1 | 0 | 1 | Primary | imm, mit      |
| COX18_HUMAN | 1 | 0 | 1 | 1 | 1 | 1 | 0 | 1 | 1 | Primary | imm, mit      |
| COX3_HUMAN  | 1 | 1 | 0 | 1 | 1 | 1 | 1 | 0 | 1 | Primary |               |
| COX42_HUMAN | 1 | 1 | 1 | 1 | 1 | 1 | 0 | 1 | 0 | Primary | imm, mit      |
| COX8A_HUMAN | 1 | 1 | 0 | 1 | 1 | 1 | 1 | 1 | 0 | Primary | imm, mit      |
| CP11A_HUMAN | 1 | 1 | 1 | 0 | 1 | 1 | 1 | 1 | 0 | Primary | mit           |
| CP24A_HUMAN | 1 | 1 | 1 | 1 | 1 | 1 | 0 | 1 | 0 | Primary | mit           |

|             |   |   |   |   |   |   |   |   |   |         |               |
|-------------|---|---|---|---|---|---|---|---|---|---------|---------------|
| CPT1A_HUMAN | 1 | 1 | 0 | 1 | 1 | 1 | 1 | 1 | 0 | Primary | omm, mit      |
| CPT1B_HUMAN | 1 | 1 | 1 | 1 | 1 | 1 | 0 | 1 | 0 | Primary | omm, mit      |
| CX6A1_HUMAN | 1 | 1 | 0 | 1 | 1 | 1 | 0 | 1 | 1 | Primary | imm, mit      |
| CX7A1_HUMAN | 1 | 1 | 0 | 1 | 1 | 1 | 1 | 1 | 0 | Primary | imm, mit      |
| CX7A2_HUMAN | 1 | 1 | 1 | 0 | 1 | 1 | 1 | 1 | 0 | Primary | imm, mit      |
| CYB_HUMAN   | 1 | 1 | 0 | 1 | 1 | 1 | 1 | 0 | 1 | Primary |               |
| DHE4_HUMAN  | 1 | 1 | 1 | 1 | 0 | 1 | 1 | 1 | 0 | Primary | mit, mm       |
| DIC_HUMAN   | 1 | 1 | 0 | 1 | 1 | 1 | 0 | 1 | 1 | Primary | imm, mit      |
| DPOG2_HUMAN | 1 | 1 | 1 | 1 | 1 | 1 | 0 | 1 | 0 | Primary | mit           |
| ECHB_HUMAN  | 1 | 1 | 0 | 1 | 1 | 1 | 1 | 1 | 0 | Primary | mit           |
| GABT_HUMAN  | 1 | 0 | 1 | 1 | 1 | 1 | 1 | 1 | 0 | Primary | mit, mm       |
| GCSH_HUMAN  | 1 | 1 | 0 | 1 | 0 | 1 | 1 | 1 | 1 | Primary | mit           |
| GCSP_HUMAN  | 1 | 1 | 0 | 0 | 1 | 1 | 1 | 1 | 1 | Primary | mit           |
| GDC_HUMAN   | 1 | 0 | 1 | 1 | 1 | 1 | 0 | 1 | 1 | Primary | imm, mit      |
| GHC1_HUMAN  | 1 | 1 | 1 | 1 | 1 | 1 | 0 | 1 | 0 | Primary |               |
| GHC2_HUMAN  | 1 | 1 | 1 | 1 | 1 | 1 | 0 | 1 | 0 | Primary |               |
| GLRX2_HUMAN | 1 | 1 | 1 | 1 | 1 | 1 | 0 | 0 | 1 | Primary | nuc           |
| GLSK_HUMAN  | 1 | 1 | 0 | 1 | 1 | 1 | 1 | 1 | 0 | Primary |               |
| GLSL_HUMAN  | 1 | 1 | 1 | 1 | 1 | 1 | 0 | 1 | 0 | Primary | mit           |
| GLYM_HUMAN  | 1 | 1 | 0 | 1 | 1 | 1 | 1 | 1 | 0 | Primary | mit           |
| GSTK1_HUMAN | 1 | 1 | 1 | 1 | 1 | 1 | 1 | 0 | 0 | Primary | per           |
| GTPB3_HUMAN | 1 | 1 | 0 | 1 | 1 | 1 | 0 | 1 | 1 | Primary | mit           |
| HSC20_HUMAN | 1 | 0 | 1 | 1 | 1 | 1 | 0 | 1 | 1 | Primary |               |
| HXK1_HUMAN  | 1 | 1 | 0 | 1 | 1 | 1 | 1 | 1 | 0 | Primary | omm, mit      |
| IDH3B_HUMAN | 1 | 1 | 1 | 1 | 1 | 1 | 0 | 1 | 0 | Primary | mit           |
| IMP2L_HUMAN | 1 | 1 | 0 | 1 | 1 | 1 | 0 | 1 | 1 | Primary |               |
| ISCU_HUMAN  | 1 | 1 | 1 | 1 | 1 | 1 | 0 | 0 | 1 | Primary | cyt, nuc      |
| KAD4_HUMAN  | 1 | 1 | 1 | 1 | 0 | 1 | 1 | 1 | 0 | Primary | mit, mm       |
| KCRS_HUMAN  | 1 | 1 | 0 | 1 | 1 | 1 | 1 | 1 | 0 | Primary | imm, mit      |
| LIAS_HUMAN  | 1 | 0 | 1 | 1 | 1 | 1 | 0 | 1 | 1 | Primary |               |
| MCATL_HUMAN | 1 | 0 | 1 | 1 | 1 | 1 | 0 | 1 | 1 | Primary |               |
| MECR_HUMAN  | 1 | 0 | 1 | 1 | 1 | 1 | 1 | 0 | 1 | Primary | mit           |
| MFN1_HUMAN  | 1 | 1 | 1 | 1 | 1 | 1 | 0 | 1 | 0 | Primary | cyt           |
| MFRN2_HUMAN | 1 | 1 | 0 | 1 | 1 | 1 | 1 | 1 | 0 | Primary | imm, mit      |
| MFTC_HUMAN  | 1 | 1 | 0 | 1 | 1 | 1 | 0 | 1 | 1 | Primary | imm, mit      |
| MTCH1_HUMAN | 1 | 1 | 1 | 1 | 1 | 1 | 0 | 1 | 0 | Primary |               |
| MTCH2_HUMAN | 1 | 1 | 0 | 1 | 1 | 1 | 1 | 1 | 0 | Primary |               |
| MTP18_HUMAN | 1 | 0 | 1 | 1 | 1 | 1 | 1 | 1 | 0 | Primary | mit           |
| MTU1_HUMAN  | 1 | 0 | 1 | 1 | 1 | 1 | 0 | 1 | 1 | Primary | mit           |
| MUTA_HUMAN  | 1 | 1 | 0 | 1 | 1 | 1 | 1 | 1 | 0 | Primary | mit, mm       |
| NDUA3_HUMAN | 1 | 1 | 0 | 1 | 1 | 1 | 1 | 1 | 0 | Primary | imm, mit      |
| NDUAB_HUMAN | 1 | 0 | 1 | 1 | 1 | 1 | 1 | 1 | 0 | Primary |               |
| NDUAD_HUMAN | 1 | 1 | 0 | 1 | 1 | 1 | 1 | 1 | 0 | Primary | imm, mit, nuc |
| NDUB1_HUMAN | 1 | 1 | 1 | 1 | 0 | 1 | 1 | 1 | 0 | Primary | imm, mit      |
| NDUB2_HUMAN | 1 | 1 | 0 | 1 | 1 | 1 | 1 | 1 | 0 | Primary | imm, mit      |
| NDUB3_HUMAN | 1 | 1 | 0 | 1 | 1 | 1 | 1 | 1 | 0 | Primary | imm, mit      |
| NDUB4_HUMAN | 1 | 1 | 0 | 1 | 1 | 1 | 1 | 1 | 0 | Primary | imm, mit      |
| NDUB6_HUMAN | 1 | 1 | 0 | 1 | 1 | 1 | 1 | 1 | 0 | Primary | imm, mit      |
| NDUB8_HUMAN | 1 | 1 | 0 | 1 | 1 | 1 | 1 | 1 | 0 | Primary | imm, mit      |
| NDUB9_HUMAN | 1 | 1 | 0 | 1 | 1 | 1 | 1 | 1 | 0 | Primary | imm, mit      |
| NDUC1_HUMAN | 1 | 1 | 0 | 1 | 1 | 1 | 1 | 1 | 0 | Primary | imm, mit      |
| NDUC2_HUMAN | 1 | 1 | 0 | 1 | 1 | 1 | 1 | 1 | 0 | Primary | imm, mit      |
| NDUS1_HUMAN | 1 | 1 | 0 | 1 | 1 | 1 | 1 | 1 | 0 | Primary | imm, mit      |
| NDUS2_HUMAN | 1 | 1 | 0 | 1 | 1 | 1 | 1 | 1 | 0 | Primary | imm, mit      |
| NDUS3_HUMAN | 1 | 1 | 0 | 1 | 1 | 1 | 1 | 1 | 0 | Primary | imm, mit      |
| NEUL_HUMAN  | 1 | 1 | 1 | 1 | 1 | 1 | 0 | 1 | 0 | Primary |               |
| ORN_HUMAN   | 1 | 1 | 0 | 1 | 1 | 1 | 1 | 0 | 1 | Primary | nuc           |
| P5CS_HUMAN  | 1 | 1 | 1 | 1 | 1 | 1 | 0 | 1 | 0 | Primary | imm, mit      |
| PCCB_HUMAN  | 1 | 1 | 0 | 1 | 1 | 1 | 1 | 1 | 0 | Primary | mit, mm       |
| PDK2_HUMAN  | 1 | 1 | 0 | 1 | 1 | 1 | 1 | 1 | 0 | Primary | mit, mm       |
| PEMT_HUMAN  | 1 | 1 | 1 | 1 | 0 | 1 | 1 | 1 | 0 | Primary |               |
| PEO1_HUMAN  | 1 | 1 | 1 | 1 | 1 | 1 | 0 | 1 | 0 | Primary | mit, mm       |
| PHB_HUMAN   | 1 | 0 | 1 | 1 | 1 | 1 | 1 | 0 | 1 | Primary |               |
| PRDX3_HUMAN | 1 | 1 | 0 | 1 | 1 | 1 | 1 | 1 | 0 | Primary | mit           |
| PROD_HUMAN  | 1 | 1 | 0 | 1 | 1 | 1 | 0 | 1 | 1 | Primary | mit, mm       |
| PTH2_HUMAN  | 1 | 0 | 1 | 1 | 1 | 1 | 0 | 1 | 1 | Primary | mit           |
| PYRD_HUMAN  | 1 | 1 | 1 | 1 | 1 | 1 | 0 | 1 | 0 | Primary |               |
| QCR8_HUMAN  | 1 | 1 | 0 | 1 | 1 | 1 | 1 | 1 | 0 | Primary | imm, mit      |
| RF1M_HUMAN  | 1 | 0 | 1 | 1 | 1 | 1 | 1 | 1 | 0 | Primary | mit           |
| RM19_HUMAN  | 1 | 1 | 0 | 1 | 1 | 1 | 1 | 1 | 0 | Primary | mit           |
| RM28_HUMAN  | 1 | 0 | 1 | 0 | 1 | 1 | 1 | 1 | 1 | Primary | mit           |
| RM33_HUMAN  | 1 | 1 | 0 | 1 | 1 | 1 | 0 | 1 | 1 | Primary | mit           |
| RM39_HUMAN  | 1 | 1 | 1 | 1 | 1 | 1 | 0 | 1 | 0 | Primary | mit           |
| RM42_HUMAN  | 1 | 1 | 1 | 1 | 1 | 1 | 0 | 1 | 0 | Primary | mit           |
| RM45_HUMAN  | 1 | 1 | 1 | 1 | 1 | 1 | 0 | 1 | 0 | Primary | mit           |
| RM51_HUMAN  | 0 | 1 | 1 | 1 | 1 | 1 | 1 | 1 | 0 | Primary |               |
| RRF2M_HUMAN | 1 | 0 | 1 | 1 | 1 | 1 | 0 | 1 | 1 | Primary |               |
| RT06_HUMAN  | 1 | 1 | 1 | 0 | 1 | 1 | 1 | 1 | 0 | Primary | mit           |
| RT10_HUMAN  | 1 | 1 | 0 | 1 | 1 | 1 | 1 | 1 | 0 | Primary | mit           |
| RT18A_HUMAN | 1 | 1 | 0 | 1 | 1 | 1 | 1 | 1 | 0 | Primary | mit           |
| RT18B_HUMAN | 1 | 1 | 0 | 1 | 1 | 1 | 1 | 1 | 0 | Primary | mit           |
| RT22_HUMAN  | 1 | 1 | 0 | 1 | 1 | 1 | 1 | 1 | 0 | Primary | mit           |
| RT24_HUMAN  | 0 | 1 | 1 | 1 | 1 | 1 | 1 | 1 | 0 | Primary |               |
| RT28_HUMAN  | 1 | 1 | 0 | 1 | 1 | 1 | 1 | 1 | 0 | Primary | mit           |
| RT63_HUMAN  | 0 | 1 | 1 | 1 | 1 | 1 | 1 | 1 | 0 | Primary |               |
| S2535_HUMAN | 1 | 0 | 1 | 1 | 1 | 1 | 0 | 1 | 1 | Primary |               |
| S2536_HUMAN | 1 | 1 | 0 | 1 | 1 | 1 | 1 | 0 | 1 | Primary |               |

|             |   |   |   |   |   |   |   |   |   |         |               |
|-------------|---|---|---|---|---|---|---|---|---|---------|---------------|
| S2538_HUMAN | 1 | 1 | 1 | 1 | 0 | 1 | 0 | 1 | 1 | Primary |               |
| S2540_HUMAN | 1 | 1 | 1 | 1 | 1 | 1 | 0 | 1 | 0 | Primary |               |
| SAM50_HUMAN | 1 | 0 | 0 | 1 | 1 | 1 | 1 | 1 | 1 | Primary |               |
| SCMC1_HUMAN | 1 | 0 | 0 | 1 | 1 | 1 | 1 | 1 | 1 | Primary | imm, mit      |
| SCO2_HUMAN  | 1 | 1 | 1 | 1 | 0 | 1 | 1 | 1 | 0 | Primary | mit           |
| SFXN3_HUMAN | 1 | 1 | 1 | 1 | 1 | 1 | 0 | 1 | 0 | Primary | mit           |
| SPEB_HUMAN  | 1 | 1 | 1 | 1 | 1 | 1 | 0 | 1 | 0 | Primary | mit           |
| SSDH_HUMAN  | 1 | 1 | 1 | 1 | 1 | 1 | 0 | 1 | 0 | Primary | mit           |
| SUCB1_HUMAN | 1 | 1 | 0 | 1 | 1 | 1 | 0 | 1 | 1 | Primary | mit           |
| SUCB2_HUMAN | 1 | 1 | 0 | 1 | 1 | 1 | 1 | 1 | 0 | Primary | mit           |
| SYJ2B_HUMAN | 1 | 1 | 1 | 1 | 0 | 1 | 1 | 1 | 0 | Primary |               |
| SYSM_HUMAN  | 1 | 1 | 0 | 1 | 1 | 1 | 0 | 1 | 1 | Primary |               |
| SYYM_HUMAN  | 1 | 0 | 1 | 1 | 1 | 1 | 0 | 1 | 1 | Primary | mit, mm       |
| THIL_HUMAN  | 1 | 1 | 0 | 1 | 1 | 1 | 1 | 1 | 0 | Primary | mit           |
| TIM50_HUMAN | 1 | 0 | 1 | 1 | 1 | 1 | 0 | 1 | 1 | Primary | nuc           |
| TIM8B_HUMAN | 1 | 1 | 0 | 1 | 1 | 1 | 1 | 1 | 0 | Primary |               |
| TMLH_HUMAN  | 1 | 1 | 1 | 1 | 0 | 1 | 0 | 1 | 1 | Primary |               |
| TOM34_HUMAN | 0 | 1 | 1 | 1 | 1 | 1 | 1 | 1 | 0 | Primary | cyt, omm, mit |
| TPC_HUMAN   | 1 | 1 | 0 | 1 | 1 | 1 | 0 | 1 | 1 | Primary | imm, mit      |
| TRXR2_HUMAN | 1 | 1 | 0 | 1 | 1 | 1 | 1 | 1 | 0 | Primary | mit           |
| UCP4_HUMAN  | 1 | 1 | 0 | 1 | 1 | 1 | 1 | 1 | 0 | Primary | imm, mit      |
| UK114_HUMAN | 1 | 0 | 1 | 1 | 1 | 1 | 1 | 0 | 1 | Primary | cyt, nuc      |
| UQCC_HUMAN  | 1 | 0 | 1 | 1 | 1 | 1 | 1 | 0 | 1 | Primary |               |
| YMEL1_HUMAN | 1 | 0 | 1 | 1 | 1 | 1 | 0 | 1 | 1 | Primary | mit           |
| AASS_HUMAN  | 1 | 0 | 1 | 1 | 1 | 1 | 0 | 1 | 0 | Primary |               |
| ABHDB_HUMAN | 0 | 0 | 1 | 1 | 1 | 1 | 1 | 0 | 1 | Primary |               |
| ACAD8_HUMAN | 1 | 0 | 1 | 1 | 1 | 1 | 0 | 1 | 0 | Primary | mit           |
| ACOT2_HUMAN | 1 | 0 | 1 | 1 | 1 | 1 | 1 | 0 | 0 | Primary | mit           |
| ACOT9_HUMAN | 1 | 0 | 1 | 1 | 1 | 1 | 1 | 0 | 0 | Primary |               |
| ACS2L_HUMAN | 1 | 0 | 1 | 0 | 1 | 1 | 1 | 1 | 0 | Primary | mit, mm       |
| AGT2_HUMAN  | 1 | 1 | 0 | 1 | 1 | 1 | 0 | 1 | 0 | Primary |               |
| ALR_HUMAN   | 0 | 0 | 1 | 1 | 1 | 1 | 1 | 0 | 1 | Primary |               |
| ASAH2_HUMAN | 0 | 1 | 1 | 1 | 1 | 1 | 0 | 1 | 0 | Primary | mem, ext      |
| ATP6_HUMAN  | 1 | 1 | 0 | 1 | 0 | 1 | 1 | 0 | 1 | Primary | imm, mit      |
| ATPF1_HUMAN | 1 | 0 | 1 | 1 | 1 | 0 | 0 | 1 | 1 | Primary |               |
| ATPF2_HUMAN | 1 | 0 | 1 | 0 | 1 | 1 | 0 | 1 | 1 | Primary |               |
| BDH_HUMAN   | 1 | 0 | 0 | 1 | 1 | 1 | 1 | 1 | 0 | Primary | mit, mm       |
| BR44_HUMAN  | 0 | 0 | 1 | 1 | 1 | 1 | 1 | 0 | 1 | Primary |               |
| CASQ1_HUMAN | 0 | 1 | 1 | 1 | 0 | 1 | 1 | 1 | 0 | Primary | mit           |
| CDS2_HUMAN  | 1 | 1 | 1 | 1 | 0 | 1 | 0 | 1 | 0 | Primary |               |
| CN159_HUMAN | 1 | 0 | 1 | 0 | 1 | 1 | 1 | 1 | 0 | Primary |               |
| COQ4_HUMAN  | 1 | 0 | 1 | 1 | 1 | 1 | 0 | 0 | 1 | Primary | imm, mit      |
| COQ6_HUMAN  | 1 | 0 | 1 | 1 | 1 | 1 | 0 | 0 | 1 | Primary |               |
| COQ9_HUMAN  | 1 | 0 | 0 | 1 | 1 | 1 | 1 | 0 | 1 | Primary |               |
| COX2_HUMAN  | 1 | 1 | 0 | 1 | 0 | 1 | 1 | 0 | 1 | Primary | imm, mit      |
| COX8C_HUMAN | 1 | 0 | 1 | 1 | 1 | 1 | 1 | 1 | 0 | Primary | imm, mit      |
| CPSM_HUMAN  | 1 | 1 | 0 | 1 | 1 | 1 | 0 | 1 | 0 | Primary | mit           |
| CX6A2_HUMAN | 1 | 0 | 1 | 1 | 1 | 1 | 1 | 0 | 0 | Primary | imm, mit      |
| DDX28_HUMAN | 1 | 1 | 1 | 1 | 1 | 1 | 0 | 0 | 0 | Primary | mit, nuc      |
| DHSD_HUMAN  | 1 | 1 | 0 | 0 | 1 | 1 | 1 | 1 | 0 | Primary | imm, mit      |
| DPS1_HUMAN  | 1 | 0 | 1 | 1 | 1 | 1 | 0 | 0 | 1 | Primary |               |
| DUT_HUMAN   | 1 | 0 | 1 | 0 | 1 | 1 | 1 | 1 | 0 | Primary | nuc           |
| ECH1_HUMAN  | 1 | 0 | 1 | 1 | 1 | 1 | 1 | 0 | 0 | Primary |               |
| FABD_HUMAN  | 1 | 0 | 1 | 1 | 1 | 1 | 0 | 1 | 0 | Primary | mit           |
| FIS1_HUMAN  | 1 | 0 | 1 | 1 | 0 | 1 | 1 | 0 | 1 | Primary | omm, mit, per |
| GLO2_HUMAN  | 0 | 0 | 1 | 1 | 1 | 1 | 1 | 0 | 1 | Primary | cyt           |
| GLRX5_HUMAN | 1 | 0 | 1 | 1 | 1 | 1 | 0 | 0 | 1 | Primary |               |
| GPX4_HUMAN  | 1 | 1 | 0 | 1 | 1 | 1 | 0 | 1 | 0 | Primary | cyt, mit      |
| GRPE2_HUMAN | 1 | 0 | 1 | 1 | 1 | 1 | 0 | 1 | 0 | Primary |               |
| GTPB5_HUMAN | 1 | 0 | 1 | 1 | 1 | 1 | 0 | 0 | 1 | Primary | mit           |
| HCDH_HUMAN  | 1 | 1 | 0 | 1 | 1 | 1 | 1 | 1 | 0 | Primary | mit, mm       |
| HDMCP_HUMAN | 1 | 0 | 1 | 1 | 1 | 1 | 0 | 1 | 0 | Primary | imm, mit      |
| HIBCH_HUMAN | 1 | 0 | 0 | 1 | 1 | 1 | 1 | 0 | 1 | Primary |               |
| HINT2_HUMAN | 1 | 0 | 1 | 1 | 1 | 1 | 1 | 0 | 0 | Primary | mit           |
| IF3M_HUMAN  | 0 | 1 | 1 | 1 | 1 | 1 | 0 | 1 | 0 | Primary |               |
| IMP1L_HUMAN | 1 | 1 | 0 | 1 | 0 | 1 | 1 | 0 | 1 | Primary |               |
| ISCA1_HUMAN | 1 | 0 | 1 | 1 | 1 | 1 | 0 | 0 | 1 | Primary | mit           |
| L2HDH_HUMAN | 1 | 0 | 1 | 1 | 1 | 1 | 1 | 0 | 0 | Primary | mit           |
| LDHD_HUMAN  | 1 | 0 | 1 | 1 | 1 | 1 | 0 | 0 | 1 | Primary |               |
| MCEE_HUMAN  | 1 | 0 | 0 | 1 | 1 | 1 | 1 | 1 | 0 | Primary |               |
| MCSP_HUMAN  | 1 | 1 | 0 | 1 | 0 | 1 | 1 | 1 | 0 | Primary |               |
| MGST1_HUMAN | 0 | 1 | 1 | 1 | 0 | 1 | 1 | 1 | 0 | Primary |               |
| NAGS_HUMAN  | 1 | 0 | 1 | 1 | 1 | 1 | 0 | 0 | 1 | Primary | mit, mm       |
| NDUAC_HUMAN | 1 | 1 | 0 | 1 | 1 | 0 | 1 | 1 | 0 | Primary | imm, mit      |
| NDUV1_HUMAN | 1 | 1 | 0 | 1 | 1 | 1 | 0 | 1 | 0 | Primary | imm, mit      |
| NFU1_HUMAN  | 0 | 0 | 1 | 1 | 1 | 1 | 1 | 0 | 1 | Primary | cyt, mit      |
| NIPS2_HUMAN | 1 | 0 | 1 | 1 | 1 | 1 | 1 | 0 | 0 | Primary |               |
| NTHL1_HUMAN | 1 | 0 | 1 | 1 | 1 | 1 | 0 | 0 | 1 | Primary | nuc           |
| NU5M_HUMAN  | 1 | 1 | 0 | 1 | 1 | 1 | 1 | 0 | 0 | Primary |               |
| OPA1_HUMAN  | 1 | 1 | 0 | 0 | 1 | 1 | 1 | 1 | 0 | Primary | imm, mit, ims |
| OXSM_HUMAN  | 1 | 0 | 1 | 1 | 1 | 1 | 0 | 0 | 1 | Primary | mit           |
| PANK2_HUMAN | 1 | 1 | 0 | 1 | 1 | 1 | 0 | 1 | 0 | Primary | cyt, mit      |
| PARL_HUMAN  | 1 | 0 | 1 | 1 | 1 | 1 | 0 | 0 | 1 | Primary | nuc           |
| PISD_HUMAN  | 1 | 0 | 1 | 0 | 1 | 1 | 0 | 1 | 1 | Primary |               |
| PREP_HUMAN  | 1 | 0 | 0 | 1 | 1 | 0 | 1 | 1 | 1 | Primary | mit, mm       |
| RM14_HUMAN  | 0 | 1 | 1 | 1 | 1 | 1 | 0 | 1 | 0 | Primary | mit           |
| RM20_HUMAN  | 0 | 1 | 0 | 1 | 1 | 1 | 1 | 1 | 0 | Primary | mit           |

|             |   |   |   |   |   |   |   |   |   |         |               |
|-------------|---|---|---|---|---|---|---|---|---|---------|---------------|
| RM24_HUMAN  | 0 | 1 | 1 | 1 | 1 | 1 | 0 | 1 | 0 | Primary |               |
| RM30_HUMAN  | 0 | 1 | 1 | 1 | 1 | 1 | 0 | 1 | 0 | Primary |               |
| RM35_HUMAN  | 1 | 1 | 1 | 1 | 1 | 1 | 0 | 0 | 0 | Primary | mit           |
| RM40_HUMAN  | 1 | 0 | 1 | 1 | 1 | 1 | 0 | 1 | 0 | Primary |               |
| RM50_HUMAN  | 0 | 1 | 1 | 1 | 1 | 1 | 0 | 1 | 0 | Primary |               |
| RRFM_HUMAN  | 1 | 0 | 1 | 1 | 1 | 1 | 0 | 1 | 0 | Primary |               |
| RT07_HUMAN  | 0 | 1 | 0 | 1 | 1 | 1 | 1 | 1 | 0 | Primary |               |
| S2533_HUMAN | 1 | 1 | 0 | 1 | 1 | 1 | 0 | 1 | 0 | Primary | imm, mit      |
| S2539_HUMAN | 1 | 1 | 0 | 0 | 0 | 1 | 1 | 1 | 1 | Primary | imm, mit      |
| S2543_HUMAN | 1 | 0 | 0 | 1 | 1 | 1 | 0 | 1 | 1 | Primary |               |
| S2546_HUMAN | 1 | 0 | 1 | 1 | 1 | 1 | 0 | 1 | 0 | Primary |               |
| SAMC_HUMAN  | 1 | 0 | 0 | 1 | 1 | 1 | 0 | 1 | 1 | Primary | imm, mit      |
| SCMC2_HUMAN | 1 | 0 | 1 | 1 | 1 | 1 | 0 | 1 | 0 | Primary | imm, mit      |
| SCMC3_HUMAN | 1 | 0 | 1 | 1 | 1 | 1 | 0 | 1 | 0 | Primary | imm, mit      |
| SCOT2_HUMAN | 1 | 0 | 1 | 1 | 0 | 1 | 1 | 1 | 0 | Primary | mit           |
| SEPT4_HUMAN | 0 | 1 | 1 | 1 | 1 | 1 | 0 | 1 | 0 | Primary | mit, nuc      |
| SFXN2_HUMAN | 1 | 1 | 0 | 1 | 1 | 1 | 0 | 1 | 0 | Primary |               |
| SFXN5_HUMAN | 1 | 0 | 0 | 1 | 1 | 1 | 0 | 1 | 1 | Primary |               |
| STAR3_HUMAN | 1 | 1 | 0 | 1 | 0 | 1 | 1 | 1 | 0 | Primary |               |
| SYK_HUMAN   | 0 | 1 | 0 | 1 | 1 | 1 | 0 | 1 | 1 | Primary | mit           |
| SYMM_HUMAN  | 1 | 0 | 0 | 1 | 1 | 1 | 0 | 1 | 1 | Primary |               |
| TACO1_HUMAN | 1 | 0 | 0 | 1 | 1 | 1 | 1 | 0 | 1 | Primary | mit           |
| TOP1M_HUMAN | 1 | 1 | 0 | 1 | 1 | 1 | 0 | 1 | 0 | Primary | mit           |
| VAMP1_HUMAN | 1 | 1 | 1 | 0 | 1 | 0 | 1 | 1 | 0 | Primary | omm, mit      |
| 3BP5_HUMAN  | 1 | 0 | 1 | 1 | 0 | 1 | 0 | 1 | 0 | Primary | mit           |
| AADAT_HUMAN | 1 | 0 | 1 | 0 | 1 | 1 | 0 | 1 | 0 | Primary |               |
| AATC_HUMAN  | 0 | 1 | 0 | 1 | 0 | 1 | 1 | 0 | 1 | Primary | cyt           |
| ACN9_HUMAN  | 1 | 0 | 0 | 1 | 1 | 1 | 0 | 0 | 1 | Primary |               |
| ACS2B_HUMAN | 1 | 0 | 1 | 1 | 0 | 1 | 0 | 1 | 0 | Primary | mit, mm       |
| ACSL3_HUMAN | 0 | 1 | 1 | 1 | 0 | 1 | 0 | 1 | 0 | Primary |               |
| ACSM1_HUMAN | 1 | 0 | 1 | 1 | 1 | 1 | 0 | 0 | 0 | Primary |               |
| ADCK2_HUMAN | 1 | 0 | 0 | 1 | 1 | 1 | 0 | 0 | 1 | Primary |               |
| ADXL_HUMAN  | 1 | 0 | 0 | 1 | 1 | 1 | 0 | 0 | 1 | Primary |               |
| ALAT2_HUMAN | 0 | 0 | 1 | 1 | 1 | 1 | 0 | 0 | 1 | Primary |               |
| AT2L2_HUMAN | 1 | 0 | 1 | 1 | 1 | 1 | 0 | 0 | 0 | Primary |               |
| ATP7B_HUMAN | 0 | 1 | 1 | 1 | 0 | 0 | 0 | 1 | 1 | Primary | mit           |
| ATP8_HUMAN  | 1 | 1 | 0 | 1 | 0 | 1 | 1 | 0 | 0 | Primary | mit           |
| BAX_HUMAN   | 0 | 0 | 1 | 1 | 1 | 1 | 1 | 0 | 0 | Primary |               |
| C1TC_HUMAN  | 0 | 0 | 0 | 1 | 1 | 1 | 1 | 0 | 1 | Primary | cyt           |
| C1TM_HUMAN  | 0 | 0 | 1 | 1 | 1 | 1 | 0 | 1 | 0 | Primary | mit           |
| CA031_HUMAN | 1 | 0 | 1 | 1 | 1 | 1 | 0 | 0 | 0 | Primary |               |
| CECR5_HUMAN | 1 | 0 | 0 | 1 | 1 | 0 | 1 | 0 | 1 | Primary |               |
| CF057_HUMAN | 1 | 0 | 0 | 1 | 1 | 1 | 0 | 0 | 1 | Primary |               |
| CG055_HUMAN | 0 | 0 | 1 | 1 | 1 | 1 | 1 | 0 | 0 | Primary |               |
| CHCH3_HUMAN | 0 | 0 | 0 | 1 | 1 | 1 | 1 | 0 | 1 | Primary |               |
| CHDH_HUMAN  | 1 | 0 | 0 | 1 | 1 | 1 | 0 | 1 | 0 | Primary |               |
| COQ5_HUMAN  | 1 | 0 | 0 | 1 | 1 | 1 | 0 | 0 | 1 | Primary |               |
| COX16_HUMAN | 1 | 0 | 1 | 0 | 1 | 1 | 0 | 0 | 1 | Primary |               |
| COX7S_HUMAN | 1 | 1 | 0 | 1 | 0 | 1 | 0 | 1 | 0 | Primary |               |
| CPT1C_HUMAN | 1 | 0 | 1 | 0 | 1 | 1 | 0 | 1 | 0 | Primary |               |
| CQ10A_HUMAN | 1 | 0 | 0 | 1 | 1 | 1 | 0 | 0 | 1 | Primary |               |
| CRLS1_HUMAN | 1 | 0 | 0 | 1 | 1 | 1 | 0 | 0 | 1 | Primary | imm, mit      |
| CX7B2_HUMAN | 1 | 0 | 1 | 1 | 0 | 1 | 0 | 1 | 0 | Primary |               |
| DEFM_HUMAN  | 0 | 1 | 0 | 1 | 0 | 1 | 1 | 1 | 0 | Primary |               |
| DHB4_HUMAN  | 0 | 0 | 1 | 1 | 1 | 1 | 0 | 0 | 1 | Primary | per           |
| ECHD3_HUMAN | 1 | 0 | 0 | 1 | 1 | 1 | 1 | 0 | 0 | Primary |               |
| ECSIT_HUMAN | 0 | 0 | 1 | 1 | 1 | 1 | 1 | 0 | 0 | Primary | cyt, mit, nuc |
| EFTS_HUMAN  | 1 | 1 | 0 | 1 | 0 | 1 | 0 | 1 | 0 | Primary | mit           |
| FAHD1_HUMAN | 0 | 0 | 1 | 1 | 1 | 1 | 0 | 0 | 1 | Primary |               |
| FIBP_HUMAN  | 0 | 1 | 1 | 1 | 0 | 1 | 0 | 1 | 0 | Primary | cyt, nuc      |
| FTMT_HUMAN  | 1 | 0 | 0 | 1 | 1 | 1 | 0 | 1 | 0 | Primary | mit           |
| FXRD1_HUMAN | 1 | 0 | 1 | 1 | 1 | 1 | 0 | 0 | 0 | Primary |               |
| GLPK3_HUMAN | 0 | 1 | 0 | 1 | 0 | 1 | 1 | 1 | 0 | Primary |               |
| GLYAT_HUMAN | 0 | 0 | 1 | 1 | 1 | 1 | 1 | 0 | 0 | Primary |               |
| GLYC_HUMAN  | 0 | 1 | 0 | 1 | 1 | 1 | 0 | 0 | 1 | Primary | cyt           |
| GUF1_HUMAN  | 1 | 0 | 0 | 1 | 1 | 1 | 0 | 0 | 1 | Primary |               |
| HAX1_HUMAN  | 0 | 1 | 1 | 1 | 0 | 1 | 0 | 1 | 0 | Primary | end, mit      |
| HCLS1_HUMAN | 0 | 1 | 0 | 1 | 0 | 1 | 1 | 1 | 0 | Primary |               |
| KMCP1_HUMAN | 1 | 0 | 1 | 1 | 1 | 1 | 0 | 0 | 0 | Primary |               |
| LACE1_HUMAN | 1 | 0 | 0 | 1 | 1 | 1 | 0 | 0 | 1 | Primary |               |
| LACTB_HUMAN | 1 | 1 | 1 | 0 | 1 | 0 | 1 | 0 | 0 | Primary | mit           |
| LONP2_HUMAN | 1 | 1 | 0 | 1 | 0 | 1 | 0 | 1 | 0 | Primary | per           |
| LYRM4_HUMAN | 1 | 0 | 0 | 1 | 1 | 1 | 0 | 0 | 1 | Primary | mit           |
| MAOX_HUMAN  | 0 | 0 | 0 | 1 | 1 | 1 | 1 | 0 | 1 | Primary | cyt           |
| MCAR1_HUMAN | 1 | 0 | 0 | 1 | 1 | 1 | 0 | 1 | 0 | Primary |               |
| MIA40_HUMAN | 1 | 0 | 0 | 1 | 1 | 1 | 0 | 0 | 1 | Primary | mit, ims      |
| MOD5_HUMAN  | 1 | 0 | 0 | 0 | 1 | 1 | 0 | 1 | 1 | Primary |               |
| MRM1_HUMAN  | 1 | 0 | 0 | 1 | 1 | 1 | 0 | 0 | 1 | Primary |               |
| MTHFS_HUMAN | 0 | 0 | 1 | 1 | 1 | 1 | 0 | 0 | 1 | Primary | cyt           |
| MTO1_HUMAN  | 1 | 0 | 0 | 1 | 1 | 1 | 0 | 0 | 1 | Primary |               |
| MUTYH_HUMAN | 1 | 1 | 0 | 1 | 1 | 0 | 1 | 0 | 0 | Primary | nuc           |
| MYCBP_HUMAN | 0 | 1 | 1 | 1 | 0 | 1 | 0 | 1 | 0 | Primary | cyt, mit, nuc |
| NB5R3_HUMAN | 0 | 0 | 1 | 1 | 0 | 1 | 1 | 1 | 0 | Primary | cyt           |
| NDUF3_HUMAN | 0 | 0 | 1 | 1 | 1 | 1 | 1 | 0 | 0 | Primary |               |
| NU1M_HUMAN  | 1 | 1 | 0 | 1 | 0 | 1 | 1 | 0 | 0 | Primary |               |
| NU2M_HUMAN  | 1 | 1 | 0 | 1 | 0 | 1 | 1 | 0 | 0 | Primary | imm, mit      |
| NU4LM_HUMAN | 1 | 1 | 0 | 1 | 0 | 1 | 1 | 0 | 0 | Primary |               |



|             |   |   |   |   |   |   |   |   |   |         |               |
|-------------|---|---|---|---|---|---|---|---|---|---------|---------------|
| NU4M_HUMAN  | 1 | 1 | 0 | 1 | 0 | 1 | 1 | 0 | 0 | Primary |               |
| NU6M_HUMAN  | 1 | 1 | 0 | 1 | 0 | 1 | 1 | 0 | 0 | Primary |               |
| NUDT9_HUMAN | 1 | 0 | 1 | 1 | 0 | 1 | 0 | 1 | 0 | Primary | mit           |
| OPA3_HUMAN  | 0 | 1 | 1 | 0 | 1 | 0 | 1 | 1 | 0 | Primary |               |
| P5CR1_HUMAN | 0 | 0 | 1 | 1 | 1 | 1 | 1 | 0 | 0 | Primary | mit           |
| PDIP2_HUMAN | 1 | 0 | 1 | 1 | 1 | 1 | 0 | 0 | 0 | Primary |               |
| PDP1_HUMAN  | 1 | 0 | 1 | 0 | 1 | 1 | 1 | 0 | 0 | Primary |               |
| PDPR_HUMAN  | 1 | 0 | 1 | 1 | 1 | 0 | 1 | 0 | 0 | Primary |               |
| PGES2_HUMAN | 0 | 0 | 1 | 1 | 1 | 1 | 1 | 0 | 0 | Primary | gol, cyt, nuc |
| PGPS1_HUMAN | 1 | 0 | 0 | 1 | 1 | 1 | 0 | 0 | 1 | Primary |               |
| PHB2_HUMAN  | 1 | 0 | 0 | 0 | 1 | 1 | 1 | 0 | 1 | Primary |               |
| PINK1_HUMAN | 1 | 0 | 0 | 1 | 1 | 1 | 0 | 1 | 0 | Primary | omm, mit      |
| PM34_HUMAN  | 1 | 1 | 0 | 1 | 0 | 1 | 1 | 0 | 0 | Primary | per           |
| PNPT1_HUMAN | 1 | 0 | 0 | 1 | 1 | 1 | 1 | 0 | 0 | Primary | mit           |
| PPA6_HUMAN  | 1 | 1 | 0 | 1 | 1 | 1 | 0 | 0 | 0 | Primary |               |
| PPTC7_HUMAN | 1 | 0 | 0 | 1 | 1 | 1 | 0 | 0 | 1 | Primary |               |
| QRSL1_HUMAN | 1 | 0 | 0 | 1 | 1 | 1 | 0 | 0 | 1 | Primary |               |
| RAB32_HUMAN | 1 | 0 | 0 | 1 | 1 | 1 | 0 | 1 | 0 | Primary | mit           |
| RFIP5_HUMAN | 1 | 0 | 1 | 0 | 1 | 1 | 0 | 1 | 0 | Primary | cyt, mit      |
| RM10_HUMAN  | 0 | 1 | 1 | 1 | 1 | 0 | 0 | 1 | 0 | Primary |               |
| RM23_HUMAN  | 1 | 0 | 0 | 0 | 1 | 1 | 0 | 1 | 1 | Primary | mit           |
| RM47_HUMAN  | 1 | 0 | 1 | 1 | 1 | 0 | 0 | 0 | 1 | Primary | mit           |
| RM48_HUMAN  | 0 | 1 | 1 | 0 | 1 | 1 | 0 | 1 | 0 | Primary |               |
| RM53_HUMAN  | 0 | 0 | 1 | 0 | 1 | 1 | 1 | 1 | 0 | Primary |               |
| RM54_HUMAN  | 0 | 0 | 1 | 0 | 1 | 1 | 0 | 1 | 1 | Primary |               |
| RM55_HUMAN  | 0 | 0 | 1 | 1 | 1 | 1 | 0 | 1 | 0 | Primary |               |
| RMD1_HUMAN  | 1 | 0 | 0 | 1 | 1 | 1 | 1 | 0 | 0 | Primary | cyt, ske      |
| RN5A_HUMAN  | 1 | 1 | 0 | 1 | 0 | 1 | 0 | 1 | 0 | Primary | cyt, mit      |
| RNH1_HUMAN  | 1 | 0 | 1 | 0 | 1 | 1 | 0 | 0 | 1 | Primary |               |
| S2534_HUMAN | 1 | 0 | 0 | 1 | 1 | 1 | 0 | 1 | 0 | Primary |               |
| S2542_HUMAN | 1 | 0 | 0 | 1 | 1 | 1 | 0 | 1 | 0 | Primary |               |
| SARDH_HUMAN | 1 | 0 | 0 | 1 | 1 | 1 | 0 | 1 | 0 | Primary |               |
| SDHF2_HUMAN | 1 | 0 | 0 | 1 | 1 | 1 | 0 | 0 | 1 | Primary | mit           |
| SIRT3_HUMAN | 1 | 0 | 1 | 1 | 1 | 0 | 0 | 1 | 0 | Primary | mit, mm       |
| SIRT5_HUMAN | 1 | 0 | 1 | 1 | 1 | 0 | 1 | 0 | 0 | Primary |               |
| SYDM_HUMAN  | 1 | 0 | 0 | 1 | 1 | 1 | 0 | 0 | 1 | Primary | mit, mm       |
| SYEM_HUMAN  | 1 | 0 | 0 | 1 | 1 | 1 | 0 | 0 | 1 | Primary |               |
| SYPM_HUMAN  | 1 | 0 | 0 | 1 | 1 | 1 | 0 | 0 | 1 | Primary |               |
| SYRM_HUMAN  | 1 | 0 | 0 | 1 | 1 | 1 | 0 | 0 | 1 | Primary |               |
| SYSC_HUMAN  | 0 | 0 | 1 | 1 | 1 | 1 | 0 | 0 | 1 | Primary | cyt           |
| TFB1M_HUMAN | 0 | 0 | 1 | 1 | 1 | 1 | 0 | 1 | 0 | Primary | mit           |
| TFB2M_HUMAN | 0 | 0 | 1 | 1 | 1 | 1 | 0 | 1 | 0 | Primary | mit           |
| THIO_HUMAN  | 0 | 0 | 1 | 0 | 1 | 1 | 1 | 0 | 1 | Primary | cyt           |
| TI21L_HUMAN | 1 | 0 | 1 | 0 | 1 | 1 | 1 | 0 | 0 | Primary |               |
| TIM14_HUMAN | 1 | 0 | 0 | 0 | 0 | 1 | 1 | 1 | 1 | Primary |               |
| TM40L_HUMAN | 1 | 1 | 0 | 1 | 1 | 1 | 1 | 0 | 0 | Primary |               |
| TYPH_HUMAN  | 0 | 1 | 0 | 1 | 0 | 1 | 1 | 1 | 0 | Primary |               |
| ABCE1_HUMAN | 1 | 0 | 0 | 1 | 0 | 1 | 0 | 1 | 0 | Primary | cyt, mem, mit |
| ABCF2_HUMAN | 0 | 0 | 1 | 1 | 1 | 1 | 0 | 0 | 0 | Primary |               |
| ACACB_HUMAN | 1 | 0 | 1 | 0 | 1 | 0 | 0 | 0 | 1 | Primary |               |
| ACOX1_HUMAN | 1 | 0 | 0 | 0 | 0 | 1 | 1 | 0 | 1 | Primary | per           |
| ACS2A_HUMAN | 1 | 0 | 0 | 1 | 1 | 1 | 0 | 0 | 0 | Primary |               |
| ACSF2_HUMAN | 0 | 0 | 0 | 1 | 1 | 1 | 1 | 0 | 0 | Primary |               |
| ACSM3_HUMAN | 0 | 0 | 1 | 1 | 1 | 1 | 0 | 0 | 0 | Primary |               |
| ACSM5_HUMAN | 0 | 0 | 1 | 1 | 1 | 1 | 0 | 0 | 0 | Primary |               |
| ADCK4_HUMAN | 1 | 0 | 0 | 1 | 1 | 1 | 0 | 0 | 0 | Primary |               |
| AIFM3_HUMAN | 1 | 0 | 1 | 0 | 1 | 0 | 0 | 0 | 1 | Primary | mit, nuc      |
| ALAT1_HUMAN | 0 | 1 | 1 | 1 | 0 | 1 | 0 | 0 | 0 | Primary | cyt           |
| AMP1D_HUMAN | 0 | 0 | 1 | 0 | 1 | 1 | 0 | 1 | 0 | Primary | mit           |
| AMPL_HUMAN  | 0 | 0 | 1 | 1 | 1 | 1 | 0 | 0 | 0 | Primary | cyt           |
| APEX2_HUMAN | 0 | 0 | 1 | 0 | 1 | 1 | 0 | 1 | 0 | Primary |               |
| AT5EL_HUMAN | 1 | 0 | 1 | 1 | 0 | 1 | 0 | 0 | 0 | Primary |               |
| AT5SL_HUMAN | 1 | 0 | 0 | 1 | 1 | 1 | 0 | 0 | 0 | Primary |               |
| ATAD1_HUMAN | 1 | 0 | 0 | 0 | 1 | 1 | 0 | 0 | 1 | Primary |               |
| BACH_HUMAN  | 1 | 0 | 1 | 1 | 0 | 1 | 0 | 0 | 0 | Primary | mit           |
| BBC3_HUMAN  | 1 | 0 | 1 | 0 | 0 | 1 | 0 | 1 | 0 | Primary | mit           |
| BCAT1_HUMAN | 0 | 0 | 0 | 1 | 1 | 1 | 0 | 0 | 1 | Primary | cyt           |
| BID_HUMAN   | 0 | 0 | 1 | 1 | 1 | 1 | 0 | 0 | 0 | Primary | mit           |
| BOLA3_HUMAN | 1 | 0 | 0 | 1 | 0 | 1 | 0 | 0 | 1 | Primary |               |
| BR44L_HUMAN | 0 | 0 | 0 | 1 | 1 | 1 | 0 | 0 | 1 | Primary |               |
| CA069_HUMAN | 1 | 0 | 0 | 0 | 1 | 1 | 0 | 0 | 1 | Primary |               |
| CATA_HUMAN  | 0 | 0 | 1 | 1 | 0 | 1 | 1 | 0 | 0 | Primary | per           |
| CBR4_HUMAN  | 1 | 0 | 0 | 1 | 1 | 1 | 0 | 0 | 0 | Primary | mit, mm       |
| CC001_HUMAN | 0 | 0 | 1 | 1 | 1 | 1 | 0 | 0 | 0 | Primary |               |
| CC90A_HUMAN | 0 | 0 | 0 | 1 | 1 | 1 | 0 | 0 | 1 | Primary |               |
| CC90B_HUMAN | 0 | 0 | 1 | 1 | 1 | 1 | 0 | 0 | 0 | Primary |               |
| CDS1_HUMAN  | 1 | 0 | 1 | 0 | 0 | 1 | 0 | 0 | 1 | Primary |               |
| CF203_HUMAN | 1 | 0 | 0 | 1 | 1 | 1 | 0 | 0 | 0 | Primary |               |
| CISD1_HUMAN | 0 | 0 | 0 | 1 | 1 | 1 | 1 | 0 | 0 | Primary | omm, mit      |
| CL065_HUMAN | 1 | 0 | 0 | 1 | 0 | 1 | 0 | 0 | 1 | Primary |               |
| CLPB_HUMAN  | 1 | 0 | 0 | 0 | 1 | 1 | 0 | 0 | 1 | Primary |               |
| CQ10B_HUMAN | 1 | 0 | 0 | 1 | 1 | 1 | 0 | 0 | 0 | Primary |               |
| CR019_HUMAN | 0 | 0 | 0 | 1 | 1 | 1 | 1 | 0 | 0 | Primary |               |
| CRY1_HUMAN  | 0 | 0 | 1 | 1 | 1 | 1 | 0 | 0 | 0 | Primary | cyt, nuc      |
| DDAH1_HUMAN | 1 | 0 | 0 | 1 | 1 | 1 | 0 | 0 | 0 | Primary |               |
| DHB8_HUMAN  | 1 | 0 | 0 | 1 | 1 | 1 | 0 | 0 | 0 | Primary | mit, mm       |
| DHTK1_HUMAN | 1 | 0 | 0 | 1 | 1 | 1 | 0 | 0 | 0 | Primary |               |

|             |   |   |   |   |   |   |   |   |   |         |                   |
|-------------|---|---|---|---|---|---|---|---|---|---------|-------------------|
| DJC30_HUMAN | 1 | 0 | 0 | 1 | 1 | 1 | 0 | 0 | 0 | Primary |                   |
| DLP1_HUMAN  | 1 | 0 | 1 | 1 | 1 | 0 | 0 | 0 | 0 | Primary |                   |
| ETHE1_HUMAN | 0 | 0 | 1 | 1 | 1 | 1 | 0 | 0 | 0 | Primary | cyt, mit, mm, nuc |
| FKBP8_HUMAN | 0 | 0 | 1 | 0 | 1 | 1 | 0 | 1 | 0 | Primary |                   |
| GHITM_HUMAN | 0 | 0 | 1 | 1 | 1 | 1 | 0 | 0 | 0 | Primary |                   |
| GIMA5_HUMAN | 1 | 0 | 1 | 0 | 0 | 1 | 0 | 1 | 0 | Primary |                   |
| GLPK_HUMAN  | 0 | 0 | 1 | 1 | 1 | 1 | 0 | 0 | 0 | Primary | cyt, omm, mit     |
| HCD2_HUMAN  | 1 | 0 | 0 | 1 | 1 | 1 | 0 | 0 | 0 | Primary | mit               |
| HEMK1_HUMAN | 0 | 0 | 0 | 1 | 1 | 1 | 0 | 0 | 1 | Primary |                   |
| HIG2A_HUMAN | 0 | 0 | 0 | 1 | 1 | 1 | 0 | 0 | 1 | Primary |                   |
| HMG2_HUMAN  | 1 | 0 | 0 | 0 | 0 | 1 | 0 | 1 | 1 | Primary |                   |
| HS90B_HUMAN | 0 | 0 | 1 | 0 | 0 | 1 | 1 | 0 | 1 | Primary | cyt               |
| ICT1_HUMAN  | 1 | 0 | 0 | 1 | 1 | 1 | 0 | 0 | 0 | Primary |                   |
| IDE_HUMAN   | 1 | 0 | 0 | 1 | 1 | 1 | 0 | 0 | 0 | Primary | cyt               |
| IDHC_HUMAN  | 0 | 0 | 0 | 1 | 1 | 1 | 0 | 0 | 1 | Primary | cyt, per          |
| ISCA2_HUMAN | 1 | 0 | 0 | 0 | 1 | 1 | 0 | 0 | 1 | Primary |                   |
| KIF1B_HUMAN | 0 | 1 | 0 | 1 | 0 | 1 | 0 | 1 | 0 | Primary |                   |
| KITH_HUMAN  | 0 | 1 | 0 | 1 | 0 | 1 | 1 | 0 | 0 | Primary | cyt               |
| KMO_HUMAN   | 1 | 0 | 1 | 0 | 0 | 1 | 0 | 0 | 1 | Primary | omm, mit          |
| LPPRC_HUMAN | 0 | 0 | 0 | 1 | 1 | 1 | 0 | 0 | 1 | Primary | mit, nuc          |
| LTMD1_HUMAN | 1 | 0 | 0 | 1 | 1 | 1 | 0 | 0 | 0 | Primary |                   |
| LYRM1_HUMAN | 1 | 0 | 0 | 1 | 1 | 1 | 0 | 0 | 0 | Primary | nuc               |
| LYRM7_HUMAN | 0 | 0 | 0 | 1 | 1 | 1 | 0 | 0 | 1 | Primary |                   |
| MCAR6_HUMAN | 1 | 0 | 1 | 1 | 0 | 1 | 0 | 0 | 0 | Primary |                   |
| MDHC_HUMAN  | 0 | 0 | 0 | 1 | 1 | 1 | 1 | 0 | 0 | Primary | cyt               |
| MIMIT_HUMAN | 1 | 0 | 0 | 1 | 1 | 1 | 0 | 0 | 0 | Primary | mit               |
| MIRO1_HUMAN | 0 | 0 | 1 | 0 | 1 | 1 | 0 | 1 | 0 | Primary |                   |
| MIRO2_HUMAN | 0 | 0 | 1 | 0 | 1 | 1 | 0 | 1 | 0 | Primary |                   |
| MMAB_HUMAN  | 1 | 0 | 0 | 0 | 1 | 1 | 0 | 1 | 0 | Primary |                   |
| MMP37_HUMAN | 1 | 0 | 0 | 0 | 1 | 1 | 0 | 0 | 1 | Primary |                   |
| MPV17_HUMAN | 1 | 0 | 0 | 1 | 1 | 1 | 0 | 0 | 0 | Primary | imm, mit          |
| MSRA_HUMAN  | 0 | 0 | 1 | 1 | 1 | 1 | 0 | 0 | 0 | Primary |                   |
| MSRB2_HUMAN | 0 | 0 | 0 | 1 | 1 | 1 | 1 | 0 | 0 | Primary |                   |
| MTER1_HUMAN | 1 | 0 | 0 | 1 | 1 | 1 | 0 | 0 | 0 | Primary |                   |
| MTER3_HUMAN | 1 | 0 | 0 | 1 | 1 | 1 | 0 | 0 | 0 | Primary | mit               |
| MTFR1_HUMAN | 1 | 0 | 1 | 0 | 1 | 1 | 0 | 0 | 0 | Primary |                   |
| MUL1_HUMAN  | 0 | 0 | 1 | 1 | 1 | 1 | 0 | 0 | 0 | Primary | omm, mit, per     |
| NB5R2_HUMAN | 0 | 0 | 0 | 1 | 1 | 1 | 0 | 0 | 1 | Primary |                   |
| NDUBB_HUMAN | 1 | 0 | 0 | 1 | 0 | 1 | 0 | 1 | 0 | Primary |                   |
| NIPS1_HUMAN | 1 | 0 | 0 | 1 | 1 | 1 | 0 | 0 | 0 | Primary |                   |
| NPS3B_HUMAN | 1 | 0 | 0 | 0 | 1 | 1 | 1 | 0 | 0 | Primary |                   |
| NT5M_HUMAN  | 1 | 0 | 1 | 0 | 1 | 0 | 0 | 1 | 0 | Primary | mit               |
| NU3M_HUMAN  | 1 | 1 | 0 | 0 | 0 | 1 | 1 | 0 | 0 | Primary |                   |
| NUDT8_HUMAN | 1 | 0 | 0 | 1 | 1 | 1 | 0 | 0 | 0 | Primary |                   |
| OAS1_HUMAN  | 0 | 0 | 1 | 1 | 0 | 0 | 1 | 1 | 0 | Primary | mic, mit, nuc     |
| OAS2_HUMAN  | 0 | 0 | 1 | 1 | 0 | 1 | 1 | 0 | 0 | Primary | mic, mit, nuc     |
| OGDHL_HUMAN | 1 | 0 | 0 | 1 | 1 | 1 | 0 | 0 | 0 | Primary |                   |
| OXR1_HUMAN  | 1 | 0 | 1 | 0 | 1 | 1 | 0 | 0 | 0 | Primary | mit               |
| PNKD_HUMAN  | 0 | 0 | 0 | 1 | 1 | 1 | 1 | 0 | 0 | Primary | mit               |
| PRDX1_HUMAN | 0 | 0 | 0 | 1 | 1 | 1 | 1 | 0 | 0 | Primary | cyt               |
| PRDX2_HUMAN | 0 | 0 | 0 | 1 | 1 | 1 | 1 | 0 | 0 | Primary | cyt               |
| PRDX6_HUMAN | 0 | 0 | 0 | 1 | 1 | 1 | 0 | 0 | 1 | Primary |                   |
| PRLD1_HUMAN | 0 | 0 | 0 | 1 | 1 | 1 | 0 | 0 | 1 | Primary |                   |
| PTCD2_HUMAN | 1 | 0 | 0 | 1 | 1 | 1 | 0 | 0 | 0 | Primary |                   |
| PTH_HUMAN   | 0 | 0 | 0 | 1 | 1 | 1 | 0 | 0 | 1 | Primary |                   |
| RAB35_HUMAN | 0 | 0 | 0 | 1 | 1 | 1 | 1 | 0 | 0 | Primary |                   |
| RIMB1_HUMAN | 1 | 0 | 0 | 1 | 0 | 1 | 0 | 1 | 0 | Primary | cyt, mit          |
| RL23_HUMAN  | 1 | 0 | 0 | 1 | 0 | 1 | 0 | 0 | 1 | Primary |                   |
| RM21_HUMAN  | 0 | 0 | 1 | 1 | 1 | 1 | 0 | 0 | 0 | Primary |                   |
| RM38_HUMAN  | 0 | 1 | 1 | 0 | 1 | 0 | 0 | 1 | 0 | Primary |                   |
| RS14_HUMAN  | 0 | 0 | 0 | 1 | 1 | 1 | 0 | 0 | 1 | Primary |                   |
| RUSD4_HUMAN | 1 | 0 | 0 | 1 | 1 | 1 | 0 | 0 | 0 | Primary |                   |
| S13A2_HUMAN | 1 | 0 | 0 | 1 | 0 | 1 | 1 | 0 | 0 | Primary |                   |
| S2541_HUMAN | 1 | 0 | 0 | 1 | 0 | 1 | 0 | 1 | 0 | Primary |                   |
| S2544_HUMAN | 1 | 0 | 0 | 0 | 1 | 1 | 0 | 1 | 0 | Primary |                   |
| S2545_HUMAN | 1 | 0 | 0 | 1 | 0 | 1 | 0 | 1 | 0 | Primary |                   |
| SDSL_HUMAN  | 0 | 0 | 0 | 1 | 1 | 1 | 0 | 0 | 1 | Primary |                   |
| SFXN4_HUMAN | 1 | 0 | 0 | 1 | 1 | 1 | 0 | 0 | 0 | Primary |                   |
| SHC1_HUMAN  | 1 | 0 | 0 | 1 | 0 | 1 | 0 | 1 | 0 | Primary | mit, mm           |
| SLIRP_HUMAN | 0 | 0 | 0 | 1 | 1 | 1 | 1 | 0 | 0 | Primary | mit, nuc          |
| SLMO2_HUMAN | 0 | 0 | 0 | 1 | 1 | 1 | 0 | 0 | 1 | Primary |                   |
| SODC_HUMAN  | 0 | 0 | 0 | 0 | 1 | 1 | 1 | 0 | 1 | Primary | cyt               |
| STML2_HUMAN | 1 | 0 | 0 | 1 | 1 | 1 | 0 | 0 | 0 | Primary |                   |
| SYHM_HUMAN  | 0 | 0 | 1 | 1 | 1 | 1 | 0 | 0 | 0 | Primary |                   |
| SYNC_HUMAN  | 0 | 0 | 0 | 1 | 1 | 1 | 0 | 0 | 1 | Primary | cyt               |
| SYNM_HUMAN  | 0 | 0 | 0 | 1 | 1 | 1 | 0 | 0 | 1 | Primary |                   |
| TBRG4_HUMAN | 0 | 0 | 1 | 1 | 1 | 1 | 0 | 0 | 0 | Primary |                   |
| THTM_HUMAN  | 0 | 0 | 0 | 1 | 1 | 1 | 0 | 0 | 1 | Primary | cyt               |
| TM14B_HUMAN | 0 | 0 | 1 | 1 | 0 | 1 | 0 | 0 | 1 | Primary |                   |
| TRM1_HUMAN  | 1 | 0 | 1 | 0 | 0 | 1 | 0 | 0 | 1 | Primary |                   |
| TSPOA_HUMAN | 1 | 1 | 0 | 0 | 0 | 1 | 0 | 1 | 0 | Primary | mit               |
| USMG5_HUMAN | 0 | 0 | 0 | 1 | 1 | 1 | 1 | 0 | 0 | Primary |                   |
| VATE1_HUMAN | 1 | 0 | 0 | 1 | 0 | 1 | 0 | 0 | 1 | Primary |                   |
| XPP3_HUMAN  | 1 | 0 | 1 | 0 | 0 | 1 | 0 | 0 | 1 | Primary |                   |
| AAT1_HUMAN  | 1 | 0 | 1 | 0 | 0 | 1 | 0 | 0 | 0 | Primary | cyt, mit          |
| ABCD1_HUMAN | 0 | 0 | 0 | 1 | 1 | 1 | 0 | 0 | 0 | Primary | per               |
| ABCD3_HUMAN | 0 | 0 | 0 | 1 | 1 | 1 | 0 | 0 | 0 | Primary | per               |

|              |   |   |   |   |   |   |   |   |   |         |          |
|--------------|---|---|---|---|---|---|---|---|---|---------|----------|
| ABHDA_HUMAN  | 0 | 0 | 1 | 0 | 1 | 0 | 1 | 0 | 0 | Primary |          |
| ACACA_HUMAN  | 0 | 0 | 0 | 1 | 1 | 1 | 0 | 0 | 0 | Primary | cyt      |
| ACBG1_HUMAN  | 0 | 0 | 1 | 1 | 0 | 1 | 0 | 0 | 0 | Primary |          |
| ACD10_HUMAN  | 1 | 0 | 0 | 0 | 1 | 1 | 0 | 0 | 0 | Primary |          |
| ACD11_HUMAN  | 1 | 0 | 0 | 0 | 1 | 1 | 0 | 0 | 0 | Primary |          |
| ACO13_HUMAN  | 0 | 0 | 0 | 1 | 1 | 1 | 0 | 0 | 0 | Primary |          |
| ACSF3_HUMAN  | 0 | 0 | 0 | 1 | 1 | 1 | 0 | 0 | 0 | Primary |          |
| ADCK1_HUMAN  | 0 | 0 | 0 | 1 | 0 | 1 | 0 | 0 | 1 | Primary |          |
| ADCK5_HUMAN  | 0 | 0 | 0 | 1 | 1 | 1 | 0 | 0 | 0 | Primary |          |
| AGK_HUMAN    | 0 | 0 | 1 | 0 | 1 | 0 | 1 | 0 | 0 | Primary | mit      |
| AIBP_HUMAN   | 0 | 0 | 0 | 0 | 1 | 1 | 0 | 0 | 1 | Primary | ext      |
| AKIP_HUMAN   | 0 | 0 | 0 | 1 | 1 | 1 | 0 | 0 | 0 | Primary | nuc      |
| AL1A2_HUMAN  | 0 | 0 | 0 | 0 | 0 | 1 | 1 | 0 | 1 | Primary | cyt      |
| AL1A3_HUMAN  | 0 | 0 | 0 | 1 | 0 | 1 | 1 | 0 | 0 | Primary |          |
| AL1L2_HUMAN  | 0 | 0 | 0 | 1 | 1 | 1 | 0 | 0 | 0 | Primary |          |
| AL3A2_HUMAN  | 1 | 0 | 0 | 1 | 1 | 0 | 0 | 0 | 0 | Primary | end, cyt |
| ALKB7_HUMAN  | 0 | 0 | 0 | 1 | 1 | 1 | 0 | 0 | 0 | Primary |          |
| APOOL_HUMAN  | 0 | 0 | 0 | 1 | 1 | 1 | 0 | 0 | 0 | Primary |          |
| ARK72_HUMAN  | 1 | 0 | 0 | 0 | 1 | 1 | 0 | 0 | 0 | Primary |          |
| ARMC4_HUMAN  | 0 | 0 | 1 | 0 | 1 | 1 | 0 | 0 | 0 | Primary |          |
| AT1A1_HUMAN  | 0 | 0 | 1 | 0 | 0 | 1 | 1 | 0 | 0 | Primary |          |
| ATD3A_HUMAN  | 0 | 0 | 0 | 0 | 1 | 1 | 0 | 1 | 0 | Primary |          |
| ATD3B_HUMAN  | 0 | 0 | 0 | 0 | 1 | 1 | 0 | 1 | 0 | Primary |          |
| ATTY_HUMAN   | 0 | 0 | 0 | 1 | 0 | 1 | 1 | 0 | 0 | Primary |          |
| B2CL2_HUMAN  | 1 | 0 | 1 | 0 | 0 | 1 | 0 | 0 | 0 | Primary | mit      |
| B2L10_HUMAN  | 0 | 0 | 1 | 1 | 0 | 0 | 0 | 1 | 0 | Primary | mit, nuc |
| BIG2_HUMAN   | 0 | 0 | 0 | 1 | 0 | 1 | 0 | 0 | 1 | Primary |          |
| BPHL_HUMAN   | 1 | 0 | 0 | 1 | 1 | 0 | 0 | 0 | 0 | Primary |          |
| CASP8_HUMAN  | 0 | 0 | 1 | 1 | 1 | 0 | 0 | 0 | 0 | Primary | cyt      |
| CATB_HUMAN   | 0 | 0 | 1 | 1 | 0 | 1 | 0 | 0 | 0 | Primary | lys      |
| CBAA1_HUMAN  | 1 | 0 | 0 | 0 | 1 | 0 | 0 | 0 | 1 | Primary |          |
| CCD56_HUMAN  | 0 | 0 | 0 | 1 | 0 | 1 | 1 | 0 | 0 | Primary |          |
| CCS_HUMAN    | 0 | 0 | 0 | 1 | 0 | 1 | 0 | 0 | 1 | Primary | cyt      |
| CDKAL_HUMAN  | 1 | 0 | 0 | 1 | 0 | 1 | 0 | 0 | 0 | Primary |          |
| CHC10_HUMAN  | 0 | 0 | 0 | 1 | 1 | 1 | 0 | 0 | 0 | Primary |          |
| CHCH2_HUMAN  | 0 | 0 | 0 | 1 | 1 | 1 | 0 | 0 | 0 | Primary |          |
| CLYBL_HUMAN  | 0 | 0 | 0 | 1 | 1 | 1 | 0 | 0 | 0 | Primary |          |
| CQ090_HUMAN  | 1 | 0 | 0 | 0 | 1 | 0 | 0 | 0 | 1 | Primary |          |
| CV032_HUMAN  | 0 | 0 | 0 | 1 | 1 | 1 | 0 | 0 | 0 | Primary |          |
| CX6B2_HUMAN  | 1 | 0 | 0 | 0 | 1 | 1 | 0 | 0 | 0 | Primary |          |
| D2HHDH_HUMAN | 1 | 0 | 0 | 0 | 0 | 1 | 0 | 0 | 1 | Primary |          |
| DAPAL_HUMAN  | 0 | 0 | 0 | 1 | 1 | 1 | 0 | 0 | 0 | Primary |          |
| DCXR_HUMAN   | 1 | 0 | 0 | 0 | 0 | 1 | 1 | 0 | 0 | Primary |          |
| DHPR_HUMAN   | 1 | 0 | 0 | 0 | 1 | 1 | 0 | 0 | 0 | Primary |          |
| DHRS1_HUMAN  | 0 | 0 | 0 | 1 | 1 | 1 | 0 | 0 | 0 | Primary |          |
| DHRS4_HUMAN  | 0 | 0 | 0 | 1 | 1 | 1 | 0 | 0 | 0 | Primary | per      |
| DNJA2_HUMAN  | 0 | 0 | 0 | 1 | 0 | 1 | 0 | 0 | 1 | Primary |          |
| DRG2_HUMAN   | 0 | 0 | 0 | 1 | 1 | 1 | 0 | 0 | 0 | Primary | cyt      |
| ECHD2_HUMAN  | 1 | 0 | 0 | 1 | 0 | 1 | 0 | 0 | 0 | Primary |          |
| EXOG_HUMAN   | 1 | 0 | 0 | 0 | 1 | 1 | 0 | 0 | 0 | Primary | imm, mit |
| FAAH2_HUMAN  | 1 | 0 | 0 | 1 | 0 | 1 | 0 | 0 | 0 | Primary |          |
| FAH2A_HUMAN  | 0 | 0 | 0 | 1 | 1 | 1 | 0 | 0 | 0 | Primary |          |
| FASTK_HUMAN  | 0 | 0 | 1 | 1 | 1 | 0 | 0 | 0 | 0 | Primary |          |
| FTHFD_HUMAN  | 0 | 0 | 0 | 1 | 1 | 1 | 0 | 0 | 0 | Primary | cyt      |
| FUND2_HUMAN  | 0 | 0 | 1 | 0 | 1 | 0 | 1 | 0 | 0 | Primary |          |
| G3P_HUMAN    | 0 | 0 | 0 | 0 | 0 | 1 | 1 | 0 | 1 | Primary | cyt, nuc |
| G6PI_HUMAN   | 0 | 0 | 0 | 1 | 0 | 1 | 1 | 0 | 0 | Primary | cyt, ext |
| GLRX3_HUMAN  | 0 | 0 | 0 | 1 | 0 | 1 | 1 | 0 | 0 | Primary | cyt, mem |
| GLYL1_HUMAN  | 0 | 1 | 0 | 1 | 0 | 1 | 0 | 0 | 0 | Primary |          |
| GMPPB_HUMAN  | 0 | 0 | 0 | 1 | 1 | 1 | 0 | 0 | 0 | Primary |          |
| GOLI_HUMAN   | 0 | 0 | 1 | 0 | 0 | 1 | 0 | 1 | 0 | Primary |          |
| GPX1_HUMAN   | 0 | 0 | 0 | 0 | 1 | 1 | 1 | 0 | 0 | Primary | cyt      |
| GTPBA_HUMAN  | 1 | 0 | 0 | 1 | 0 | 1 | 0 | 0 | 0 | Primary | nuc      |
| HAOX2_HUMAN  | 0 | 0 | 0 | 1 | 1 | 1 | 0 | 0 | 0 | Primary | per      |
| HOT_HUMAN    | 0 | 0 | 0 | 1 | 1 | 1 | 0 | 0 | 1 | Primary |          |
| HSDL2_HUMAN  | 0 | 0 | 0 | 0 | 1 | 1 | 1 | 0 | 0 | Primary | per      |
| HXK4_HUMAN   | 0 | 0 | 1 | 1 | 0 | 1 | 0 | 0 | 0 | Primary |          |
| IF2P_HUMAN   | 0 | 0 | 0 | 1 | 0 | 1 | 0 | 0 | 1 | Primary |          |
| IPYR_HUMAN   | 0 | 0 | 1 | 1 | 0 | 1 | 0 | 0 | 0 | Primary |          |
| KAD1_HUMAN   | 0 | 0 | 0 | 1 | 0 | 1 | 1 | 0 | 0 | Primary | cyt      |
| KAT3_HUMAN   | 0 | 0 | 0 | 1 | 1 | 0 | 0 | 0 | 1 | Primary |          |
| LACB2_HUMAN  | 0 | 0 | 0 | 1 | 1 | 1 | 0 | 0 | 0 | Primary |          |
| LDH6B_HUMAN  | 1 | 0 | 0 | 0 | 1 | 1 | 0 | 0 | 0 | Primary |          |
| LIPB_HUMAN   | 1 | 0 | 0 | 1 | 0 | 0 | 0 | 0 | 1 | Primary |          |
| LYRM2_HUMAN  | 0 | 0 | 0 | 1 | 1 | 1 | 0 | 0 | 0 | Primary |          |
| M11D1_HUMAN  | 0 | 0 | 0 | 0 | 1 | 1 | 0 | 0 | 1 | Primary |          |
| MAAI_HUMAN   | 0 | 0 | 1 | 1 | 0 | 1 | 0 | 0 | 0 | Primary |          |
| MAVS_HUMAN   | 1 | 0 | 0 | 0 | 1 | 1 | 0 | 0 | 0 | Primary | omm, mit |
| MCP62_HUMAN  | 1 | 0 | 0 | 0 | 0 | 1 | 0 | 1 | 0 | Primary |          |
| MIDA_HUMAN   | 0 | 0 | 0 | 1 | 1 | 1 | 0 | 0 | 0 | Primary |          |
| MMAA_HUMAN   | 1 | 0 | 0 | 0 | 0 | 1 | 0 | 1 | 0 | Primary |          |
| MOCS1_HUMAN  | 1 | 0 | 0 | 1 | 0 | 1 | 0 | 0 | 0 | Primary |          |
| MOSC2_HUMAN  | 0 | 0 | 1 | 0 | 1 | 1 | 0 | 0 | 0 | Primary | omm, mit |
| MTD2L_HUMAN  | 1 | 0 | 0 | 0 | 1 | 1 | 0 | 0 | 0 | Primary |          |
| MTG1_HUMAN   | 0 | 0 | 0 | 0 | 1 | 1 | 0 | 0 | 1 | Primary | mit      |
| MTRR_HUMAN   | 0 | 1 | 0 | 1 | 0 | 0 | 0 | 1 | 0 | Primary |          |
| NBSR1_HUMAN  | 0 | 0 | 0 | 0 | 1 | 1 | 1 | 0 | 0 | Primary |          |

|             |   |   |   |   |   |   |   |   |   |         |               |
|-------------|---|---|---|---|---|---|---|---|---|---------|---------------|
| NDKB_HUMAN  | 0 | 0 | 0 | 0 | 1 | 1 | 1 | 0 | 0 | Primary | cyt, nuc      |
| NIT2_HUMAN  | 0 | 0 | 0 | 1 | 0 | 1 | 0 | 0 | 1 | Primary | cyt           |
| NPS3A_HUMAN | 1 | 0 | 0 | 0 | 0 | 1 | 0 | 0 | 0 | Primary | cyt, lys      |
| NUBPL_HUMAN | 1 | 0 | 0 | 1 | 1 | 0 | 0 | 0 | 0 | Primary |               |
| NUDT6_HUMAN | 1 | 0 | 1 | 0 | 0 | 1 | 0 | 0 | 0 | Primary |               |
| OSGP2_HUMAN | 0 | 0 | 0 | 0 | 1 | 1 | 0 | 0 | 1 | Primary |               |
| OXND1_HUMAN | 0 | 0 | 0 | 1 | 1 | 1 | 0 | 0 | 0 | Primary |               |
| PA21B_HUMAN | 0 | 0 | 0 | 1 | 0 | 1 | 1 | 0 | 0 | Primary | ext           |
| PA2GA_HUMAN | 0 | 0 | 0 | 1 | 0 | 1 | 1 | 0 | 0 | Primary |               |
| PAF_HUMAN   | 1 | 0 | 1 | 0 | 0 | 1 | 0 | 0 | 0 | Primary | mit, nuc      |
| PAK7_HUMAN  | 0 | 0 | 1 | 0 | 1 | 1 | 0 | 0 | 0 | Primary |               |
| PARK7_HUMAN | 0 | 0 | 1 | 0 | 1 | 0 | 0 | 1 | 0 | Primary | cyt, mit, nuc |
| PECI_HUMAN  | 0 | 0 | 1 | 0 | 1 | 0 | 1 | 0 | 0 | Primary | per           |
| PECR_HUMAN  | 1 | 0 | 0 | 1 | 0 | 1 | 0 | 0 | 0 | Primary | per           |
| PIN4_HUMAN  | 0 | 0 | 1 | 1 | 0 | 1 | 0 | 0 | 0 | Primary |               |
| PLCE_HUMAN  | 1 | 0 | 1 | 0 | 1 | 0 | 0 | 0 | 0 | Primary |               |
| PPIA_HUMAN  | 0 | 0 | 0 | 1 | 0 | 1 | 1 | 0 | 0 | Primary | cyt           |
| PPM1K_HUMAN | 0 | 0 | 1 | 0 | 1 | 0 | 0 | 1 | 0 | Primary | mit, mm       |
| PRLD2_HUMAN | 0 | 0 | 0 | 1 | 1 | 1 | 0 | 0 | 0 | Primary |               |
| PROD2_HUMAN | 1 | 0 | 0 | 0 | 1 | 1 | 0 | 0 | 0 | Primary |               |
| PTCD1_HUMAN | 1 | 0 | 0 | 0 | 0 | 1 | 0 | 0 | 1 | Primary |               |
| PTCD3_HUMAN | 0 | 0 | 0 | 1 | 1 | 1 | 0 | 0 | 0 | Primary |               |
| PUR9_HUMAN  | 0 | 0 | 0 | 1 | 1 | 1 | 0 | 0 | 0 | Primary |               |
| PX11B_HUMAN | 1 | 0 | 0 | 0 | 1 | 1 | 0 | 0 | 0 | Primary | per           |
| PXMP2_HUMAN | 0 | 0 | 0 | 1 | 1 | 1 | 0 | 0 | 0 | Primary | per           |
| PYR1_HUMAN  | 0 | 0 | 0 | 1 | 0 | 1 | 0 | 0 | 1 | Primary | cyt           |
| RIFK_HUMAN  | 1 | 0 | 0 | 0 | 1 | 0 | 0 | 0 | 1 | Primary |               |
| RL8_HUMAN   | 0 | 0 | 0 | 1 | 0 | 1 | 0 | 0 | 1 | Primary | cyt           |
| RMND1_HUMAN | 1 | 0 | 0 | 1 | 1 | 0 | 0 | 0 | 0 | Primary |               |
| RMTL1_HUMAN | 0 | 0 | 0 | 1 | 1 | 1 | 0 | 0 | 0 | Primary |               |
| ROMO1_HUMAN | 0 | 0 | 0 | 1 | 1 | 1 | 0 | 0 | 0 | Primary | mit           |
| RRMJ2_HUMAN | 1 | 0 | 0 | 0 | 1 | 0 | 0 | 0 | 1 | Primary | nuc           |
| RS13_HUMAN  | 1 | 0 | 0 | 1 | 0 | 1 | 0 | 0 | 0 | Primary |               |
| RSAD1_HUMAN | 0 | 0 | 0 | 1 | 1 | 1 | 0 | 0 | 0 | Primary |               |
| RUSD1_HUMAN | 1 | 0 | 0 | 1 | 0 | 1 | 0 | 0 | 0 | Primary |               |
| RUSD2_HUMAN | 0 | 0 | 0 | 1 | 0 | 1 | 0 | 0 | 1 | Primary |               |
| S7A14_HUMAN | 0 | 0 | 0 | 1 | 0 | 1 | 0 | 0 | 1 | Primary |               |
| SELB_HUMAN  | 0 | 0 | 0 | 1 | 1 | 1 | 0 | 0 | 0 | Primary |               |
| SLMO1_HUMAN | 0 | 0 | 0 | 1 | 1 | 1 | 0 | 0 | 0 | Primary |               |
| SPRY4_HUMAN | 1 | 0 | 0 | 0 | 1 | 0 | 1 | 0 | 0 | Primary |               |
| SRR_HUMAN   | 0 | 0 | 0 | 1 | 0 | 1 | 0 | 0 | 1 | Primary |               |
| SYAC_HUMAN  | 0 | 0 | 0 | 1 | 0 | 1 | 0 | 0 | 1 | Primary |               |
| SYAM_HUMAN  | 0 | 0 | 0 | 1 | 1 | 1 | 0 | 0 | 0 | Primary |               |
| SYFA_HUMAN  | 0 | 0 | 0 | 1 | 0 | 1 | 0 | 0 | 1 | Primary |               |
| SYG_HUMAN   | 0 | 0 | 0 | 1 | 1 | 0 | 0 | 0 | 1 | Primary |               |
| SYIC_HUMAN  | 0 | 0 | 1 | 1 | 0 | 1 | 0 | 0 | 0 | Primary | cyt           |
| SYTC_HUMAN  | 0 | 0 | 0 | 1 | 0 | 1 | 0 | 0 | 1 | Primary | cyt           |
| SYTM_HUMAN  | 0 | 0 | 0 | 1 | 1 | 1 | 0 | 0 | 0 | Primary |               |
| SYVM_HUMAN  | 0 | 0 | 0 | 1 | 1 | 1 | 0 | 0 | 0 | Primary |               |
| T126A_HUMAN | 0 | 0 | 1 | 0 | 1 | 0 | 1 | 0 | 0 | Primary |               |
| TCPH_HUMAN  | 0 | 0 | 0 | 1 | 1 | 1 | 0 | 0 | 0 | Primary |               |
| TDRD5_HUMAN | 0 | 0 | 0 | 1 | 0 | 1 | 0 | 0 | 1 | Primary |               |
| THEM5_HUMAN | 0 | 0 | 0 | 1 | 1 | 1 | 0 | 0 | 0 | Primary |               |
| THIK_HUMAN  | 0 | 0 | 0 | 1 | 1 | 1 | 0 | 0 | 0 | Primary | per           |
| TM143_HUMAN | 0 | 0 | 1 | 0 | 1 | 0 | 1 | 0 | 0 | Primary |               |
| TM14C_HUMAN | 0 | 0 | 0 | 1 | 1 | 1 | 0 | 0 | 0 | Primary |               |
| TMM70_HUMAN | 0 | 0 | 0 | 1 | 1 | 1 | 0 | 0 | 0 | Primary |               |
| TO20L_HUMAN | 1 | 0 | 0 | 1 | 0 | 1 | 0 | 0 | 0 | Primary |               |
| TRXR3_HUMAN | 0 | 0 | 0 | 1 | 0 | 1 | 0 | 0 | 1 | Primary |               |
| TSPOB_HUMAN | 0 | 0 | 1 | 0 | 1 | 0 | 1 | 0 | 0 | Primary |               |
| TSTD1_HUMAN | 1 | 0 | 0 | 1 | 0 | 0 | 0 | 0 | 1 | Primary | cyt, nuc      |
| UXS1_HUMAN  | 0 | 0 | 0 | 1 | 1 | 1 | 0 | 0 | 0 | Primary |               |
| WBS16_HUMAN | 1 | 0 | 1 | 0 | 1 | 0 | 0 | 0 | 0 | Primary |               |
| ZNT6_HUMAN  | 0 | 0 | 0 | 1 | 1 | 1 | 0 | 0 | 0 | Primary | gol           |
| 1433E_HUMAN | 0 | 1 | 0 | 0 | 0 | 0 | 1 | 0 | 0 | Primary |               |
| 1433Z_HUMAN | 0 | 0 | 0 | 0 | 0 | 1 | 1 | 0 | 0 | Primary | cyt           |
| 3MG_HUMAN   | 0 | 0 | 0 | 1 | 0 | 1 | 0 | 0 | 0 | Primary |               |
| 5NT3_HUMAN  | 0 | 0 | 1 | 0 | 1 | 0 | 0 | 0 | 0 | Primary | end           |
| 8ODP_HUMAN  | 0 | 0 | 0 | 1 | 0 | 1 | 0 | 0 | 0 | Primary |               |
| AAA1_HUMAN  | 0 | 0 | 0 | 1 | 0 | 1 | 0 | 0 | 0 | Primary |               |
| ABCA5_HUMAN | 0 | 0 | 0 | 1 | 0 | 1 | 0 | 0 | 0 | Primary | lys           |
| ABCC9_HUMAN | 0 | 0 | 1 | 0 | 0 | 0 | 0 | 0 | 1 | Primary |               |
| ABCD2_HUMAN | 1 | 0 | 0 | 0 | 1 | 0 | 0 | 0 | 0 | Primary | per           |
| ACBG2_HUMAN | 0 | 0 | 0 | 1 | 0 | 1 | 0 | 0 | 0 | Primary | cyt           |
| ACBP_HUMAN  | 0 | 0 | 1 | 0 | 0 | 1 | 0 | 0 | 0 | Primary |               |
| ACCN3_HUMAN | 0 | 0 | 1 | 1 | 0 | 0 | 0 | 0 | 0 | Primary |               |
| ACLY_HUMAN  | 0 | 0 | 0 | 1 | 1 | 0 | 0 | 0 | 0 | Primary | cyt           |
| ACO11_HUMAN | 1 | 0 | 0 | 1 | 0 | 0 | 0 | 0 | 0 | Primary | cyt           |
| ACSA_HUMAN  | 0 | 0 | 0 | 0 | 0 | 1 | 0 | 0 | 1 | Primary | cyt           |
| ACSF4_HUMAN | 0 | 0 | 0 | 1 | 0 | 1 | 0 | 0 | 0 | Primary |               |
| ACSM4_HUMAN | 0 | 0 | 0 | 1 | 1 | 0 | 0 | 0 | 0 | Primary |               |
| ACSS3_HUMAN | 0 | 0 | 0 | 1 | 0 | 1 | 0 | 0 | 0 | Primary |               |
| ADAS_HUMAN  | 0 | 0 | 0 | 0 | 1 | 0 | 0 | 0 | 1 | Primary | per           |
| AL7A1_HUMAN | 0 | 0 | 0 | 0 | 1 | 0 | 1 | 0 | 0 | Primary |               |
| AL9A1_HUMAN | 0 | 0 | 0 | 1 | 1 | 0 | 0 | 0 | 0 | Primary |               |
| ALDOC_HUMAN | 0 | 0 | 0 | 0 | 0 | 1 | 1 | 0 | 0 | Primary |               |
| ANX10_HUMAN | 0 | 0 | 1 | 0 | 0 | 1 | 0 | 0 | 0 | Primary |               |

|             |   |   |   |   |   |   |   |   |   |         |               |
|-------------|---|---|---|---|---|---|---|---|---|---------|---------------|
| APOO_HUMAN  | 0 | 0 | 0 | 1 | 0 | 1 | 0 | 0 | 0 | Primary |               |
| APR_HUMAN   | 0 | 0 | 1 | 0 | 0 | 1 | 0 | 0 | 0 | Primary | mit           |
| ARAF_HUMAN  | 0 | 0 | 1 | 0 | 0 | 1 | 0 | 0 | 0 | Primary |               |
| ARK73_HUMAN | 1 | 0 | 0 | 0 | 0 | 1 | 0 | 0 | 0 | Primary | cyt           |
| ASML_HUMAN  | 0 | 0 | 0 | 1 | 0 | 1 | 0 | 0 | 0 | Primary |               |
| ASXL2_HUMAN | 0 | 0 | 0 | 1 | 0 | 1 | 0 | 0 | 0 | Primary |               |
| AT2L1_HUMAN | 1 | 0 | 1 | 0 | 0 | 0 | 0 | 0 | 0 | Primary |               |
| AT5L2_HUMAN | 1 | 0 | 0 | 0 | 0 | 1 | 0 | 0 | 0 | Primary |               |
| ATD3C_HUMAN | 0 | 0 | 0 | 0 | 0 | 1 | 0 | 1 | 0 | Primary |               |
| B2L14_HUMAN | 0 | 0 | 1 | 0 | 0 | 1 | 0 | 0 | 0 | Primary |               |
| BIK_HUMAN   | 0 | 0 | 1 | 0 | 0 | 1 | 0 | 0 | 0 | Primary | cyt, nuc      |
| C27C1_HUMAN | 1 | 0 | 0 | 0 | 0 | 1 | 0 | 0 | 0 | Primary |               |
| CA151_HUMAN | 0 | 0 | 0 | 0 | 1 | 0 | 1 | 0 | 0 | Primary |               |
| CASP4_HUMAN | 0 | 0 | 1 | 0 | 0 | 0 | 0 | 0 | 1 | Primary |               |
| CASQ2_HUMAN | 0 | 0 | 0 | 0 | 0 | 0 | 1 | 0 | 1 | Primary |               |
| CATD_HUMAN  | 0 | 0 | 0 | 0 | 0 | 1 | 1 | 0 | 0 | Primary | lys           |
| CC023_HUMAN | 0 | 0 | 1 | 0 | 1 | 0 | 0 | 0 | 0 | Primary |               |
| CC108_HUMAN | 0 | 0 | 0 | 1 | 0 | 1 | 0 | 0 | 0 | Primary |               |
| CD014_HUMAN | 0 | 0 | 0 | 0 | 1 | 1 | 0 | 0 | 0 | Primary |               |
| CG030_HUMAN | 0 | 0 | 0 | 1 | 0 | 1 | 0 | 0 | 0 | Primary |               |
| CHCH6_HUMAN | 0 | 0 | 0 | 0 | 0 | 1 | 1 | 0 | 0 | Primary |               |
| CHCH7_HUMAN | 0 | 0 | 0 | 0 | 1 | 0 | 0 | 0 | 1 | Primary |               |
| CHCH9_HUMAN | 0 | 0 | 0 | 1 | 0 | 1 | 0 | 0 | 0 | Primary |               |
| CI046_HUMAN | 0 | 0 | 0 | 0 | 1 | 0 | 1 | 0 | 0 | Primary |               |
| CK5P1_HUMAN | 1 | 0 | 0 | 1 | 0 | 0 | 0 | 0 | 0 | Primary |               |
| CLIC4_HUMAN | 0 | 0 | 0 | 0 | 1 | 1 | 0 | 0 | 0 | Primary |               |
| CN153_HUMAN | 0 | 0 | 0 | 0 | 1 | 1 | 0 | 0 | 0 | Primary |               |
| CNDP2_HUMAN | 0 | 0 | 0 | 0 | 0 | 1 | 0 | 0 | 1 | Primary | cyt           |
| CNNM4_HUMAN | 0 | 0 | 0 | 1 | 0 | 1 | 0 | 0 | 0 | Primary |               |
| CRY2_HUMAN  | 0 | 0 | 0 | 0 | 0 | 1 | 0 | 0 | 1 | Primary | cyt, nuc      |
| CT007_HUMAN | 0 | 0 | 0 | 1 | 0 | 1 | 0 | 0 | 0 | Primary | imm, mit      |
| CT072_HUMAN | 1 | 0 | 0 | 0 | 1 | 0 | 0 | 0 | 0 | Primary |               |
| CTR1_HUMAN  | 0 | 0 | 0 | 1 | 0 | 1 | 0 | 0 | 0 | Primary |               |
| CTR2_HUMAN  | 0 | 0 | 0 | 1 | 0 | 1 | 0 | 0 | 0 | Primary |               |
| CTR3_HUMAN  | 0 | 0 | 0 | 1 | 0 | 1 | 0 | 0 | 0 | Primary | mem           |
| CTU1_HUMAN  | 0 | 0 | 0 | 0 | 1 | 0 | 0 | 0 | 1 | Primary | cyt           |
| CU057_HUMAN | 0 | 0 | 0 | 1 | 1 | 0 | 0 | 0 | 0 | Primary |               |
| CX4NB_HUMAN | 0 | 0 | 0 | 1 | 0 | 1 | 0 | 0 | 0 | Primary |               |
| CYB5_HUMAN  | 0 | 0 | 1 | 0 | 0 | 1 | 0 | 0 | 0 | Primary | cyt           |
| CYBR1_HUMAN | 0 | 0 | 0 | 1 | 0 | 1 | 0 | 0 | 0 | Primary |               |
| D39U1_HUMAN | 0 | 0 | 0 | 1 | 0 | 1 | 0 | 0 | 0 | Primary |               |
| DCTN6_HUMAN | 0 | 0 | 1 | 0 | 0 | 1 | 0 | 0 | 0 | Primary |               |
| DDX18_HUMAN | 0 | 0 | 0 | 0 | 0 | 1 | 0 | 0 | 1 | Primary |               |
| DEPP_HUMAN  | 0 | 0 | 1 | 0 | 1 | 0 | 0 | 0 | 0 | Primary |               |
| DGLB_HUMAN  | 0 | 0 | 0 | 1 | 0 | 1 | 0 | 0 | 0 | Primary | mem           |
| DHRS2_HUMAN | 0 | 0 | 0 | 1 | 0 | 1 | 0 | 0 | 0 | Primary | nuc           |
| DHRSX_HUMAN | 1 | 0 | 0 | 0 | 0 | 1 | 0 | 0 | 0 | Primary |               |
| DHX29_HUMAN | 0 | 0 | 0 | 0 | 1 | 0 | 0 | 0 | 1 | Primary |               |
| DIMT1_HUMAN | 0 | 0 | 0 | 1 | 0 | 1 | 0 | 0 | 0 | Primary | nuc           |
| DISC1_HUMAN | 0 | 0 | 1 | 1 | 0 | 0 | 0 | 0 | 0 | Primary | cyt, cen, ske |
| DJC11_HUMAN | 0 | 0 | 0 | 0 | 1 | 0 | 1 | 0 | 0 | Primary |               |
| DJC15_HUMAN | 1 | 0 | 0 | 0 | 0 | 1 | 0 | 0 | 0 | Primary |               |
| DNJA1_HUMAN | 0 | 1 | 0 | 0 | 0 | 0 | 0 | 1 | 0 | Primary |               |
| DPOLQ_HUMAN | 0 | 0 | 0 | 1 | 0 | 1 | 0 | 0 | 0 | Primary |               |
| DPYL2_HUMAN | 0 | 0 | 1 | 0 | 0 | 1 | 0 | 0 | 0 | Primary |               |
| DR4L2_HUMAN | 0 | 0 | 0 | 1 | 0 | 1 | 0 | 0 | 0 | Primary |               |
| DYH11_HUMAN | 0 | 0 | 0 | 0 | 0 | 1 | 0 | 0 | 1 | Primary |               |
| DYSI1_HUMAN | 0 | 0 | 0 | 1 | 0 | 1 | 0 | 0 | 0 | Primary |               |
| ECHP_HUMAN  | 1 | 0 | 0 | 0 | 1 | 0 | 0 | 0 | 0 | Primary | per           |
| EFHA1_HUMAN | 1 | 0 | 0 | 0 | 0 | 1 | 0 | 0 | 0 | Primary |               |
| EFHD1_HUMAN | 0 | 0 | 0 | 0 | 1 | 1 | 0 | 0 | 0 | Primary |               |
| EFR3A_HUMAN | 0 | 0 | 0 | 1 | 0 | 1 | 0 | 0 | 0 | Primary |               |
| ELN_HUMAN   | 0 | 0 | 1 | 0 | 1 | 0 | 0 | 0 | 0 | Primary | ext           |
| ERAL_HUMAN  | 1 | 0 | 0 | 1 | 0 | 0 | 0 | 0 | 0 | Primary |               |
| ESR2_HUMAN  | 0 | 0 | 0 | 1 | 0 | 1 | 0 | 0 | 0 | Primary | nuc           |
| F136A_HUMAN | 0 | 0 | 0 | 0 | 1 | 1 | 0 | 0 | 0 | Primary |               |
| F162A_HUMAN | 0 | 0 | 0 | 0 | 1 | 0 | 1 | 0 | 0 | Primary |               |
| F195A_HUMAN | 0 | 0 | 0 | 1 | 0 | 1 | 0 | 0 | 0 | Primary |               |
| FAH2B_HUMAN | 0 | 0 | 0 | 1 | 0 | 1 | 0 | 0 | 0 | Primary |               |
| FAKD3_HUMAN | 0 | 0 | 0 | 1 | 0 | 1 | 0 | 0 | 0 | Primary |               |
| FAS_HUMAN   | 0 | 0 | 0 | 1 | 1 | 0 | 0 | 0 | 0 | Primary | cyt           |
| FDXA1_HUMAN | 1 | 0 | 0 | 0 | 0 | 0 | 0 | 0 | 1 | Primary |               |
| FLOT1_HUMAN | 0 | 0 | 0 | 1 | 0 | 1 | 0 | 0 | 0 | Primary | mem           |
| FRAP_HUMAN  | 0 | 0 | 1 | 0 | 0 | 0 | 0 | 0 | 1 | Primary | gol, end, cyt |
| FUCT1_HUMAN | 0 | 0 | 0 | 1 | 0 | 1 | 0 | 0 | 0 | Primary | gol           |
| GCP60_HUMAN | 0 | 0 | 0 | 0 | 0 | 1 | 0 | 1 | 0 | Primary |               |
| GELS_HUMAN  | 0 | 0 | 1 | 0 | 0 | 0 | 1 | 0 | 0 | Primary | ext           |
| GIDRP_HUMAN | 0 | 1 | 0 | 0 | 0 | 0 | 0 | 1 | 0 | Primary |               |
| GLNA_HUMAN  | 0 | 0 | 1 | 0 | 0 | 1 | 0 | 0 | 0 | Primary | cyt           |
| GLYL2_HUMAN | 0 | 0 | 0 | 1 | 0 | 1 | 0 | 0 | 0 | Primary |               |
| GMPPA_HUMAN | 0 | 0 | 0 | 1 | 0 | 1 | 0 | 0 | 0 | Primary |               |
| GPDA_HUMAN  | 0 | 0 | 0 | 0 | 1 | 0 | 0 | 0 | 1 | Primary | cyt           |
| GRHPR_HUMAN | 1 | 0 | 0 | 0 | 0 | 0 | 1 | 0 | 0 | Primary |               |
| GRP78_HUMAN | 0 | 0 | 0 | 0 | 0 | 0 | 1 | 0 | 1 | Primary | end           |
| GRSF1_HUMAN | 0 | 0 | 0 | 1 | 1 | 0 | 0 | 0 | 0 | Primary | cyt           |
| GSTO1_HUMAN | 0 | 0 | 0 | 1 | 0 | 1 | 0 | 0 | 0 | Primary | cyt           |
| GTPB8_HUMAN | 0 | 0 | 0 | 0 | 1 | 0 | 0 | 0 | 1 | Primary |               |

|             |   |   |   |   |   |   |   |   |   |         |               |
|-------------|---|---|---|---|---|---|---|---|---|---------|---------------|
| GUAA_HUMAN  | 0 | 0 | 0 | 1 | 0 | 1 | 0 | 0 | 0 | Primary | cyt           |
| HAOX1_HUMAN | 0 | 0 | 0 | 0 | 0 | 1 | 0 | 0 | 1 | Primary | per           |
| HBA_HUMAN   | 0 | 0 | 0 | 0 | 0 | 1 | 1 | 0 | 0 | Primary |               |
| HBB_HUMAN   | 0 | 0 | 0 | 0 | 0 | 1 | 1 | 0 | 0 | Primary |               |
| HBG2_HUMAN  | 0 | 1 | 0 | 0 | 0 | 0 | 1 | 0 | 0 | Primary |               |
| HDHD3_HUMAN | 0 | 0 | 0 | 0 | 0 | 1 | 1 | 0 | 0 | Primary |               |
| HIG1A_HUMAN | 0 | 0 | 0 | 1 | 0 | 1 | 0 | 0 | 0 | Primary |               |
| HIG2B_HUMAN | 0 | 0 | 0 | 1 | 0 | 1 | 0 | 0 | 0 | Primary |               |
| HMCS1_HUMAN | 0 | 0 | 0 | 1 | 0 | 1 | 0 | 0 | 0 | Primary | cyt           |
| HPDL_HUMAN  | 0 | 0 | 0 | 1 | 0 | 1 | 0 | 0 | 0 | Primary |               |
| HSP71_HUMAN | 0 | 1 | 0 | 0 | 0 | 0 | 1 | 0 | 0 | Primary | cyt           |
| HSPB1_HUMAN | 0 | 0 | 0 | 1 | 0 | 1 | 0 | 0 | 0 | Primary | cyt, ske, nuc |
| HSPB6_HUMAN | 0 | 0 | 0 | 1 | 0 | 1 | 0 | 0 | 0 | Primary |               |
| HSPB8_HUMAN | 0 | 0 | 0 | 1 | 0 | 1 | 0 | 0 | 0 | Primary |               |
| HSPB9_HUMAN | 0 | 0 | 0 | 1 | 0 | 1 | 0 | 0 | 0 | Primary |               |
| IFIT3_HUMAN | 0 | 0 | 0 | 1 | 0 | 1 | 0 | 0 | 0 | Primary |               |
| IMP3_HUMAN  | 0 | 1 | 0 | 0 | 0 | 0 | 1 | 0 | 0 | Primary | nuc           |
| IQCE_HUMAN  | 0 | 0 | 1 | 0 | 1 | 0 | 0 | 0 | 0 | Primary |               |
| K0564_HUMAN | 0 | 0 | 0 | 1 | 0 | 1 | 0 | 0 | 0 | Primary |               |
| K0664_HUMAN | 0 | 0 | 0 | 1 | 0 | 1 | 0 | 0 | 0 | Primary |               |
| KAT1_HUMAN  | 0 | 0 | 1 | 1 | 0 | 0 | 0 | 0 | 0 | Primary | cyt           |
| KCRB_HUMAN  | 0 | 0 | 1 | 0 | 0 | 1 | 0 | 0 | 0 | Primary | cyt           |
| KCY_HUMAN   | 0 | 0 | 0 | 1 | 0 | 1 | 0 | 0 | 0 | Primary | cyt, nuc      |
| KPYM_HUMAN  | 0 | 0 | 0 | 0 | 0 | 1 | 1 | 0 | 0 | Primary | cyt, nuc      |
| LAT1_HUMAN  | 0 | 0 | 0 | 1 | 0 | 1 | 0 | 0 | 0 | Primary | cyt, mem      |
| LAT1N_HUMAN | 0 | 0 | 0 | 1 | 0 | 1 | 0 | 0 | 0 | Primary |               |
| LCLT1_HUMAN | 1 | 0 | 1 | 0 | 0 | 0 | 0 | 0 | 0 | Primary | end           |
| LDHA_HUMAN  | 0 | 0 | 0 | 0 | 1 | 1 | 0 | 0 | 0 | Primary | cyt           |
| LDHB_HUMAN  | 0 | 0 | 0 | 0 | 1 | 0 | 1 | 0 | 0 | Primary | cyt           |
| LYPA1_HUMAN | 1 | 0 | 0 | 0 | 0 | 1 | 0 | 0 | 0 | Primary |               |
| LYPL1_HUMAN | 1 | 0 | 0 | 0 | 0 | 0 | 1 | 0 | 0 | Primary |               |
| LYSC_HUMAN  | 0 | 0 | 0 | 0 | 0 | 1 | 1 | 0 | 0 | Primary |               |
| M17L2_HUMAN | 0 | 0 | 0 | 1 | 1 | 0 | 0 | 0 | 0 | Primary |               |
| M3K5_HUMAN  | 0 | 0 | 0 | 1 | 0 | 1 | 0 | 0 | 0 | Primary |               |
| MACD1_HUMAN | 0 | 0 | 0 | 0 | 0 | 1 | 1 | 0 | 0 | Primary |               |
| MCAR2_HUMAN | 1 | 0 | 1 | 0 | 0 | 0 | 0 | 0 | 0 | Primary |               |
| MCCD1_HUMAN | 1 | 0 | 0 | 0 | 0 | 0 | 0 | 1 | 0 | Primary | mit           |
| MCL1_HUMAN  | 0 | 0 | 1 | 0 | 0 | 1 | 0 | 0 | 0 | Primary |               |
| MFSD8_HUMAN | 1 | 0 | 0 | 0 | 0 | 0 | 0 | 0 | 1 | Primary | lys           |
| MK12_HUMAN  | 1 | 0 | 0 | 0 | 0 | 0 | 0 | 1 | 0 | Primary | cyt, mit      |
| MMAD_HUMAN  | 0 | 0 | 1 | 0 | 0 | 1 | 0 | 0 | 0 | Primary |               |
| MOCOS_HUMAN | 1 | 0 | 0 | 0 | 0 | 1 | 0 | 0 | 0 | Primary |               |
| MOSC1_HUMAN | 0 | 0 | 0 | 0 | 1 | 1 | 0 | 0 | 0 | Primary |               |
| MOT1_HUMAN  | 0 | 0 | 1 | 0 | 1 | 0 | 0 | 0 | 0 | Primary | mem           |
| MRP9_HUMAN  | 0 | 0 | 0 | 0 | 1 | 0 | 0 | 1 | 0 | Primary |               |
| MSRB3_HUMAN | 0 | 0 | 1 | 0 | 0 | 1 | 0 | 0 | 0 | Primary | end           |
| MTCPB_HUMAN | 0 | 0 | 1 | 0 | 1 | 0 | 0 | 0 | 0 | Primary |               |
| MTER2_HUMAN | 0 | 0 | 0 | 1 | 0 | 1 | 0 | 0 | 0 | Primary |               |
| MTX3_HUMAN  | 1 | 0 | 0 | 0 | 0 | 1 | 0 | 0 | 0 | Primary |               |
| MYL10_HUMAN | 0 | 0 | 1 | 0 | 1 | 0 | 0 | 0 | 0 | Primary |               |
| NAPEP_HUMAN | 1 | 0 | 0 | 0 | 0 | 0 | 0 | 0 | 1 | Primary |               |
| NCOA7_HUMAN | 0 | 0 | 0 | 1 | 0 | 1 | 0 | 0 | 0 | Primary |               |
| NDK3_HUMAN  | 0 | 0 | 1 | 0 | 1 | 0 | 0 | 0 | 0 | Primary |               |
| NDK8_HUMAN  | 0 | 0 | 0 | 1 | 0 | 1 | 0 | 0 | 0 | Primary |               |
| NIF3L_HUMAN | 0 | 0 | 0 | 0 | 1 | 0 | 0 | 0 | 1 | Primary | cyt           |
| NIT1_HUMAN  | 0 | 0 | 0 | 0 | 1 | 1 | 0 | 0 | 0 | Primary |               |
| NLRX1_HUMAN | 0 | 0 | 0 | 0 | 1 | 0 | 1 | 0 | 0 | Primary | omm, mit      |
| NMES1_HUMAN | 1 | 0 | 0 | 0 | 1 | 0 | 0 | 0 | 0 | Primary | nuc           |
| NRF1_HUMAN  | 0 | 1 | 0 | 0 | 0 | 0 | 0 | 1 | 0 | Primary | nuc           |
| NT5C_HUMAN  | 0 | 0 | 0 | 1 | 1 | 0 | 0 | 0 | 0 | Primary | cyt           |
| NUA4L_HUMAN | 1 | 0 | 0 | 0 | 0 | 1 | 0 | 0 | 0 | Primary |               |
| NUBP2_HUMAN | 0 | 0 | 0 | 1 | 0 | 1 | 0 | 0 | 0 | Primary |               |
| OMA1_HUMAN  | 0 | 0 | 0 | 0 | 1 | 0 | 0 | 0 | 1 | Primary |               |
| P53_HUMAN   | 0 | 0 | 1 | 1 | 0 | 0 | 0 | 0 | 0 | Primary | end, cyt, nuc |
| PAG15_HUMAN | 0 | 0 | 1 | 0 | 1 | 0 | 0 | 0 | 0 | Primary |               |
| PANK1_HUMAN | 0 | 0 | 0 | 1 | 0 | 1 | 0 | 0 | 0 | Primary | cyt           |
| PAPD1_HUMAN | 0 | 0 | 1 | 0 | 1 | 0 | 0 | 0 | 0 | Primary | cyt, mit      |
| PDC6L_HUMAN | 0 | 0 | 0 | 0 | 0 | 1 | 0 | 0 | 1 | Primary | cyt, cen, ske |
| PDIA3_HUMAN | 0 | 0 | 0 | 0 | 0 | 0 | 1 | 0 | 1 | Primary |               |
| PEBP1_HUMAN | 0 | 0 | 0 | 0 | 0 | 0 | 1 | 0 | 1 | Primary |               |
| PEPL_HUMAN  | 1 | 0 | 1 | 0 | 0 | 0 | 0 | 0 | 0 | Primary |               |
| PERM_HUMAN  | 0 | 0 | 0 | 1 | 0 | 0 | 1 | 0 | 0 | Primary | lys           |
| PGK2_HUMAN  | 0 | 0 | 0 | 0 | 0 | 1 | 1 | 0 | 0 | Primary |               |
| PHIPL_HUMAN | 0 | 0 | 1 | 0 | 1 | 0 | 0 | 0 | 0 | Primary |               |
| PHLP1_HUMAN | 0 | 0 | 1 | 0 | 0 | 0 | 0 | 0 | 1 | Primary | cyt, nuc      |
| PHS2_HUMAN  | 0 | 0 | 0 | 1 | 1 | 0 | 0 | 0 | 0 | Primary |               |
| PI4KB_HUMAN | 0 | 0 | 1 | 0 | 0 | 0 | 0 | 1 | 0 | Primary | end, omm, mit |
| PIF1_HUMAN  | 1 | 0 | 0 | 0 | 0 | 0 | 0 | 0 | 1 | Primary | nuc           |
| PLD6_HUMAN  | 0 | 0 | 0 | 1 | 0 | 1 | 0 | 0 | 0 | Primary |               |
| PPME1_HUMAN | 0 | 0 | 0 | 0 | 0 | 1 | 0 | 0 | 1 | Primary |               |
| PRP6_HUMAN  | 0 | 1 | 0 | 0 | 0 | 0 | 1 | 0 | 0 | Primary | nuc           |
| PSA_HUMAN   | 0 | 0 | 1 | 0 | 0 | 0 | 0 | 0 | 1 | Primary |               |
| PSTK_HUMAN  | 0 | 0 | 0 | 1 | 1 | 0 | 0 | 0 | 0 | Primary |               |
| PTOR1_HUMAN | 1 | 0 | 0 | 0 | 0 | 1 | 0 | 0 | 0 | Primary |               |
| PTOR2_HUMAN | 1 | 0 | 0 | 0 | 1 | 0 | 0 | 0 | 0 | Primary |               |
| PTPS_HUMAN  | 0 | 0 | 1 | 0 | 1 | 0 | 0 | 0 | 0 | Primary |               |
| PUR8_HUMAN  | 0 | 0 | 0 | 1 | 1 | 0 | 0 | 0 | 0 | Primary |               |

|             |   |   |   |   |   |   |   |   |   |         |                    |
|-------------|---|---|---|---|---|---|---|---|---|---------|--------------------|
| RAB17_HUMAN | 0 | 0 | 0 | 1 | 0 | 1 | 0 | 0 | 0 | Primary |                    |
| RAB1B_HUMAN | 0 | 0 | 0 | 0 | 1 | 0 | 1 | 0 | 0 | Primary | cyt                |
| RAB8B_HUMAN | 0 | 0 | 0 | 0 | 1 | 0 | 0 | 0 | 1 | Primary |                    |
| RAF1_HUMAN  | 0 | 0 | 0 | 1 | 0 | 1 | 0 | 0 | 0 | Primary |                    |
| RASH_HUMAN  | 0 | 0 | 1 | 0 | 0 | 0 | 0 | 0 | 1 | Primary | gol, cyt, mem      |
| RB11B_HUMAN | 0 | 0 | 0 | 0 | 1 | 0 | 1 | 0 | 0 | Primary |                    |
| RBFAL_HUMAN | 1 | 0 | 0 | 0 | 0 | 1 | 0 | 0 | 0 | Primary |                    |
| RDH13_HUMAN | 0 | 0 | 0 | 0 | 1 | 0 | 1 | 0 | 0 | Primary |                    |
| RFA2_HUMAN  | 0 | 0 | 0 | 0 | 0 | 0 | 1 | 0 | 1 | Primary | nuc                |
| RL10A_HUMAN | 0 | 0 | 0 | 0 | 1 | 0 | 0 | 0 | 1 | Primary |                    |
| RL11_HUMAN  | 0 | 0 | 0 | 1 | 0 | 1 | 0 | 0 | 0 | Primary |                    |
| RL12_HUMAN  | 0 | 0 | 0 | 1 | 0 | 1 | 0 | 0 | 0 | Primary |                    |
| RL3_HUMAN   | 0 | 0 | 0 | 1 | 0 | 1 | 0 | 0 | 0 | Primary | cyt                |
| RL34_HUMAN  | 1 | 0 | 0 | 0 | 1 | 0 | 0 | 0 | 0 | Primary |                    |
| RM52_HUMAN  | 0 | 0 | 1 | 0 | 1 | 0 | 0 | 0 | 0 | Primary |                    |
| RMD3_HUMAN  | 1 | 0 | 0 | 0 | 1 | 0 | 0 | 0 | 0 | Primary | cyt, mit, ske, nuc |
| RPGF3_HUMAN | 1 | 0 | 1 | 0 | 0 | 0 | 0 | 0 | 0 | Primary |                    |
| RS16_HUMAN  | 0 | 0 | 0 | 1 | 0 | 1 | 0 | 0 | 0 | Primary |                    |
| RS23_HUMAN  | 0 | 0 | 0 | 1 | 0 | 1 | 0 | 0 | 0 | Primary |                    |
| RSSA_HUMAN  | 0 | 0 | 0 | 0 | 0 | 1 | 0 | 0 | 1 | Primary |                    |
| RTN4_HUMAN  | 0 | 1 | 0 | 0 | 0 | 0 | 0 | 1 | 0 | Primary | end                |
| RUSD3_HUMAN | 0 | 0 | 0 | 1 | 0 | 1 | 0 | 0 | 0 | Primary |                    |
| S12A1_HUMAN | 0 | 0 | 0 | 1 | 0 | 1 | 0 | 0 | 0 | Primary |                    |
| S12A4_HUMAN | 1 | 0 | 0 | 1 | 0 | 0 | 0 | 0 | 0 | Primary |                    |
| S22A4_HUMAN | 0 | 0 | 0 | 0 | 1 | 1 | 0 | 0 | 0 | Primary |                    |
| S27A2_HUMAN | 0 | 0 | 0 | 0 | 0 | 1 | 1 | 0 | 0 | Primary | end, per           |
| S35E3_HUMAN | 1 | 0 | 0 | 0 | 0 | 0 | 0 | 1 | 0 | Primary |                    |
| S7A13_HUMAN | 0 | 0 | 0 | 1 | 0 | 1 | 0 | 0 | 0 | Primary |                    |
| SAP_HUMAN   | 0 | 0 | 0 | 1 | 0 | 1 | 0 | 0 | 0 | Primary | lys                |
| SC11C_HUMAN | 0 | 0 | 0 | 1 | 0 | 1 | 0 | 0 | 0 | Primary |                    |
| SCLY_HUMAN  | 1 | 0 | 0 | 0 | 0 | 0 | 0 | 1 | 0 | Primary |                    |
| SEBP2_HUMAN | 0 | 0 | 1 | 0 | 1 | 0 | 0 | 0 | 0 | Primary |                    |
| SGTA_HUMAN  | 0 | 0 | 0 | 1 | 0 | 1 | 0 | 0 | 0 | Primary |                    |
| SMC7L_HUMAN | 0 | 0 | 1 | 0 | 1 | 0 | 0 | 0 | 0 | Primary |                    |
| SPRE_HUMAN  | 0 | 0 | 0 | 0 | 1 | 0 | 1 | 0 | 0 | Primary | cyt                |
| SPTC3_HUMAN | 0 | 0 | 0 | 1 | 0 | 1 | 0 | 0 | 0 | Primary |                    |
| STAR7_HUMAN | 0 | 0 | 0 | 1 | 0 | 1 | 0 | 0 | 0 | Primary |                    |
| STAT3_HUMAN | 0 | 0 | 1 | 0 | 0 | 0 | 0 | 0 | 1 | Primary | cyt, nuc           |
| STML3_HUMAN | 0 | 0 | 0 | 1 | 0 | 1 | 0 | 0 | 0 | Primary |                    |
| STOM_HUMAN  | 0 | 0 | 0 | 1 | 0 | 1 | 0 | 0 | 0 | Primary | cyt, mem           |
| SYCM_HUMAN  | 0 | 0 | 0 | 1 | 1 | 0 | 0 | 0 | 0 | Primary |                    |
| SYDC_HUMAN  | 0 | 0 | 0 | 1 | 0 | 1 | 0 | 0 | 0 | Primary | cyt                |
| SYEP_HUMAN  | 0 | 0 | 0 | 1 | 0 | 1 | 0 | 0 | 0 | Primary |                    |
| SYMC_HUMAN  | 0 | 0 | 0 | 0 | 1 | 0 | 0 | 0 | 1 | Primary |                    |
| SYVC_HUMAN  | 0 | 0 | 0 | 0 | 0 | 1 | 0 | 0 | 1 | Primary |                    |
| SYWC_HUMAN  | 0 | 0 | 0 | 1 | 0 | 1 | 0 | 0 | 0 | Primary | cyt                |
| TAZ_HUMAN   | 0 | 0 | 1 | 0 | 0 | 0 | 0 | 0 | 1 | Primary |                    |
| TCPA_HUMAN  | 0 | 0 | 0 | 1 | 0 | 1 | 0 | 0 | 0 | Primary | cyt                |
| TCPB_HUMAN  | 0 | 0 | 0 | 1 | 0 | 1 | 0 | 0 | 0 | Primary | cyt                |
| TCPD_HUMAN  | 0 | 0 | 0 | 1 | 0 | 1 | 0 | 0 | 0 | Primary | cyt                |
| TCPE_HUMAN  | 0 | 0 | 0 | 1 | 0 | 1 | 0 | 0 | 0 | Primary | cyt                |
| TCPG_HUMAN  | 0 | 0 | 0 | 1 | 0 | 1 | 0 | 0 | 0 | Primary | cyt                |
| TCPW_HUMAN  | 0 | 0 | 0 | 1 | 0 | 1 | 0 | 0 | 0 | Primary | cyt                |
| TCPZ_HUMAN  | 0 | 0 | 0 | 1 | 0 | 1 | 0 | 0 | 0 | Primary | cyt                |
| TERT_HUMAN  | 0 | 0 | 1 | 0 | 0 | 1 | 0 | 0 | 0 | Primary | nuc                |
| TGDS_HUMAN  | 0 | 0 | 0 | 1 | 0 | 1 | 0 | 0 | 0 | Primary |                    |
| THEM4_HUMAN | 0 | 0 | 0 | 0 | 1 | 0 | 0 | 0 | 1 | Primary | cyt, mem           |
| THG1_HUMAN  | 0 | 0 | 1 | 0 | 1 | 0 | 0 | 0 | 0 | Primary | cyt, nuc           |
| THIC_HUMAN  | 0 | 0 | 0 | 0 | 1 | 1 | 0 | 0 | 0 | Primary | cyt                |
| THNS1_HUMAN | 0 | 0 | 0 | 1 | 0 | 1 | 0 | 0 | 0 | Primary |                    |
| THOP1_HUMAN | 0 | 0 | 0 | 0 | 0 | 1 | 0 | 0 | 1 | Primary | cyt                |
| TM147_HUMAN | 0 | 0 | 0 | 1 | 0 | 1 | 0 | 0 | 0 | Primary |                    |
| TM186_HUMAN | 0 | 0 | 1 | 0 | 1 | 0 | 0 | 0 | 0 | Primary |                    |
| TMEDA_HUMAN | 0 | 0 | 0 | 0 | 0 | 1 | 1 | 0 | 0 | Primary |                    |
| TMM65_HUMAN | 0 | 0 | 0 | 0 | 1 | 0 | 1 | 0 | 0 | Primary |                    |
| TPH2_HUMAN  | 0 | 0 | 0 | 1 | 0 | 1 | 0 | 0 | 0 | Primary |                    |
| TRM1L_HUMAN | 1 | 0 | 0 | 0 | 0 | 1 | 0 | 0 | 0 | Primary |                    |
| TRUB1_HUMAN | 1 | 0 | 0 | 0 | 0 | 0 | 0 | 0 | 1 | Primary |                    |
| TRY3_HUMAN  | 0 | 0 | 0 | 0 | 0 | 1 | 1 | 0 | 0 | Primary | ext                |
| TSH3_HUMAN  | 0 | 0 | 1 | 0 | 1 | 0 | 0 | 0 | 0 | Primary |                    |
| TTC13_HUMAN | 1 | 0 | 0 | 0 | 0 | 1 | 0 | 0 | 0 | Primary |                    |
| TUSC2_HUMAN | 0 | 0 | 0 | 1 | 0 | 1 | 0 | 0 | 0 | Primary |                    |
| TUT7_HUMAN  | 0 | 0 | 0 | 1 | 0 | 1 | 0 | 0 | 0 | Primary |                    |
| TYSD1_HUMAN | 1 | 0 | 0 | 0 | 0 | 1 | 0 | 0 | 0 | Primary |                    |
| UACA_HUMAN  | 0 | 0 | 0 | 0 | 0 | 1 | 0 | 0 | 1 | Primary | cyt, ske, nuc      |
| UCRIL_HUMAN | 1 | 0 | 0 | 1 | 0 | 0 | 0 | 0 | 0 | Primary |                    |
| VA0D1_HUMAN | 1 | 0 | 0 | 0 | 0 | 0 | 0 | 0 | 1 | Primary |                    |
| VATA_HUMAN  | 0 | 0 | 0 | 0 | 0 | 1 | 0 | 0 | 1 | Primary |                    |
| VATB2_HUMAN | 1 | 0 | 0 | 0 | 0 | 0 | 0 | 0 | 1 | Primary |                    |
| VATC1_HUMAN | 1 | 0 | 0 | 0 | 0 | 0 | 0 | 0 | 1 | Primary |                    |
| VATD_HUMAN  | 1 | 0 | 0 | 0 | 0 | 0 | 0 | 0 | 1 | Primary |                    |
| VATF_HUMAN  | 1 | 0 | 0 | 0 | 0 | 0 | 0 | 0 | 1 | Primary |                    |
| VATG3_HUMAN | 1 | 0 | 0 | 0 | 0 | 0 | 0 | 0 | 1 | Primary |                    |
| VATH_HUMAN  | 1 | 0 | 0 | 0 | 0 | 0 | 0 | 0 | 1 | Primary |                    |
| VATL_HUMAN  | 1 | 0 | 0 | 0 | 0 | 0 | 0 | 0 | 1 | Primary |                    |
| VATO_HUMAN  | 1 | 0 | 0 | 0 | 0 | 0 | 0 | 0 | 1 | Primary |                    |
| WVOX_HUMAN  | 0 | 0 | 1 | 0 | 0 | 1 | 0 | 0 | 0 | Primary | gol, cyt, mit, nuc |

|             |   |   |   |   |   |   |   |   |   |           |          |
|-------------|---|---|---|---|---|---|---|---|---|-----------|----------|
| XPR1_HUMAN  | 0 | 0 | 0 | 0 | 0 | 0 | 1 | 0 | 1 | Primary   |          |
| YK019_HUMAN | 1 | 0 | 0 | 0 | 0 | 0 | 0 | 1 | 0 | Primary   |          |
| ZADH2_HUMAN | 0 | 0 | 0 | 1 | 1 | 0 | 0 | 0 | 0 | Primary   |          |
| ZNT9_HUMAN  | 0 | 0 | 0 | 1 | 0 | 1 | 0 | 0 | 0 | Primary   |          |
| A1AT_HUMAN  | 0 | 0 | 0 | 0 | 0 | 0 | 1 | 0 | 0 | Secondary | ext      |
| A2MG_HUMAN  | 0 | 0 | 0 | 0 | 0 | 1 | 0 | 0 | 0 | Secondary | ext      |
| AACS_HUMAN  | 1 | 0 | 0 | 0 | 0 | 0 | 0 | 0 | 0 | Secondary |          |
| AAPK2_HUMAN | 0 | 0 | 0 | 0 | 0 | 0 | 0 | 0 | 1 | Secondary |          |
| ABCD4_HUMAN | 1 | 0 | 0 | 0 | 0 | 0 | 0 | 0 | 0 | Secondary | per      |
| ABL1_HUMAN  | 0 | 0 | 1 | 0 | 0 | 0 | 0 | 0 | 0 | Secondary | nuc      |
| ACOC_HUMAN  | 0 | 0 | 0 | 0 | 1 | 0 | 0 | 0 | 0 | Secondary | cyt      |
| ACOD_HUMAN  | 0 | 0 | 1 | 0 | 0 | 0 | 0 | 0 | 0 | Secondary |          |
| ACOT8_HUMAN | 0 | 0 | 0 | 0 | 0 | 1 | 0 | 0 | 0 | Secondary | per      |
| ACOX2_HUMAN | 1 | 0 | 0 | 0 | 0 | 0 | 0 | 0 | 0 | Secondary | per      |
| ACOX3_HUMAN | 0 | 0 | 0 | 0 | 1 | 0 | 0 | 0 | 0 | Secondary |          |
| ACTA_HUMAN  | 0 | 0 | 0 | 0 | 0 | 0 | 1 | 0 | 0 | Secondary | cyt, ske |
| ACY2_HUMAN  | 0 | 0 | 1 | 0 | 0 | 0 | 0 | 0 | 0 | Secondary |          |
| ACYP2_HUMAN | 0 | 0 | 0 | 0 | 1 | 0 | 0 | 0 | 0 | Secondary |          |
| ADHX_HUMAN  | 0 | 0 | 0 | 0 | 0 | 0 | 0 | 0 | 1 | Secondary | cyt      |
| ADPPT_HUMAN | 1 | 0 | 0 | 0 | 0 | 0 | 0 | 0 | 0 | Secondary | cyt      |
| AICDA_HUMAN | 1 | 0 | 0 | 0 | 0 | 0 | 0 | 0 | 0 | Secondary |          |
| AK1A1_HUMAN | 0 | 0 | 1 | 0 | 0 | 0 | 0 | 0 | 0 | Secondary |          |
| AK1C3_HUMAN | 0 | 0 | 0 | 0 | 0 | 1 | 0 | 0 | 0 | Secondary | cyt      |
| AL3A1_HUMAN | 0 | 0 | 0 | 0 | 0 | 0 | 0 | 0 | 1 | Secondary | cyt      |
| AL3B1_HUMAN | 0 | 0 | 0 | 0 | 0 | 0 | 1 | 0 | 0 | Secondary |          |
| ALBU_HUMAN  | 0 | 0 | 0 | 0 | 0 | 0 | 1 | 0 | 0 | Secondary | ext      |
| ALDOA_HUMAN | 0 | 0 | 0 | 0 | 0 | 0 | 1 | 0 | 0 | Secondary |          |
| ALDR_HUMAN  | 0 | 0 | 0 | 0 | 0 | 0 | 1 | 0 | 0 | Secondary | cyt      |
| AMRP_HUMAN  | 0 | 0 | 0 | 0 | 0 | 0 | 0 | 0 | 1 | Secondary | end, cyt |
| ANM1_HUMAN  | 0 | 0 | 0 | 0 | 0 | 0 | 0 | 0 | 1 | Secondary | nuc      |
| ANXA2_HUMAN | 0 | 0 | 0 | 0 | 0 | 0 | 1 | 0 | 0 | Secondary | ext      |
| ANXA5_HUMAN | 0 | 0 | 0 | 0 | 0 | 0 | 1 | 0 | 0 | Secondary |          |
| AP4A_HUMAN  | 0 | 0 | 0 | 0 | 1 | 0 | 0 | 0 | 0 | Secondary |          |
| APEX1_HUMAN | 0 | 0 | 1 | 0 | 0 | 0 | 0 | 0 | 0 | Secondary | nuc      |
| APOA1_HUMAN | 0 | 0 | 0 | 0 | 0 | 0 | 1 | 0 | 0 | Secondary | ext      |
| ARAP2_HUMAN | 0 | 0 | 0 | 0 | 0 | 0 | 0 | 0 | 1 | Secondary |          |
| ASSY_HUMAN  | 0 | 0 | 0 | 0 | 0 | 1 | 0 | 0 | 0 | Secondary |          |
| AT2A2_HUMAN | 0 | 0 | 0 | 0 | 0 | 0 | 1 | 0 | 0 | Secondary | end      |
| ATOX1_HUMAN | 0 | 0 | 0 | 0 | 0 | 0 | 0 | 0 | 1 | Secondary |          |
| ATR_HUMAN   | 0 | 0 | 0 | 0 | 0 | 0 | 0 | 0 | 1 | Secondary | nuc      |
| B2L11_HUMAN | 0 | 0 | 1 | 0 | 0 | 0 | 0 | 0 | 0 | Secondary | mit      |
| B2LA1_HUMAN | 0 | 0 | 1 | 0 | 0 | 0 | 0 | 0 | 0 | Secondary | cyt      |
| BAAT_HUMAN  | 0 | 0 | 1 | 0 | 0 | 0 | 0 | 0 | 0 | Secondary | cyt      |
| BAK_HUMAN   | 0 | 0 | 0 | 0 | 1 | 0 | 0 | 0 | 0 | Secondary |          |
| BASI_HUMAN  | 0 | 0 | 0 | 0 | 0 | 0 | 1 | 0 | 0 | Secondary |          |
| BCCIP_HUMAN | 0 | 0 | 0 | 0 | 0 | 0 | 0 | 0 | 1 | Secondary | nuc      |
| BCDO2_HUMAN | 0 | 0 | 0 | 0 | 0 | 0 | 1 | 0 | 0 | Secondary |          |
| BDNF_HUMAN  | 0 | 0 | 0 | 0 | 0 | 0 | 0 | 0 | 1 | Secondary | ext      |
| BIG1_HUMAN  | 0 | 0 | 0 | 0 | 0 | 0 | 0 | 0 | 1 | Secondary |          |
| BIN3_HUMAN  | 0 | 0 | 1 | 0 | 0 | 0 | 0 | 0 | 0 | Secondary | cyt, ske |
| BLK_HUMAN   | 0 | 0 | 1 | 0 | 0 | 0 | 0 | 0 | 0 | Secondary |          |
| BLMH_HUMAN  | 0 | 0 | 0 | 0 | 0 | 0 | 0 | 0 | 1 | Secondary | cyt      |
| BMF_HUMAN   | 0 | 0 | 1 | 0 | 0 | 0 | 0 | 0 | 0 | Secondary |          |
| BNC1_HUMAN  | 0 | 0 | 1 | 0 | 0 | 0 | 0 | 0 | 0 | Secondary |          |
| BODG_HUMAN  | 0 | 0 | 0 | 0 | 1 | 0 | 0 | 0 | 0 | Secondary | cyt      |
| BOK_HUMAN   | 0 | 0 | 1 | 0 | 0 | 0 | 0 | 0 | 0 | Secondary |          |
| BRCA1_HUMAN | 0 | 0 | 1 | 0 | 0 | 0 | 0 | 0 | 0 | Secondary | cyt      |
| CALX_HUMAN  | 0 | 0 | 0 | 0 | 0 | 0 | 1 | 0 | 0 | Secondary | end      |
| CASP2_HUMAN | 0 | 0 | 1 | 0 | 0 | 0 | 0 | 0 | 0 | Secondary |          |
| CASP3_HUMAN | 0 | 0 | 1 | 0 | 0 | 0 | 0 | 0 | 0 | Secondary | cyt      |
| CASP9_HUMAN | 0 | 0 | 1 | 0 | 0 | 0 | 0 | 0 | 0 | Secondary |          |
| CD59_HUMAN  | 0 | 0 | 0 | 0 | 0 | 0 | 1 | 0 | 0 | Secondary | mem      |
| CDGAP_HUMAN | 0 | 0 | 0 | 0 | 0 | 0 | 0 | 0 | 1 | Secondary |          |
| CEBPZ_HUMAN | 0 | 0 | 0 | 0 | 0 | 0 | 0 | 0 | 1 | Secondary | nuc      |
| CLH1_HUMAN  | 0 | 0 | 0 | 0 | 0 | 0 | 0 | 0 | 1 | Secondary | cyt      |
| CLN3_HUMAN  | 0 | 0 | 1 | 0 | 0 | 0 | 0 | 0 | 0 | Secondary | lys      |
| CMGA_HUMAN  | 0 | 0 | 0 | 0 | 0 | 0 | 0 | 0 | 1 | Secondary | ext      |
| CO2_HUMAN   | 0 | 0 | 0 | 0 | 0 | 0 | 0 | 0 | 1 | Secondary | ext      |
| COMT_HUMAN  | 0 | 0 | 0 | 0 | 1 | 0 | 0 | 0 | 0 | Secondary | mem, ext |
| CP17A_HUMAN | 0 | 0 | 0 | 0 | 0 | 1 | 0 | 0 | 0 | Secondary |          |
| CP1A1_HUMAN | 1 | 0 | 0 | 0 | 0 | 0 | 0 | 0 | 0 | Secondary | end, mic |
| CP2CJ_HUMAN | 0 | 0 | 0 | 0 | 0 | 1 | 0 | 0 | 0 | Secondary | end, mic |
| CP4AM_HUMAN | 0 | 0 | 0 | 0 | 0 | 1 | 0 | 0 | 0 | Secondary |          |
| CRYAB_HUMAN | 0 | 0 | 0 | 0 | 0 | 0 | 1 | 0 | 0 | Secondary |          |
| CXA9_HUMAN  | 0 | 0 | 0 | 0 | 0 | 1 | 0 | 0 | 0 | Secondary |          |
| CY24B_HUMAN | 0 | 0 | 0 | 0 | 0 | 1 | 0 | 0 | 0 | Secondary |          |
| DCE1_HUMAN  | 0 | 0 | 0 | 0 | 0 | 1 | 0 | 0 | 0 | Secondary |          |
| DCHS_HUMAN  | 0 | 0 | 0 | 0 | 0 | 0 | 1 | 0 | 0 | Secondary |          |
| DCOR_HUMAN  | 0 | 0 | 0 | 0 | 0 | 0 | 1 | 0 | 0 | Secondary |          |
| DDX23_HUMAN | 0 | 0 | 0 | 0 | 0 | 0 | 0 | 0 | 1 | Secondary | nuc      |
| DESM_HUMAN  | 0 | 0 | 0 | 0 | 0 | 0 | 1 | 0 | 0 | Secondary | cyt      |
| DHB1_HUMAN  | 0 | 0 | 0 | 0 | 0 | 0 | 0 | 0 | 1 | Secondary | cyt      |
| DHB12_HUMAN | 0 | 0 | 0 | 0 | 0 | 1 | 0 | 0 | 0 | Secondary | end      |
| DHB2_HUMAN  | 0 | 0 | 1 | 0 | 0 | 0 | 0 | 0 | 0 | Secondary |          |
| DHI1_HUMAN  | 0 | 0 | 0 | 0 | 0 | 0 | 1 | 0 | 0 | Secondary | end      |
| DHSO_HUMAN  | 0 | 0 | 0 | 0 | 0 | 0 | 0 | 0 | 1 | Secondary |          |
| DMPK_HUMAN  | 0 | 0 | 0 | 1 | 0 | 0 | 0 | 0 | 0 | Secondary |          |



|             |   |   |   |   |   |   |   |   |   |           |               |
|-------------|---|---|---|---|---|---|---|---|---|-----------|---------------|
| DNM1L_HUMAN | 0 | 0 | 0 | 0 | 0 | 0 | 0 | 0 | 1 | Secondary | cyt           |
| DPYD_HUMAN  | 0 | 0 | 0 | 0 | 0 | 0 | 0 | 0 | 1 | Secondary | cyt           |
| DYHC1_HUMAN | 0 | 0 | 1 | 0 | 0 | 0 | 0 | 0 | 0 | Secondary | cyt           |
| DYN1_HUMAN  | 0 | 0 | 1 | 0 | 0 | 0 | 0 | 0 | 0 | Secondary | cyt, ske      |
| EF1A2_HUMAN | 0 | 0 | 0 | 0 | 0 | 0 | 1 | 0 | 0 | Secondary |               |
| EF1G_HUMAN  | 0 | 0 | 0 | 0 | 0 | 0 | 0 | 0 | 1 | Secondary |               |
| ENTK_HUMAN  | 0 | 0 | 0 | 0 | 0 | 1 | 0 | 0 | 0 | Secondary |               |
| ERF1_HUMAN  | 0 | 0 | 1 | 0 | 0 | 0 | 0 | 0 | 0 | Secondary | cyt           |
| EZRI_HUMAN  | 0 | 0 | 0 | 0 | 0 | 0 | 1 | 0 | 0 | Secondary | cyt, mem      |
| F262_HUMAN  | 0 | 0 | 1 | 0 | 0 | 0 | 0 | 0 | 0 | Secondary |               |
| FABP4_HUMAN | 0 | 0 | 0 | 0 | 0 | 0 | 1 | 0 | 0 | Secondary | cyt, nuc      |
| FHIT_HUMAN  | 0 | 0 | 0 | 0 | 0 | 0 | 0 | 0 | 1 | Secondary | cyt           |
| FHL2_HUMAN  | 0 | 0 | 1 | 0 | 0 | 0 | 0 | 0 | 0 | Secondary | cyt, nuc      |
| FKB1A_HUMAN | 0 | 0 | 0 | 0 | 0 | 0 | 1 | 0 | 0 | Secondary | cyt           |
| FNBP2_HUMAN | 0 | 0 | 0 | 0 | 0 | 1 | 0 | 0 | 0 | Secondary |               |
| FPPS_HUMAN  | 0 | 0 | 0 | 0 | 1 | 0 | 0 | 0 | 0 | Secondary | cyt           |
| FRIH_HUMAN  | 0 | 0 | 0 | 0 | 1 | 0 | 0 | 0 | 0 | Secondary |               |
| GCH1_HUMAN  | 0 | 0 | 0 | 1 | 0 | 0 | 0 | 0 | 0 | Secondary | cyt, nuc      |
| GCR_HUMAN   | 0 | 0 | 1 | 0 | 0 | 0 | 0 | 0 | 0 | Secondary | nuc           |
| GDIB_HUMAN  | 0 | 0 | 0 | 0 | 0 | 0 | 1 | 0 | 0 | Secondary |               |
| GDIR2_HUMAN | 0 | 0 | 0 | 0 | 0 | 0 | 1 | 0 | 0 | Secondary | cyt           |
| GLRX1_HUMAN | 0 | 0 | 0 | 0 | 1 | 0 | 0 | 0 | 0 | Secondary | cyt           |
| GNA12_HUMAN | 0 | 0 | 0 | 0 | 0 | 0 | 1 | 0 | 0 | Secondary |               |
| GNSD_HUMAN  | 0 | 0 | 0 | 0 | 0 | 1 | 0 | 0 | 0 | Secondary |               |
| GOGB1_HUMAN | 0 | 0 | 0 | 0 | 0 | 0 | 0 | 0 | 1 | Secondary | gol           |
| GPSM1_HUMAN | 0 | 0 | 0 | 0 | 0 | 1 | 0 | 0 | 0 | Secondary | gol, end, cyt |
| GRB10_HUMAN | 0 | 0 | 1 | 0 | 0 | 0 | 0 | 0 | 0 | Secondary |               |
| GRIK2_HUMAN | 0 | 0 | 0 | 0 | 0 | 1 | 0 | 0 | 0 | Secondary | mem           |
| GSTA4_HUMAN | 0 | 0 | 1 | 0 | 0 | 0 | 0 | 0 | 0 | Secondary | cyt           |
| GTR1_HUMAN  | 0 | 0 | 0 | 0 | 0 | 0 | 0 | 0 | 1 | Secondary |               |
| GTR4_HUMAN  | 0 | 0 | 0 | 0 | 0 | 0 | 0 | 0 | 1 | Secondary | cyt, nuc      |
| HACL1_HUMAN | 0 | 0 | 0 | 0 | 0 | 0 | 0 | 0 | 1 | Secondary | per           |
| HAP1_HUMAN  | 0 | 0 | 1 | 0 | 0 | 0 | 0 | 0 | 0 | Secondary |               |
| HBD_HUMAN   | 0 | 0 | 0 | 0 | 0 | 1 | 0 | 0 | 0 | Secondary |               |
| HELC1_HUMAN | 0 | 0 | 0 | 0 | 0 | 0 | 0 | 0 | 1 | Secondary | cyt           |
| HEM4_HUMAN  | 0 | 0 | 0 | 0 | 0 | 0 | 1 | 0 | 0 | Secondary |               |
| HINFP_HUMAN | 0 | 0 | 0 | 0 | 0 | 0 | 0 | 0 | 1 | Secondary | nuc           |
| HIRA_HUMAN  | 0 | 0 | 0 | 0 | 0 | 0 | 0 | 0 | 1 | Secondary | nuc           |
| HMDH_HUMAN  | 0 | 0 | 0 | 0 | 0 | 0 | 0 | 0 | 1 | Secondary | end, per      |
| HNRPK_HUMAN | 0 | 0 | 1 | 0 | 0 | 0 | 0 | 0 | 0 | Secondary | cyt, nuc      |
| HS90A_HUMAN | 0 | 0 | 0 | 0 | 0 | 1 | 0 | 0 | 0 | Secondary | cyt           |
| HSP72_HUMAN | 0 | 0 | 0 | 0 | 0 | 1 | 0 | 0 | 0 | Secondary |               |
| HSP7C_HUMAN | 0 | 0 | 0 | 0 | 0 | 0 | 1 | 0 | 0 | Secondary | cyt           |
| HXK3_HUMAN  | 0 | 0 | 0 | 0 | 1 | 0 | 0 | 0 | 0 | Secondary |               |
| IKBA_HUMAN  | 0 | 0 | 1 | 0 | 0 | 0 | 0 | 0 | 0 | Secondary | cyt, nuc      |
| IMPA1_HUMAN | 0 | 0 | 0 | 0 | 0 | 1 | 0 | 0 | 0 | Secondary | cyt           |
| INMT_HUMAN  | 0 | 0 | 1 | 0 | 0 | 0 | 0 | 0 | 0 | Secondary |               |
| IRAK1_HUMAN | 0 | 0 | 1 | 0 | 0 | 0 | 0 | 0 | 0 | Secondary |               |
| IRK11_HUMAN | 0 | 0 | 1 | 0 | 0 | 0 | 0 | 0 | 0 | Secondary |               |
| IRK8_HUMAN  | 0 | 0 | 1 | 0 | 0 | 0 | 0 | 0 | 0 | Secondary |               |
| ITB1_HUMAN  | 0 | 0 | 0 | 0 | 0 | 0 | 1 | 0 | 0 | Secondary |               |
| JAM1_HUMAN  | 0 | 0 | 0 | 0 | 0 | 1 | 0 | 0 | 0 | Secondary | mem           |
| K1C18_HUMAN | 0 | 0 | 0 | 0 | 0 | 1 | 0 | 0 | 0 | Secondary | mem           |
| K2C8_HUMAN  | 0 | 0 | 1 | 0 | 0 | 0 | 0 | 0 | 0 | Secondary | cyt, nuc      |
| K6PF_HUMAN  | 0 | 0 | 0 | 0 | 0 | 0 | 1 | 0 | 0 | Secondary | cyt           |
| KAP3_HUMAN  | 0 | 0 | 0 | 0 | 0 | 1 | 0 | 0 | 0 | Secondary |               |
| KAPCA_HUMAN | 0 | 0 | 0 | 0 | 0 | 1 | 0 | 0 | 0 | Secondary |               |
| KCRM_HUMAN  | 0 | 0 | 0 | 0 | 0 | 0 | 1 | 0 | 0 | Secondary | cyt           |
| KGUA_HUMAN  | 0 | 0 | 1 | 0 | 0 | 0 | 0 | 0 | 0 | Secondary |               |
| KPCA_HUMAN  | 0 | 0 | 0 | 0 | 0 | 1 | 0 | 0 | 0 | Secondary |               |
| KPCD_HUMAN  | 0 | 0 | 1 | 0 | 0 | 0 | 0 | 0 | 0 | Secondary |               |
| KPCD1_HUMAN | 0 | 0 | 1 | 0 | 0 | 0 | 0 | 0 | 0 | Secondary | cyt, mem      |
| KU70_HUMAN  | 0 | 0 | 0 | 0 | 0 | 1 | 0 | 0 | 0 | Secondary | nuc           |
| KYNU_HUMAN  | 0 | 0 | 0 | 0 | 1 | 0 | 0 | 0 | 0 | Secondary | cyt           |
| LAMA4_HUMAN | 0 | 0 | 0 | 0 | 0 | 0 | 0 | 0 | 1 | Secondary | ext           |
| LDH6A_HUMAN | 0 | 0 | 0 | 0 | 0 | 1 | 0 | 0 | 0 | Secondary | cyt           |
| LDHC_HUMAN  | 0 | 0 | 0 | 0 | 0 | 1 | 0 | 0 | 0 | Secondary | cyt           |
| LMNA_HUMAN  | 0 | 0 | 0 | 0 | 0 | 0 | 1 | 0 | 0 | Secondary | nuc           |
| LOXL4_HUMAN | 0 | 0 | 0 | 0 | 0 | 0 | 0 | 0 | 1 | Secondary |               |
| LX15B_HUMAN | 0 | 0 | 1 | 0 | 0 | 0 | 0 | 0 | 0 | Secondary |               |
| MAT2B_HUMAN | 0 | 0 | 0 | 0 | 1 | 0 | 0 | 0 | 0 | Secondary |               |
| MERL_HUMAN  | 1 | 0 | 0 | 0 | 0 | 0 | 0 | 0 | 0 | Secondary | cyt, nuc      |
| MGST3_HUMAN | 0 | 0 | 0 | 0 | 0 | 0 | 1 | 0 | 0 | Secondary |               |
| MK09_HUMAN  | 0 | 0 | 0 | 1 | 0 | 0 | 0 | 0 | 0 | Secondary |               |
| MLH1_HUMAN  | 0 | 0 | 0 | 0 | 0 | 0 | 0 | 0 | 1 | Secondary | nuc           |
| MSH3_HUMAN  | 0 | 0 | 0 | 0 | 0 | 0 | 0 | 0 | 1 | Secondary |               |
| MTHR_HUMAN  | 0 | 0 | 0 | 0 | 0 | 0 | 0 | 0 | 1 | Secondary |               |
| MYH7_HUMAN  | 0 | 0 | 0 | 0 | 0 | 0 | 1 | 0 | 0 | Secondary | cyt, ske      |
| MYH9_HUMAN  | 0 | 0 | 0 | 0 | 0 | 0 | 0 | 0 | 1 | Secondary |               |
| MYPC3_HUMAN | 0 | 0 | 0 | 0 | 0 | 0 | 1 | 0 | 0 | Secondary |               |
| NAC2_HUMAN  | 0 | 0 | 0 | 0 | 0 | 0 | 0 | 0 | 1 | Secondary |               |
| NCBP1_HUMAN | 0 | 0 | 0 | 0 | 0 | 0 | 0 | 0 | 1 | Secondary | cyt, nuc      |
| NCOR2_HUMAN | 0 | 0 | 0 | 0 | 0 | 0 | 0 | 0 | 1 | Secondary | nuc           |
| NDK6_HUMAN  | 0 | 0 | 0 | 0 | 1 | 0 | 0 | 0 | 0 | Secondary |               |
| NDKA_HUMAN  | 0 | 0 | 0 | 0 | 1 | 0 | 0 | 0 | 0 | Secondary | cyt, nuc      |
| NEIL2_HUMAN | 0 | 0 | 1 | 0 | 0 | 0 | 0 | 0 | 0 | Secondary | nuc           |
| NEP1_HUMAN  | 0 | 0 | 0 | 0 | 0 | 0 | 0 | 0 | 1 | Secondary | nuc           |

|             |   |   |   |   |   |   |   |   |   |           |                    |
|-------------|---|---|---|---|---|---|---|---|---|-----------|--------------------|
| NF1_HUMAN   | 0 | 0 | 0 | 0 | 0 | 0 | 0 | 0 | 1 | Secondary |                    |
| NFKB1_HUMAN | 0 | 0 | 1 | 0 | 0 | 0 | 0 | 0 | 0 | Secondary | cyt, nuc           |
| NMNA3_HUMAN | 0 | 0 | 1 | 0 | 0 | 0 | 0 | 0 | 0 | Secondary | mit                |
| NMT1_HUMAN  | 0 | 0 | 0 | 0 | 0 | 0 | 0 | 0 | 1 | Secondary | cyt                |
| NOL3_HUMAN  | 0 | 0 | 0 | 0 | 0 | 1 | 0 | 0 | 0 | Secondary | cyt                |
| NOX1_HUMAN  | 0 | 0 | 0 | 0 | 0 | 0 | 0 | 0 | 1 | Secondary |                    |
| NQO1_HUMAN  | 0 | 0 | 1 | 0 | 0 | 0 | 0 | 0 | 0 | Secondary | cyt                |
| NR4A1_HUMAN | 0 | 0 | 1 | 0 | 0 | 0 | 0 | 0 | 0 | Secondary | nuc                |
| NUD12_HUMAN | 0 | 0 | 0 | 0 | 0 | 1 | 0 | 0 | 0 | Secondary | per                |
| NUD18_HUMAN | 1 | 0 | 0 | 0 | 0 | 0 | 0 | 0 | 0 | Secondary |                    |
| NUDT5_HUMAN | 0 | 0 | 0 | 0 | 0 | 0 | 0 | 0 | 1 | Secondary |                    |
| OLA1_HUMAN  | 0 | 0 | 0 | 0 | 0 | 0 | 0 | 0 | 1 | Secondary |                    |
| PA24A_HUMAN | 0 | 0 | 0 | 0 | 0 | 0 | 1 | 0 | 0 | Secondary | cyt                |
| PCKGC_HUMAN | 0 | 1 | 0 | 0 | 0 | 0 | 0 | 0 | 0 | Secondary | cyt                |
| PDIA1_HUMAN | 0 | 0 | 0 | 0 | 0 | 0 | 1 | 0 | 0 | Secondary | end                |
| PERP_HUMAN  | 0 | 0 | 0 | 0 | 0 | 1 | 0 | 0 | 0 | Secondary |                    |
| PERT_HUMAN  | 0 | 0 | 0 | 0 | 0 | 0 | 1 | 0 | 0 | Secondary |                    |
| PEX5R_HUMAN | 0 | 0 | 0 | 0 | 0 | 0 | 0 | 0 | 1 | Secondary |                    |
| PGAM2_HUMAN | 0 | 0 | 0 | 0 | 0 | 0 | 1 | 0 | 0 | Secondary |                    |
| PGK1_HUMAN  | 0 | 0 | 0 | 0 | 0 | 0 | 1 | 0 | 0 | Secondary | cyt                |
| PGM2_HUMAN  | 0 | 0 | 0 | 0 | 0 | 0 | 0 | 0 | 1 | Secondary |                    |
| PICK1_HUMAN | 0 | 0 | 0 | 0 | 0 | 1 | 0 | 0 | 0 | Secondary | cyt, nuc           |
| PK3C3_HUMAN | 0 | 0 | 0 | 0 | 0 | 0 | 1 | 0 | 0 | Secondary |                    |
| PKD2_HUMAN  | 0 | 0 | 0 | 0 | 0 | 0 | 0 | 0 | 1 | Secondary |                    |
| PLCA_HUMAN  | 1 | 0 | 0 | 0 | 0 | 0 | 0 | 0 | 0 | Secondary |                    |
| PLCB_HUMAN  | 1 | 0 | 0 | 0 | 0 | 0 | 0 | 0 | 0 | Secondary |                    |
| PLCC_HUMAN  | 1 | 0 | 0 | 0 | 0 | 0 | 0 | 0 | 0 | Secondary |                    |
| PLS1_HUMAN  | 0 | 0 | 0 | 0 | 0 | 0 | 0 | 0 | 1 | Secondary |                    |
| PMS2_HUMAN  | 0 | 0 | 0 | 0 | 0 | 0 | 0 | 0 | 1 | Secondary | nuc                |
| PP1G_HUMAN  | 0 | 0 | 0 | 0 | 0 | 1 | 0 | 0 | 0 | Secondary | cyt, nuc           |
| PP2AA_HUMAN | 0 | 0 | 0 | 0 | 0 | 1 | 0 | 0 | 0 | Secondary | cyt, cen, ske, nuc |
| PPCE_HUMAN  | 0 | 0 | 1 | 0 | 0 | 0 | 0 | 0 | 0 | Secondary | cyt                |
| PPGB_HUMAN  | 0 | 0 | 0 | 0 | 0 | 1 | 0 | 0 | 0 | Secondary | lys                |
| PPID_HUMAN  | 0 | 0 | 0 | 0 | 0 | 0 | 0 | 0 | 1 | Secondary | cyt                |
| PPLA_HUMAN  | 0 | 0 | 0 | 0 | 0 | 0 | 1 | 0 | 0 | Secondary |                    |
| PRDX4_HUMAN | 0 | 0 | 0 | 0 | 0 | 1 | 0 | 0 | 0 | Secondary | cyt                |
| PROSC_HUMAN | 0 | 0 | 0 | 0 | 1 | 0 | 0 | 0 | 0 | Secondary |                    |
| PRS6A_HUMAN | 0 | 0 | 0 | 0 | 0 | 1 | 0 | 0 | 0 | Secondary |                    |
| PSN1_HUMAN  | 0 | 0 | 0 | 0 | 0 | 1 | 0 | 0 | 0 | Secondary | gol, end           |
| PTGES_HUMAN | 1 | 0 | 0 | 0 | 0 | 0 | 0 | 0 | 0 | Secondary |                    |
| PTN21_HUMAN | 0 | 0 | 1 | 0 | 0 | 0 | 0 | 0 | 0 | Secondary |                    |
| PTSS2_HUMAN | 0 | 0 | 1 | 0 | 0 | 0 | 0 | 0 | 0 | Secondary |                    |
| PUR2_HUMAN  | 0 | 0 | 0 | 1 | 0 | 0 | 0 | 0 | 0 | Secondary |                    |
| PYRG1_HUMAN | 0 | 0 | 0 | 0 | 0 | 0 | 0 | 0 | 1 | Secondary |                    |
| PYRG2_HUMAN | 0 | 0 | 0 | 0 | 1 | 0 | 0 | 0 | 0 | Secondary |                    |
| QORX_HUMAN  | 0 | 0 | 0 | 0 | 0 | 0 | 0 | 0 | 1 | Secondary |                    |
| RAD50_HUMAN | 0 | 0 | 0 | 0 | 0 | 0 | 0 | 0 | 1 | Secondary | nuc                |
| RASK_HUMAN  | 0 | 0 | 1 | 0 | 0 | 0 | 0 | 0 | 0 | Secondary | cyt, mem           |
| RB11A_HUMAN | 0 | 0 | 0 | 0 | 1 | 0 | 0 | 0 | 0 | Secondary | mem                |
| RBM12_HUMAN | 0 | 0 | 1 | 0 | 0 | 0 | 0 | 0 | 0 | Secondary | nuc                |
| RHG01_HUMAN | 0 | 0 | 0 | 0 | 0 | 0 | 1 | 0 | 0 | Secondary | cyt                |
| RHG08_HUMAN | 1 | 0 | 0 | 0 | 0 | 0 | 0 | 0 | 0 | Secondary |                    |
| RIR1_HUMAN  | 0 | 0 | 0 | 0 | 0 | 0 | 0 | 0 | 1 | Secondary | cyt                |
| RIR2_HUMAN  | 0 | 0 | 0 | 0 | 0 | 0 | 0 | 0 | 1 | Secondary | cyt                |
| RL27A_HUMAN | 0 | 0 | 0 | 0 | 0 | 0 | 0 | 0 | 1 | Secondary |                    |
| RL35A_HUMAN | 0 | 0 | 0 | 0 | 1 | 0 | 0 | 0 | 0 | Secondary |                    |
| RL5_HUMAN   | 0 | 0 | 0 | 0 | 0 | 1 | 0 | 0 | 0 | Secondary | cyt, nuc           |
| RL9_HUMAN   | 0 | 0 | 0 | 0 | 0 | 0 | 0 | 0 | 1 | Secondary |                    |
| RNZ2_HUMAN  | 0 | 0 | 0 | 0 | 1 | 0 | 0 | 0 | 0 | Secondary |                    |
| RPC8_HUMAN  | 0 | 0 | 0 | 0 | 0 | 1 | 0 | 0 | 0 | Secondary | nuc                |
| RPE_HUMAN   | 0 | 0 | 0 | 0 | 0 | 0 | 0 | 0 | 1 | Secondary |                    |
| RS15_HUMAN  | 0 | 0 | 0 | 0 | 0 | 0 | 0 | 0 | 1 | Secondary |                    |
| RS15A_HUMAN | 0 | 0 | 0 | 0 | 1 | 0 | 0 | 0 | 0 | Secondary |                    |
| RS18_HUMAN  | 0 | 0 | 0 | 0 | 0 | 0 | 0 | 0 | 1 | Secondary | cyt                |
| RS2_HUMAN   | 0 | 0 | 0 | 1 | 0 | 0 | 0 | 0 | 0 | Secondary |                    |
| RS20_HUMAN  | 0 | 0 | 0 | 0 | 0 | 0 | 0 | 0 | 1 | Secondary |                    |
| RS24_HUMAN  | 0 | 0 | 0 | 0 | 0 | 0 | 0 | 0 | 1 | Secondary |                    |
| RS3A_HUMAN  | 0 | 1 | 0 | 0 | 0 | 0 | 0 | 0 | 0 | Secondary |                    |
| RS5_HUMAN   | 0 | 0 | 0 | 0 | 0 | 0 | 0 | 0 | 1 | Secondary |                    |
| S27A3_HUMAN | 0 | 0 | 0 | 0 | 0 | 1 | 0 | 0 | 0 | Secondary |                    |
| S40A1_HUMAN | 0 | 0 | 0 | 0 | 0 | 1 | 0 | 0 | 0 | Secondary | mem                |
| SAP3_HUMAN  | 0 | 0 | 0 | 0 | 0 | 1 | 0 | 0 | 0 | Secondary | lys                |
| SDHL_HUMAN  | 0 | 0 | 0 | 1 | 0 | 0 | 0 | 0 | 0 | Secondary | cyt                |
| SEC20_HUMAN | 0 | 0 | 0 | 0 | 0 | 0 | 1 | 0 | 0 | Secondary | end                |
| SELO_HUMAN  | 0 | 0 | 0 | 0 | 0 | 0 | 0 | 0 | 1 | Secondary |                    |
| SIAS_HUMAN  | 0 | 0 | 0 | 0 | 0 | 1 | 0 | 0 | 0 | Secondary |                    |
| SIVA_HUMAN  | 0 | 0 | 1 | 0 | 0 | 0 | 0 | 0 | 0 | Secondary | cyt, nuc           |
| SLC31_HUMAN | 0 | 0 | 0 | 0 | 0 | 1 | 0 | 0 | 0 | Secondary |                    |
| SPNS1_HUMAN | 0 | 0 | 1 | 0 | 0 | 0 | 0 | 0 | 0 | Secondary | imm, mit           |
| SPTA2_HUMAN | 0 | 0 | 0 | 0 | 0 | 0 | 1 | 0 | 0 | Secondary | cyt, ske           |
| SPTB2_HUMAN | 0 | 0 | 0 | 0 | 0 | 0 | 0 | 0 | 1 | Secondary |                    |
| SPTC2_HUMAN | 0 | 0 | 0 | 0 | 1 | 0 | 0 | 0 | 0 | Secondary |                    |
| STIP1_HUMAN | 0 | 0 | 0 | 0 | 0 | 0 | 1 | 0 | 0 | Secondary |                    |
| SYFB_HUMAN  | 0 | 0 | 0 | 0 | 0 | 0 | 0 | 0 | 1 | Secondary |                    |
| SYHC_HUMAN  | 0 | 0 | 0 | 0 | 0 | 0 | 0 | 0 | 1 | Secondary | cyt                |
| SYLC_HUMAN  | 0 | 0 | 0 | 0 | 0 | 0 | 0 | 0 | 1 | Secondary |                    |
| SYNJ2_HUMAN | 0 | 0 | 1 | 0 | 0 | 0 | 0 | 0 | 0 | Secondary |                    |

|             |   |   |   |   |   |   |   |   |   |           |               |
|-------------|---|---|---|---|---|---|---|---|---|-----------|---------------|
| SYRC_HUMAN  | 0 | 0 | 0 | 0 | 1 | 0 | 0 | 0 | 0 | Secondary | cyt           |
| TAP1_HUMAN  | 0 | 0 | 0 | 0 | 1 | 0 | 0 | 0 | 0 | Secondary | end           |
| TBA1B_HUMAN | 0 | 0 | 1 | 0 | 0 | 0 | 0 | 0 | 0 | Secondary |               |
| TBB5_HUMAN  | 0 | 0 | 0 | 0 | 0 | 0 | 1 | 0 | 0 | Secondary |               |
| TERA_HUMAN  | 0 | 0 | 0 | 0 | 0 | 0 | 1 | 0 | 0 | Secondary | cyt, nuc      |
| THNS2_HUMAN | 0 | 0 | 0 | 0 | 0 | 0 | 0 | 0 | 1 | Secondary |               |
| TKT_HUMAN   | 1 | 0 | 0 | 0 | 0 | 0 | 0 | 0 | 0 | Secondary |               |
| TKTL2_HUMAN | 1 | 0 | 0 | 0 | 0 | 0 | 0 | 0 | 0 | Secondary |               |
| TMM11_HUMAN | 0 | 0 | 0 | 0 | 1 | 0 | 0 | 0 | 0 | Secondary |               |
| TNF11_HUMAN | 0 | 0 | 0 | 0 | 0 | 0 | 0 | 0 | 1 | Secondary |               |
| TOP2B_HUMAN | 0 | 0 | 0 | 0 | 0 | 0 | 0 | 0 | 1 | Secondary | cyt, nuc      |
| TPIS_HUMAN  | 0 | 0 | 0 | 0 | 0 | 0 | 1 | 0 | 0 | Secondary |               |
| TPP1_HUMAN  | 0 | 0 | 0 | 0 | 0 | 1 | 0 | 0 | 0 | Secondary | lys           |
| TRIO_HUMAN  | 0 | 0 | 0 | 0 | 0 | 0 | 0 | 0 | 1 | Secondary |               |
| TRXR1_HUMAN | 0 | 0 | 0 | 0 | 1 | 0 | 0 | 0 | 0 | Secondary | cyt           |
| TTHY_HUMAN  | 0 | 0 | 0 | 0 | 0 | 1 | 0 | 0 | 0 | Secondary | cyt, ext      |
| TXND3_HUMAN | 0 | 0 | 1 | 0 | 0 | 0 | 0 | 0 | 0 | Secondary | cyt           |
| TYSY_HUMAN  | 0 | 0 | 1 | 0 | 0 | 0 | 0 | 0 | 0 | Secondary |               |
| UBE3A_HUMAN | 0 | 0 | 0 | 0 | 0 | 1 | 0 | 0 | 0 | Secondary |               |
| UBIQ_HUMAN  | 0 | 0 | 0 | 0 | 0 | 0 | 1 | 0 | 0 | Secondary | cyt, nuc      |
| UBQL1_HUMAN | 0 | 0 | 0 | 0 | 0 | 1 | 0 | 0 | 0 | Secondary | cyt, nuc      |
| UDB17_HUMAN | 0 | 0 | 0 | 0 | 0 | 1 | 0 | 0 | 0 | Secondary |               |
| VA0D2_HUMAN | 1 | 0 | 0 | 0 | 0 | 0 | 0 | 0 | 0 | Secondary |               |
| VATB1_HUMAN | 1 | 0 | 0 | 0 | 0 | 0 | 0 | 0 | 0 | Secondary |               |
| VATE2_HUMAN | 1 | 0 | 0 | 0 | 0 | 0 | 0 | 0 | 0 | Secondary |               |
| VATG1_HUMAN | 1 | 0 | 0 | 0 | 0 | 0 | 0 | 0 | 0 | Secondary |               |
| VHL_HUMAN   | 0 | 0 | 1 | 0 | 0 | 0 | 0 | 0 | 0 | Secondary | cyt, nuc      |
| VIME_HUMAN  | 0 | 0 | 0 | 0 | 0 | 0 | 1 | 0 | 0 | Secondary |               |
| VPP1_HUMAN  | 0 | 0 | 0 | 0 | 0 | 0 | 0 | 0 | 1 | Secondary | cyt           |
| VPP2_HUMAN  | 1 | 0 | 0 | 0 | 0 | 0 | 0 | 0 | 0 | Secondary | mem           |
| VPP3_HUMAN  | 0 | 0 | 0 | 0 | 1 | 0 | 0 | 0 | 0 | Secondary |               |
| WASF1_HUMAN | 0 | 0 | 0 | 0 | 0 | 1 | 0 | 0 | 0 | Secondary | cyt, ske      |
| WDR3_HUMAN  | 0 | 0 | 0 | 0 | 0 | 1 | 0 | 0 | 0 | Secondary | nuc           |
| 1A1L1_HUMAN | 1 | 0 | 0 | 0 | 0 | 0 | 0 | 0 | 0 | -         |               |
| 1A1L2_HUMAN | 1 | 0 | 0 | 0 | 0 | 0 | 0 | 0 | 0 | -         |               |
| 3BP5L_HUMAN | 1 | 0 | 0 | 0 | 0 | 0 | 0 | 0 | 0 | -         |               |
| A16A1_HUMAN | 1 | 0 | 0 | 0 | 0 | 0 | 0 | 0 | 0 | -         |               |
| AACT_HUMAN  | 0 | 0 | 0 | 0 | 0 | 0 | 1 | 0 | 0 | -         | ext           |
| ABCA4_HUMAN | 0 | 0 | 0 | 0 | 0 | 1 | 0 | 0 | 0 | -         |               |
| ABCA8_HUMAN | 0 | 0 | 0 | 0 | 0 | 1 | 0 | 0 | 0 | -         |               |
| ABCA9_HUMAN | 0 | 0 | 0 | 0 | 1 | 0 | 0 | 0 | 0 | -         |               |
| ABCAC_HUMAN | 0 | 0 | 0 | 0 | 0 | 1 | 0 | 0 | 0 | -         |               |
| ABCB5_HUMAN | 0 | 0 | 0 | 0 | 0 | 0 | 0 | 1 | 0 | -         | mem           |
| ABCCB_HUMAN | 0 | 0 | 0 | 0 | 0 | 0 | 0 | 0 | 1 | -         |               |
| ABCF1_HUMAN | 0 | 0 | 0 | 0 | 0 | 0 | 0 | 0 | 1 | -         |               |
| ABCG2_HUMAN | 0 | 0 | 0 | 0 | 0 | 0 | 0 | 0 | 1 | -         | mem           |
| ABHD1_HUMAN | 0 | 0 | 0 | 0 | 0 | 0 | 0 | 0 | 1 | -         |               |
| ABHD4_HUMAN | 1 | 0 | 0 | 0 | 0 | 0 | 0 | 0 | 0 | -         |               |
| ACATN_HUMAN | 1 | 0 | 0 | 0 | 0 | 0 | 0 | 0 | 0 | -         |               |
| ACOT1_HUMAN | 1 | 0 | 0 | 0 | 0 | 0 | 0 | 0 | 0 | -         | cyt           |
| ACOT6_HUMAN | 1 | 0 | 0 | 0 | 0 | 0 | 0 | 0 | 0 | -         | cyt           |
| ACSL6_HUMAN | 0 | 0 | 0 | 0 | 0 | 1 | 0 | 0 | 0 | -         |               |
| ACTN2_HUMAN | 0 | 0 | 0 | 0 | 0 | 0 | 1 | 0 | 0 | -         | cyt           |
| ADA30_HUMAN | 0 | 0 | 0 | 0 | 0 | 0 | 0 | 0 | 1 | -         |               |
| ADAM8_HUMAN | 0 | 0 | 0 | 0 | 0 | 0 | 0 | 0 | 1 | -         |               |
| ADNP2_HUMAN | 0 | 0 | 0 | 0 | 0 | 0 | 0 | 0 | 1 | -         |               |
| AEDO_HUMAN  | 0 | 0 | 0 | 0 | 1 | 0 | 0 | 0 | 0 | -         |               |
| AGR2_HUMAN  | 0 | 0 | 0 | 0 | 1 | 0 | 0 | 0 | 0 | -         |               |
| AHSA1_HUMAN | 0 | 0 | 0 | 0 | 0 | 0 | 0 | 0 | 1 | -         | end, cyt      |
| AK1C1_HUMAN | 0 | 0 | 0 | 0 | 0 | 1 | 0 | 0 | 0 | -         | cyt           |
| AK1C2_HUMAN | 0 | 0 | 0 | 0 | 0 | 1 | 0 | 0 | 0 | -         |               |
| AK1C4_HUMAN | 0 | 0 | 0 | 0 | 0 | 1 | 0 | 0 | 0 | -         | cyt           |
| AKD2_HUMAN  | 1 | 0 | 0 | 0 | 0 | 0 | 0 | 0 | 0 | -         |               |
| AL1A1_HUMAN | 0 | 0 | 0 | 0 | 0 | 1 | 0 | 0 | 0 | -         | cyt           |
| AL3B2_HUMAN | 0 | 0 | 0 | 0 | 0 | 0 | 1 | 0 | 0 | -         |               |
| ALG14_HUMAN | 0 | 0 | 0 | 0 | 0 | 1 | 0 | 0 | 0 | -         |               |
| ALO17_HUMAN | 0 | 0 | 0 | 0 | 0 | 1 | 0 | 0 | 0 | -         |               |
| AN18B_HUMAN | 0 | 0 | 0 | 0 | 0 | 0 | 0 | 0 | 1 | -         |               |
| ANK36_HUMAN | 0 | 0 | 0 | 0 | 0 | 1 | 0 | 0 | 0 | -         |               |
| ANKR2_HUMAN | 0 | 0 | 0 | 0 | 0 | 0 | 1 | 0 | 0 | -         |               |
| ANR26_HUMAN | 0 | 0 | 0 | 0 | 1 | 0 | 0 | 0 | 0 | -         |               |
| ANR32_HUMAN | 0 | 0 | 0 | 0 | 0 | 0 | 0 | 0 | 1 | -         |               |
| ANS1A_HUMAN | 0 | 0 | 0 | 0 | 0 | 0 | 0 | 0 | 1 | -         | cyt           |
| ANX11_HUMAN | 0 | 0 | 0 | 0 | 0 | 0 | 1 | 0 | 0 | -         | cyt, nuc      |
| ANXA1_HUMAN | 0 | 0 | 0 | 0 | 0 | 0 | 1 | 0 | 0 | -         |               |
| ANXA3_HUMAN | 0 | 0 | 0 | 0 | 0 | 0 | 1 | 0 | 0 | -         |               |
| ANXA6_HUMAN | 0 | 0 | 0 | 0 | 0 | 0 | 1 | 0 | 0 | -         |               |
| ANXA8_HUMAN | 0 | 0 | 0 | 0 | 0 | 1 | 0 | 0 | 0 | -         |               |
| AP1S1_HUMAN | 0 | 0 | 0 | 0 | 0 | 1 | 0 | 0 | 0 | -         | gol, cyt      |
| AP1S3_HUMAN | 0 | 0 | 0 | 0 | 0 | 1 | 0 | 0 | 0 | -         | gol, cyt      |
| AP2M1_HUMAN | 0 | 0 | 0 | 0 | 0 | 1 | 0 | 0 | 0 | -         | cyt, mem      |
| AP3B1_HUMAN | 0 | 0 | 0 | 0 | 0 | 0 | 0 | 0 | 1 | -         | gol, cyt      |
| APBB1_HUMAN | 0 | 0 | 0 | 0 | 0 | 1 | 0 | 0 | 0 | -         | cyt, mem, nuc |
| APC10_HUMAN | 0 | 0 | 0 | 0 | 0 | 0 | 0 | 0 | 1 | -         |               |
| APOH_HUMAN  | 0 | 0 | 0 | 0 | 0 | 0 | 1 | 0 | 0 | -         | ext           |
| APTX_HUMAN  | 1 | 0 | 0 | 0 | 0 | 0 | 0 | 0 | 0 | -         | nuc           |
| ARC1A_HUMAN | 0 | 0 | 0 | 0 | 0 | 1 | 0 | 0 | 0 | -         |               |



|             |   |   |   |   |   |   |   |   |   |   |               |
|-------------|---|---|---|---|---|---|---|---|---|---|---------------|
| CG023_HUMAN | 0 | 0 | 1 | 0 | 0 | 0 | 0 | 0 | 0 | - |               |
| CGNL1_HUMAN | 0 | 0 | 0 | 0 | 0 | 0 | 0 | 0 | 1 | - |               |
| CH038_HUMAN | 0 | 0 | 0 | 0 | 1 | 0 | 0 | 0 | 0 | - |               |
| CH082_HUMAN | 0 | 0 | 0 | 0 | 1 | 0 | 0 | 0 | 0 | - |               |
| CHCH1_HUMAN | 0 | 0 | 0 | 0 | 1 | 0 | 0 | 0 | 0 | - | nuc           |
| CHCH5_HUMAN | 0 | 0 | 0 | 1 | 0 | 0 | 0 | 0 | 0 | - |               |
| CHCH8_HUMAN | 0 | 0 | 0 | 0 | 0 | 0 | 0 | 0 | 1 | - |               |
| CHKB_HUMAN  | 0 | 0 | 1 | 0 | 0 | 0 | 0 | 0 | 0 | - |               |
| CI091_HUMAN | 0 | 0 | 0 | 0 | 0 | 1 | 0 | 0 | 0 | - |               |
| CI093_HUMAN | 0 | 0 | 0 | 0 | 0 | 0 | 0 | 0 | 1 | - |               |
| CI098_HUMAN | 1 | 0 | 0 | 0 | 0 | 0 | 0 | 0 | 0 | - |               |
| CI102_HUMAN | 1 | 0 | 0 | 0 | 0 | 0 | 0 | 0 | 0 | - |               |
| CI125_HUMAN | 0 | 0 | 0 | 0 | 0 | 1 | 0 | 0 | 0 | - |               |
| CI164_HUMAN | 0 | 0 | 0 | 0 | 0 | 1 | 0 | 0 | 0 | - |               |
| CIDEA_HUMAN | 0 | 0 | 0 | 0 | 0 | 1 | 0 | 0 | 0 | - |               |
| CIDEB_HUMAN | 0 | 0 | 1 | 0 | 0 | 0 | 0 | 0 | 0 | - |               |
| CISD3_HUMAN | 0 | 0 | 0 | 1 | 0 | 0 | 0 | 0 | 0 | - | mit           |
| CJ058_HUMAN | 0 | 0 | 0 | 0 | 1 | 0 | 0 | 0 | 0 | - |               |
| CJ062_HUMAN | 1 | 0 | 0 | 0 | 0 | 0 | 0 | 0 | 0 | - |               |
| CJ067_HUMAN | 0 | 0 | 0 | 0 | 0 | 1 | 0 | 0 | 0 | - |               |
| CJ071_HUMAN | 0 | 0 | 0 | 0 | 0 | 1 | 0 | 0 | 0 | - |               |
| CJ118_HUMAN | 0 | 0 | 0 | 0 | 0 | 0 | 0 | 0 | 1 | - |               |
| CK057_HUMAN | 0 | 0 | 0 | 0 | 0 | 0 | 0 | 0 | 1 | - |               |
| CK5P2_HUMAN | 0 | 0 | 0 | 0 | 0 | 0 | 0 | 0 | 1 | - | cyt, cen, ske |
| CKAP2_HUMAN | 0 | 0 | 0 | 0 | 0 | 0 | 0 | 0 | 1 | - | cyt, ske      |
| CKAP4_HUMAN | 0 | 0 | 0 | 0 | 0 | 0 | 1 | 0 | 0 | - |               |
| CL034_HUMAN | 0 | 0 | 0 | 0 | 0 | 1 | 0 | 0 | 0 | - |               |
| CL062_HUMAN | 0 | 0 | 0 | 0 | 1 | 0 | 0 | 0 | 0 | - |               |
| CL064_HUMAN | 0 | 0 | 0 | 0 | 0 | 1 | 0 | 0 | 0 | - |               |
| CLAT_HUMAN  | 0 | 0 | 0 | 0 | 1 | 0 | 0 | 0 | 0 | - |               |
| CLCC1_HUMAN | 0 | 0 | 0 | 0 | 0 | 1 | 0 | 0 | 0 | - |               |
| CLIC1_HUMAN | 0 | 0 | 0 | 0 | 0 | 0 | 1 | 0 | 0 | - |               |
| CLIP1_HUMAN | 0 | 0 | 0 | 0 | 0 | 0 | 0 | 0 | 1 | - | cyt, ske      |
| CM039_HUMAN | 0 | 0 | 0 | 0 | 0 | 0 | 0 | 0 | 1 | - |               |
| CMA1_HUMAN  | 0 | 0 | 0 | 0 | 0 | 0 | 1 | 0 | 0 | - | cyt, ext      |
| CMTD1_HUMAN | 0 | 0 | 0 | 0 | 1 | 0 | 0 | 0 | 0 | - |               |
| CN057_HUMAN | 0 | 0 | 0 | 0 | 0 | 1 | 0 | 0 | 0 | - |               |
| CN174_HUMAN | 0 | 0 | 0 | 0 | 0 | 1 | 0 | 0 | 0 | - |               |
| CNO6L_HUMAN | 0 | 0 | 0 | 0 | 0 | 0 | 0 | 0 | 1 | - | cyt           |
| CNTLN_HUMAN | 0 | 0 | 0 | 0 | 0 | 0 | 0 | 0 | 1 | - | cyt, cen, ske |
| CO002_HUMAN | 0 | 0 | 0 | 0 | 0 | 0 | 0 | 0 | 1 | - |               |
| CO041_HUMAN | 0 | 0 | 0 | 0 | 0 | 1 | 0 | 0 | 0 | - |               |
| CO052_HUMAN | 0 | 0 | 0 | 0 | 0 | 1 | 0 | 0 | 0 | - |               |
| CO061_HUMAN | 0 | 0 | 0 | 1 | 0 | 0 | 0 | 0 | 0 | - |               |
| CO6A1_HUMAN | 0 | 0 | 0 | 0 | 0 | 0 | 1 | 0 | 0 | - |               |
| COF2_HUMAN  | 0 | 0 | 0 | 0 | 0 | 0 | 1 | 0 | 0 | - |               |
| COJA1_HUMAN | 0 | 0 | 0 | 0 | 0 | 0 | 0 | 0 | 1 | - |               |
| COLA1_HUMAN | 0 | 0 | 0 | 0 | 0 | 1 | 0 | 0 | 0 | - | cyt, ext      |
| COX19_HUMAN | 0 | 0 | 0 | 0 | 0 | 0 | 0 | 0 | 1 | - | cyt           |
| COXAM_HUMAN | 0 | 0 | 0 | 0 | 1 | 0 | 0 | 0 | 0 | - | mit           |
| CP007_HUMAN | 0 | 0 | 0 | 0 | 0 | 0 | 1 | 0 | 0 | - |               |
| CP4X1_HUMAN | 0 | 0 | 0 | 0 | 0 | 0 | 0 | 0 | 1 | - |               |
| CPN2_HUMAN  | 0 | 0 | 0 | 0 | 0 | 1 | 0 | 0 | 0 | - | ext           |
| CPNE4_HUMAN | 0 | 0 | 0 | 0 | 0 | 1 | 0 | 0 | 0 | - |               |
| CPNE7_HUMAN | 0 | 0 | 0 | 0 | 0 | 1 | 0 | 0 | 0 | - |               |
| CPXM1_HUMAN | 0 | 0 | 0 | 0 | 0 | 1 | 0 | 0 | 0 | - |               |
| CQ039_HUMAN | 0 | 0 | 0 | 0 | 0 | 0 | 0 | 0 | 1 | - |               |
| CQ049_HUMAN | 0 | 0 | 0 | 0 | 0 | 1 | 0 | 0 | 0 | - |               |
| CQ089_HUMAN | 0 | 0 | 0 | 0 | 1 | 0 | 0 | 0 | 0 | - |               |
| CRBN_HUMAN  | 0 | 0 | 0 | 0 | 0 | 0 | 0 | 1 | 0 | - |               |
| CS031_HUMAN | 0 | 0 | 0 | 0 | 0 | 1 | 0 | 0 | 0 | - |               |
| CSTF1_HUMAN | 0 | 0 | 0 | 0 | 0 | 0 | 0 | 0 | 1 | - | nuc           |
| CSTF3_HUMAN | 0 | 0 | 0 | 0 | 0 | 0 | 0 | 0 | 1 | - | nuc           |
| CT024_HUMAN | 0 | 0 | 0 | 0 | 1 | 0 | 0 | 0 | 0 | - |               |
| CT108_HUMAN | 0 | 0 | 0 | 0 | 0 | 0 | 0 | 0 | 1 | - |               |
| CT118_HUMAN | 0 | 0 | 0 | 1 | 0 | 0 | 0 | 0 | 0 | - |               |
| CTGE6_HUMAN | 0 | 0 | 0 | 0 | 0 | 1 | 0 | 0 | 0 | - |               |
| CTR4_HUMAN  | 0 | 0 | 0 | 0 | 0 | 1 | 0 | 0 | 0 | - |               |
| CTTB2_HUMAN | 0 | 0 | 0 | 0 | 0 | 0 | 0 | 0 | 1 | - |               |
| CU002_HUMAN | 0 | 0 | 1 | 0 | 0 | 0 | 0 | 0 | 0 | - |               |
| CU129_HUMAN | 0 | 0 | 0 | 0 | 0 | 1 | 0 | 0 | 0 | - |               |
| CUL7_HUMAN  | 0 | 0 | 0 | 0 | 0 | 1 | 0 | 0 | 0 | - | cyt           |
| CX04A_HUMAN | 1 | 0 | 0 | 0 | 0 | 0 | 0 | 0 | 0 | - |               |
| CX04B_HUMAN | 1 | 0 | 0 | 0 | 0 | 0 | 0 | 0 | 0 | - |               |
| CXCL2_HUMAN | 0 | 0 | 0 | 0 | 0 | 1 | 0 | 0 | 0 | - | ext           |
| CXG3_HUMAN  | 0 | 0 | 0 | 0 | 0 | 1 | 0 | 0 | 0 | - |               |
| CY24A_HUMAN | 0 | 0 | 0 | 0 | 0 | 1 | 0 | 0 | 0 | - |               |
| CY561_HUMAN | 0 | 0 | 1 | 0 | 0 | 0 | 0 | 0 | 0 | - |               |
| CYCL_HUMAN  | 1 | 0 | 0 | 0 | 0 | 0 | 0 | 0 | 0 | - |               |
| D19L1_HUMAN | 0 | 0 | 0 | 0 | 0 | 0 | 1 | 0 | 0 | - |               |
| DACT2_HUMAN | 0 | 0 | 0 | 0 | 1 | 0 | 0 | 0 | 0 | - |               |
| DAZP1_HUMAN | 0 | 0 | 0 | 0 | 0 | 1 | 0 | 0 | 0 | - |               |
| DCAKD_HUMAN | 0 | 0 | 0 | 0 | 1 | 0 | 0 | 0 | 0 | - |               |
| DCPS_HUMAN  | 0 | 0 | 0 | 0 | 0 | 0 | 0 | 0 | 1 | - | cyt, nuc      |
| DD19A_HUMAN | 0 | 0 | 0 | 0 | 0 | 0 | 0 | 0 | 1 | - |               |
| DDHD1_HUMAN | 0 | 0 | 0 | 0 | 0 | 0 | 0 | 0 | 1 | - | cyt           |
| DDX12_HUMAN | 0 | 0 | 0 | 0 | 0 | 0 | 0 | 0 | 1 | - |               |

|             |   |   |   |   |   |   |   |   |   |   |               |
|-------------|---|---|---|---|---|---|---|---|---|---|---------------|
| DDX31_HUMAN | 0 | 0 | 0 | 0 | 0 | 0 | 0 | 0 | 1 | - | nuc           |
| DESP_HUMAN  | 0 | 0 | 0 | 0 | 0 | 1 | 0 | 0 | 0 | - | cyt, ske      |
| DGAT2_HUMAN | 0 | 0 | 0 | 0 | 0 | 0 | 0 | 1 | 0 | - | end           |
| DHB13_HUMAN | 0 | 0 | 0 | 0 | 0 | 0 | 0 | 0 | 1 | - |               |
| DI3L2_HUMAN | 0 | 0 | 0 | 0 | 0 | 0 | 0 | 0 | 1 | - |               |
| DIRA3_HUMAN | 0 | 0 | 0 | 0 | 0 | 1 | 0 | 0 | 0 | - |               |
| DIRC1_HUMAN | 0 | 0 | 0 | 0 | 0 | 1 | 0 | 0 | 0 | - |               |
| DJC27_HUMAN | 0 | 0 | 0 | 0 | 1 | 0 | 0 | 0 | 0 | - |               |
| DLGP4_HUMAN | 0 | 0 | 0 | 0 | 0 | 0 | 0 | 0 | 1 | - |               |
| DMXL1_HUMAN | 0 | 0 | 0 | 0 | 0 | 0 | 0 | 0 | 1 | - |               |
| DNJB6_HUMAN | 0 | 0 | 0 | 0 | 0 | 1 | 0 | 0 | 0 | - | cyt, nuc      |
| DNJC4_HUMAN | 0 | 0 | 0 | 0 | 1 | 0 | 0 | 0 | 0 | - |               |
| DNL11_HUMAN | 0 | 0 | 0 | 0 | 0 | 0 | 0 | 0 | 1 | - | nuc           |
| DNL13_HUMAN | 0 | 0 | 1 | 0 | 0 | 0 | 0 | 0 | 0 | - | nuc           |
| DNLZ_HUMAN  | 0 | 0 | 0 | 0 | 0 | 0 | 0 | 0 | 1 | - |               |
| DOC11_HUMAN | 0 | 0 | 0 | 0 | 0 | 0 | 0 | 0 | 1 | - |               |
| DOM3Z_HUMAN | 0 | 0 | 0 | 0 | 0 | 1 | 0 | 0 | 0 | - |               |
| DOP1_HUMAN  | 0 | 0 | 0 | 0 | 0 | 0 | 0 | 0 | 1 | - |               |
| DPM1_HUMAN  | 0 | 0 | 0 | 0 | 0 | 0 | 0 | 0 | 1 | - | end           |
| DPOLN_HUMAN | 0 | 0 | 0 | 1 | 0 | 0 | 0 | 0 | 0 | - | nuc           |
| DQX1_HUMAN  | 0 | 0 | 0 | 0 | 0 | 1 | 0 | 0 | 0 | - |               |
| DRS7B_HUMAN | 0 | 0 | 0 | 0 | 0 | 0 | 0 | 0 | 1 | - |               |
| DSPP_HUMAN  | 0 | 0 | 0 | 0 | 0 | 0 | 0 | 0 | 1 | - | ext           |
| DUS1L_HUMAN | 0 | 0 | 0 | 1 | 0 | 0 | 0 | 0 | 0 | - |               |
| DUS26_HUMAN | 0 | 0 | 0 | 0 | 1 | 0 | 0 | 0 | 0 | - | gol, cyt, nuc |
| DUS2L_HUMAN | 0 | 0 | 0 | 0 | 1 | 0 | 0 | 0 | 0 | - | end, cyt      |
| DYHC2_HUMAN | 0 | 0 | 0 | 0 | 0 | 0 | 0 | 0 | 1 | - |               |
| DYN2_HUMAN  | 0 | 0 | 0 | 0 | 0 | 0 | 0 | 0 | 1 | - | cyt, mem, ske |
| EAA1_HUMAN  | 0 | 0 | 0 | 0 | 0 | 0 | 1 | 0 | 0 | - |               |
| EAA4_HUMAN  | 0 | 0 | 0 | 0 | 0 | 0 | 1 | 0 | 0 | - |               |
| ECHD1_HUMAN | 1 | 0 | 0 | 0 | 0 | 0 | 0 | 0 | 0 | - |               |
| EFC4B_HUMAN | 0 | 0 | 0 | 0 | 0 | 1 | 0 | 0 | 0 | - |               |
| EFCB2_HUMAN | 0 | 0 | 0 | 0 | 0 | 1 | 0 | 0 | 0 | - |               |
| EFR1_HUMAN  | 0 | 0 | 0 | 0 | 0 | 1 | 0 | 0 | 0 | - |               |
| EGLN3_HUMAN | 1 | 0 | 0 | 0 | 0 | 0 | 0 | 0 | 0 | - | cyt, nuc      |
| EHD2_HUMAN  | 0 | 0 | 0 | 0 | 0 | 0 | 1 | 0 | 0 | - | cyt, mem      |
| ELOA3_HUMAN | 0 | 0 | 0 | 0 | 0 | 0 | 0 | 0 | 1 | - | nuc           |
| ELOV5_HUMAN | 0 | 0 | 0 | 0 | 0 | 0 | 0 | 0 | 1 | - |               |
| ELP3_HUMAN  | 0 | 0 | 1 | 0 | 0 | 0 | 0 | 0 | 0 | - | cyt, nuc      |
| ERC2_HUMAN  | 0 | 0 | 0 | 0 | 0 | 0 | 0 | 0 | 1 | - | cyt, ske      |
| ERC6L_HUMAN | 1 | 0 | 0 | 0 | 0 | 0 | 0 | 0 | 0 | - | cen           |
| EXO1_HUMAN  | 0 | 0 | 0 | 0 | 0 | 0 | 0 | 0 | 1 | - | nuc           |
| EYS_HUMAN   | 0 | 0 | 0 | 0 | 0 | 1 | 0 | 0 | 0 | - |               |
| F135B_HUMAN | 0 | 0 | 0 | 0 | 0 | 0 | 0 | 0 | 1 | - |               |
| FA36A_HUMAN | 0 | 0 | 0 | 0 | 1 | 0 | 0 | 0 | 0 | - |               |
| FA65C_HUMAN | 0 | 0 | 0 | 0 | 1 | 0 | 0 | 0 | 0 | - |               |
| FA87B_HUMAN | 0 | 0 | 0 | 0 | 0 | 1 | 0 | 0 | 0 | - |               |
| FABPH_HUMAN | 0 | 0 | 0 | 0 | 0 | 0 | 1 | 0 | 0 | - | cyt           |
| FACD2_HUMAN | 0 | 0 | 0 | 0 | 0 | 0 | 1 | 0 | 0 | - | nuc           |
| FAKD2_HUMAN | 0 | 0 | 0 | 0 | 1 | 0 | 0 | 0 | 0 | - |               |
| FBN1_HUMAN  | 0 | 0 | 0 | 0 | 0 | 0 | 1 | 0 | 0 | - | ext           |
| FBW12_HUMAN | 0 | 0 | 0 | 0 | 0 | 0 | 0 | 0 | 1 | - |               |
| FBX3_HUMAN  | 0 | 0 | 0 | 0 | 0 | 0 | 0 | 0 | 1 | - |               |
| FBX39_HUMAN | 0 | 0 | 0 | 0 | 0 | 0 | 0 | 0 | 1 | - |               |
| FBXW7_HUMAN | 0 | 0 | 0 | 0 | 0 | 0 | 0 | 0 | 1 | - |               |
| FHL1_HUMAN  | 0 | 0 | 0 | 0 | 0 | 0 | 1 | 0 | 0 | - | cyt, nuc      |
| FHL17_HUMAN | 0 | 0 | 0 | 0 | 0 | 1 | 0 | 0 | 0 | - |               |
| FHL3_HUMAN  | 0 | 0 | 1 | 0 | 0 | 0 | 0 | 0 | 0 | - |               |
| FIG4_HUMAN  | 0 | 0 | 0 | 0 | 0 | 0 | 0 | 0 | 1 | - |               |
| FIGL1_HUMAN | 0 | 0 | 0 | 0 | 0 | 0 | 0 | 1 | 0 | - |               |
| FITM2_HUMAN | 0 | 0 | 0 | 0 | 1 | 0 | 0 | 0 | 0 | - | end           |
| FMO1_HUMAN  | 0 | 0 | 0 | 0 | 0 | 1 | 0 | 0 | 0 | - | end, mic      |
| FNIP2_HUMAN | 0 | 0 | 0 | 0 | 0 | 0 | 0 | 0 | 1 | - | cyt           |
| FOXK2_HUMAN | 0 | 0 | 0 | 0 | 0 | 1 | 0 | 0 | 0 | - |               |
| FR1L6_HUMAN | 0 | 0 | 0 | 0 | 0 | 0 | 0 | 0 | 1 | - |               |
| FRYL_HUMAN  | 0 | 0 | 0 | 0 | 0 | 1 | 0 | 0 | 0 | - |               |
| FSIP2_HUMAN | 0 | 0 | 0 | 0 | 1 | 0 | 0 | 0 | 0 | - |               |
| FUS_HUMAN   | 0 | 0 | 0 | 0 | 0 | 0 | 0 | 0 | 1 | - | nuc           |
| FYV1_HUMAN  | 0 | 0 | 0 | 0 | 0 | 0 | 0 | 0 | 1 | - |               |
| G45IP_HUMAN | 0 | 0 | 0 | 0 | 1 | 0 | 0 | 0 | 0 | - | nuc           |
| G6PT1_HUMAN | 0 | 0 | 0 | 1 | 0 | 0 | 0 | 0 | 0 | - |               |
| GALC_HUMAN  | 0 | 0 | 0 | 0 | 1 | 0 | 0 | 0 | 0 | - | lys           |
| GARL3_HUMAN | 0 | 0 | 0 | 0 | 0 | 0 | 0 | 0 | 1 | - |               |
| GATCL_HUMAN | 0 | 0 | 0 | 0 | 1 | 0 | 0 | 0 | 0 | - |               |
| GBB4_HUMAN  | 0 | 0 | 0 | 0 | 0 | 0 | 1 | 0 | 0 | - |               |
| GBG5_HUMAN  | 0 | 0 | 0 | 0 | 1 | 0 | 0 | 0 | 0 | - |               |
| GCC2_HUMAN  | 0 | 0 | 0 | 0 | 0 | 0 | 0 | 0 | 1 | - | gol, cyt      |
| GCOM1_HUMAN | 0 | 0 | 0 | 0 | 0 | 1 | 0 | 0 | 0 | - |               |
| GCP6_HUMAN  | 0 | 0 | 0 | 0 | 0 | 0 | 0 | 0 | 1 | - | cyt, cen, ske |
| GDE_HUMAN   | 1 | 0 | 0 | 0 | 0 | 0 | 0 | 0 | 0 | - |               |
| GDPD3_HUMAN | 0 | 0 | 0 | 0 | 0 | 0 | 0 | 0 | 1 | - |               |
| GGPPS_HUMAN | 0 | 0 | 0 | 0 | 0 | 0 | 0 | 0 | 1 | - | cyt           |
| GIMA1_HUMAN | 1 | 0 | 0 | 0 | 0 | 0 | 0 | 0 | 0 | - | end           |
| GIMA2_HUMAN | 1 | 0 | 0 | 0 | 0 | 0 | 0 | 0 | 0 | - |               |
| GIMA6_HUMAN | 1 | 0 | 0 | 0 | 0 | 0 | 0 | 0 | 0 | - |               |
| GIMA8_HUMAN | 1 | 0 | 0 | 0 | 0 | 0 | 0 | 0 | 0 | - |               |
| GLCTK_HUMAN | 0 | 0 | 0 | 0 | 1 | 0 | 0 | 0 | 0 | - | cyt, mit      |

|             |   |   |   |   |   |   |   |   |   |   |                    |
|-------------|---|---|---|---|---|---|---|---|---|---|--------------------|
| GLE1_HUMAN  | 0 | 0 | 0 | 0 | 0 | 0 | 0 | 0 | 1 | - | cyt, nuc           |
| GLTL6_HUMAN | 0 | 0 | 0 | 0 | 0 | 1 | 0 | 0 | 0 | - |                    |
| GLYL3_HUMAN | 0 | 0 | 0 | 0 | 0 | 1 | 0 | 0 | 0 | - |                    |
| GLYR1_HUMAN | 1 | 0 | 0 | 0 | 0 | 0 | 0 | 0 | 0 | - | nuc                |
| GNAS2_HUMAN | 0 | 0 | 0 | 1 | 0 | 0 | 0 | 0 | 0 | - |                    |
| GOGA4_HUMAN | 0 | 0 | 0 | 0 | 0 | 0 | 0 | 0 | 1 | - | gol, cyt           |
| GOLI4_HUMAN | 0 | 0 | 0 | 0 | 0 | 0 | 0 | 0 | 1 | - | gol                |
| GPAT2_HUMAN | 1 | 0 | 0 | 0 | 0 | 0 | 0 | 0 | 0 | - |                    |
| GPC5C_HUMAN | 0 | 0 | 0 | 0 | 0 | 1 | 0 | 0 | 0 | - | mem                |
| GPD1L_HUMAN | 0 | 0 | 0 | 0 | 0 | 0 | 1 | 0 | 0 | - | cyt, mem           |
| GPKOW_HUMAN | 0 | 0 | 0 | 0 | 0 | 1 | 0 | 0 | 0 | - |                    |
| GRAP_HUMAN  | 0 | 0 | 0 | 0 | 0 | 0 | 0 | 0 | 1 | - |                    |
| GRCR1_HUMAN | 1 | 0 | 0 | 0 | 0 | 0 | 0 | 0 | 0 | - |                    |
| GRK4_HUMAN  | 0 | 0 | 1 | 0 | 0 | 0 | 0 | 0 | 0 | - | cyt                |
| GRN_HUMAN   | 0 | 0 | 0 | 0 | 0 | 1 | 0 | 0 | 0 | - | ext                |
| GTR9_HUMAN  | 0 | 0 | 0 | 0 | 0 | 0 | 0 | 0 | 1 | - |                    |
| H17B6_HUMAN | 0 | 0 | 0 | 0 | 0 | 0 | 1 | 0 | 0 | - | mic                |
| H1T_HUMAN   | 0 | 0 | 0 | 0 | 0 | 0 | 1 | 0 | 0 | - | nuc                |
| H2A1D_HUMAN | 0 | 0 | 0 | 0 | 0 | 0 | 1 | 0 | 0 | - | nuc                |
| H2BFM_HUMAN | 1 | 0 | 0 | 0 | 0 | 0 | 0 | 0 | 0 | - | nuc                |
| H6ST1_HUMAN | 0 | 0 | 0 | 0 | 0 | 1 | 0 | 0 | 0 | - |                    |
| H90B2_HUMAN | 0 | 0 | 0 | 0 | 0 | 1 | 0 | 0 | 0 | - |                    |
| H90B3_HUMAN | 0 | 0 | 0 | 0 | 0 | 1 | 0 | 0 | 0 | - |                    |
| H90B4_HUMAN | 0 | 0 | 0 | 0 | 0 | 1 | 0 | 0 | 0 | - |                    |
| HBM_HUMAN   | 0 | 0 | 0 | 0 | 0 | 1 | 0 | 0 | 0 | - |                    |
| HBXIP_HUMAN | 0 | 0 | 0 | 0 | 1 | 0 | 0 | 0 | 0 | - | cyt                |
| HDDC2_HUMAN | 0 | 0 | 0 | 0 | 1 | 0 | 0 | 0 | 0 | - |                    |
| HEAT1_HUMAN | 0 | 0 | 0 | 0 | 0 | 0 | 0 | 0 | 1 | - | nuc                |
| HEBP1_HUMAN | 0 | 0 | 0 | 0 | 0 | 1 | 0 | 0 | 0 | - | cyt                |
| HECD1_HUMAN | 0 | 0 | 0 | 0 | 0 | 1 | 0 | 0 | 0 | - |                    |
| HERC2_HUMAN | 0 | 0 | 0 | 0 | 0 | 1 | 0 | 0 | 0 | - |                    |
| HEXDC_HUMAN | 0 | 0 | 0 | 0 | 0 | 1 | 0 | 0 | 0 | - |                    |
| HEX12_HUMAN | 0 | 0 | 0 | 0 | 0 | 1 | 0 | 0 | 0 | - | nuc                |
| HG2A_HUMAN  | 0 | 0 | 0 | 0 | 0 | 0 | 0 | 0 | 1 | - |                    |
| HHAT_HUMAN  | 0 | 0 | 0 | 0 | 0 | 0 | 0 | 0 | 1 | - |                    |
| HKDC1_HUMAN | 1 | 0 | 0 | 0 | 0 | 0 | 0 | 0 | 0 | - |                    |
| HMGB3_HUMAN | 0 | 0 | 0 | 0 | 0 | 0 | 0 | 0 | 1 | - |                    |
| HMGB4_HUMAN | 0 | 0 | 0 | 0 | 0 | 0 | 0 | 0 | 1 | - |                    |
| HOOK2_HUMAN | 0 | 0 | 0 | 0 | 0 | 0 | 0 | 1 | 0 | - | cyt, cen, ske      |
| HPT_HUMAN   | 0 | 0 | 0 | 0 | 0 | 1 | 0 | 0 | 0 | - | ext                |
| HPTR_HUMAN  | 0 | 0 | 0 | 0 | 0 | 1 | 0 | 0 | 0 | - |                    |
| HRC23_HUMAN | 0 | 0 | 0 | 0 | 0 | 1 | 0 | 0 | 0 | - |                    |
| HRSL2_HUMAN | 0 | 0 | 0 | 0 | 0 | 1 | 0 | 0 | 0 | - |                    |
| HS3S2_HUMAN | 0 | 0 | 0 | 0 | 0 | 1 | 0 | 0 | 0 | - |                    |
| HS3S5_HUMAN | 0 | 0 | 0 | 0 | 0 | 1 | 0 | 0 | 0 | - |                    |
| HS71L_HUMAN | 0 | 0 | 0 | 0 | 0 | 0 | 1 | 0 | 0 | - |                    |
| HSDL1_HUMAN | 0 | 0 | 0 | 0 | 1 | 0 | 0 | 0 | 0 | - | mit                |
| HSF2B_HUMAN | 0 | 0 | 0 | 0 | 0 | 1 | 0 | 0 | 0 | - |                    |
| HSH2D_HUMAN | 0 | 0 | 0 | 0 | 0 | 1 | 0 | 0 | 0 | - | cyt, nuc           |
| HSPB7_HUMAN | 0 | 0 | 0 | 0 | 1 | 0 | 0 | 0 | 0 | - |                    |
| HTAI2_HUMAN | 0 | 0 | 0 | 0 | 0 | 0 | 0 | 0 | 1 | - | cyt, nuc           |
| HV308_HUMAN | 1 | 0 | 0 | 0 | 0 | 0 | 0 | 0 | 0 | - |                    |
| HYPK_HUMAN  | 0 | 0 | 0 | 0 | 0 | 1 | 0 | 0 | 0 | - |                    |
| I5P2_HUMAN  | 0 | 0 | 1 | 0 | 0 | 0 | 0 | 0 | 0 | - |                    |
| IDI1_HUMAN  | 0 | 0 | 0 | 0 | 1 | 0 | 0 | 0 | 0 | - | per                |
| IF4A3_HUMAN | 0 | 0 | 0 | 0 | 0 | 0 | 0 | 0 | 1 | - | cyt, nuc           |
| IF4G3_HUMAN | 0 | 0 | 0 | 0 | 0 | 0 | 0 | 0 | 1 | - |                    |
| IF16_HUMAN  | 0 | 0 | 1 | 0 | 0 | 0 | 0 | 0 | 0 | - |                    |
| IFRD2_HUMAN | 0 | 0 | 0 | 0 | 0 | 0 | 0 | 0 | 1 | - |                    |
| IFT74_HUMAN | 0 | 0 | 0 | 0 | 0 | 0 | 0 | 0 | 1 | - | cyt                |
| IGFL4_HUMAN | 0 | 0 | 0 | 0 | 0 | 1 | 0 | 0 | 0 | - |                    |
| IGKC_HUMAN  | 0 | 0 | 0 | 0 | 0 | 0 | 1 | 0 | 0 | - |                    |
| IKIP_HUMAN  | 0 | 0 | 0 | 0 | 0 | 0 | 0 | 0 | 1 | - | end                |
| IKZF5_HUMAN | 0 | 0 | 0 | 0 | 0 | 1 | 0 | 0 | 0 | - |                    |
| INCE_HUMAN  | 0 | 0 | 0 | 0 | 0 | 0 | 0 | 0 | 1 | - | cyt, cen, ske, nuc |
| INHA_HUMAN  | 0 | 0 | 0 | 0 | 0 | 0 | 0 | 0 | 1 | - | ext                |
| IP6K2_HUMAN | 0 | 0 | 1 | 0 | 0 | 0 | 0 | 0 | 0 | - | nuc                |
| IQCF1_HUMAN | 0 | 0 | 0 | 0 | 0 | 1 | 0 | 0 | 0 | - |                    |
| IQUB_HUMAN  | 0 | 0 | 1 | 0 | 0 | 0 | 0 | 0 | 0 | - |                    |
| IRAK4_HUMAN | 0 | 0 | 0 | 0 | 0 | 0 | 0 | 0 | 1 | - |                    |
| IREB2_HUMAN | 0 | 0 | 0 | 0 | 1 | 0 | 0 | 0 | 0 | - | cyt                |
| IRG1_HUMAN  | 0 | 0 | 0 | 0 | 0 | 0 | 0 | 0 | 1 | - |                    |
| IRK12_HUMAN | 1 | 0 | 0 | 0 | 0 | 0 | 0 | 0 | 0 | - |                    |
| IRK14_HUMAN | 1 | 0 | 0 | 0 | 0 | 0 | 0 | 0 | 0 | - |                    |
| IRK16_HUMAN | 1 | 0 | 0 | 0 | 0 | 0 | 0 | 0 | 0 | - |                    |
| IRK3_HUMAN  | 1 | 0 | 0 | 0 | 0 | 0 | 0 | 0 | 0 | - |                    |
| IRK4_HUMAN  | 1 | 0 | 0 | 0 | 0 | 0 | 0 | 0 | 0 | - |                    |
| IRK5_HUMAN  | 1 | 0 | 0 | 0 | 0 | 0 | 0 | 0 | 0 | - |                    |
| IRK6_HUMAN  | 1 | 0 | 0 | 0 | 0 | 0 | 0 | 0 | 0 | - |                    |
| IRK9_HUMAN  | 1 | 0 | 0 | 0 | 0 | 0 | 0 | 0 | 0 | - |                    |
| ISOC2_HUMAN | 0 | 0 | 0 | 0 | 0 | 1 | 0 | 0 | 0 | - |                    |
| ISY1_HUMAN  | 0 | 0 | 1 | 0 | 0 | 0 | 0 | 0 | 0 | - |                    |
| ITPK1_HUMAN | 0 | 0 | 0 | 0 | 0 | 0 | 0 | 1 | 0 | - |                    |
| IWS1_HUMAN  | 0 | 0 | 0 | 0 | 0 | 0 | 0 | 0 | 1 | - |                    |
| K0100_HUMAN | 0 | 0 | 0 | 0 | 0 | 0 | 0 | 0 | 1 | - |                    |
| K0141_HUMAN | 0 | 0 | 0 | 0 | 1 | 0 | 0 | 0 | 0 | - |                    |
| K0586_HUMAN | 0 | 0 | 0 | 0 | 0 | 0 | 0 | 0 | 1 | - |                    |

|             |   |   |   |   |   |   |   |   |   |   |               |
|-------------|---|---|---|---|---|---|---|---|---|---|---------------|
| K1109_HUMAN | 0 | 0 | 0 | 0 | 0 | 0 | 0 | 0 | 1 | - |               |
| K1648_HUMAN | 0 | 0 | 0 | 0 | 0 | 1 | 0 | 0 | 0 | - |               |
| K1683_HUMAN | 0 | 0 | 1 | 0 | 0 | 0 | 0 | 0 | 0 | - |               |
| K1967_HUMAN | 0 | 0 | 1 | 0 | 0 | 0 | 0 | 0 | 0 | - |               |
| K2C5_HUMAN  | 0 | 0 | 0 | 0 | 1 | 0 | 0 | 0 | 0 | - |               |
| K2C6A_HUMAN | 0 | 0 | 0 | 0 | 0 | 1 | 0 | 0 | 0 | - |               |
| K2C6B_HUMAN | 0 | 0 | 0 | 0 | 0 | 1 | 0 | 0 | 0 | - |               |
| K2C6C_HUMAN | 0 | 0 | 0 | 0 | 0 | 1 | 0 | 0 | 0 | - |               |
| K2C75_HUMAN | 0 | 0 | 0 | 0 | 0 | 0 | 0 | 0 | 1 | - |               |
| KAPCG_HUMAN | 0 | 0 | 0 | 0 | 0 | 1 | 0 | 0 | 0 | - |               |
| KI20B_HUMAN | 0 | 0 | 0 | 0 | 0 | 1 | 0 | 0 | 0 | - | cyt, ske, nuc |
| KI2S2_HUMAN | 0 | 0 | 0 | 0 | 0 | 0 | 0 | 0 | 1 | - | mem           |
| KIF15_HUMAN | 0 | 0 | 0 | 0 | 0 | 0 | 0 | 0 | 1 | - | cyt, ske      |
| KIF1A_HUMAN | 0 | 0 | 0 | 0 | 0 | 0 | 0 | 0 | 1 | - |               |
| KIF4B_HUMAN | 0 | 0 | 0 | 0 | 0 | 1 | 0 | 0 | 0 | - |               |
| KIF5A_HUMAN | 0 | 0 | 1 | 0 | 0 | 0 | 0 | 0 | 0 | - |               |
| KIF5C_HUMAN | 0 | 0 | 0 | 0 | 0 | 0 | 0 | 0 | 1 | - |               |
| KIN17_HUMAN | 0 | 0 | 0 | 0 | 0 | 0 | 0 | 0 | 1 | - | cyt, nuc      |
| KINH_HUMAN  | 0 | 0 | 1 | 0 | 0 | 0 | 0 | 0 | 0 | - |               |
| KS6C1_HUMAN | 0 | 0 | 0 | 0 | 0 | 0 | 1 | 0 | 0 | - | cyt           |
| KSR1_HUMAN  | 0 | 0 | 0 | 0 | 0 | 1 | 0 | 0 | 0 | - |               |
| KTEL1_HUMAN | 0 | 0 | 0 | 0 | 0 | 0 | 0 | 0 | 1 | - | end           |
| LAMA3_HUMAN | 0 | 0 | 0 | 0 | 0 | 0 | 0 | 0 | 1 | - | ext           |
| LAMA5_HUMAN | 0 | 0 | 0 | 0 | 0 | 1 | 0 | 0 | 0 | - | ext           |
| LAMB4_HUMAN | 0 | 0 | 0 | 0 | 0 | 0 | 0 | 0 | 1 | - | ext           |
| LAMC1_HUMAN | 0 | 0 | 0 | 0 | 0 | 0 | 0 | 0 | 1 | - | ext           |
| LARGE_HUMAN | 0 | 0 | 0 | 0 | 0 | 1 | 0 | 0 | 0 | - | gol           |
| LARP6_HUMAN | 0 | 0 | 0 | 0 | 0 | 0 | 0 | 0 | 1 | - | cyt, nuc      |
| LAT1M_HUMAN | 0 | 0 | 0 | 0 | 0 | 1 | 0 | 0 | 0 | - |               |
| LBA1_HUMAN  | 0 | 0 | 0 | 0 | 0 | 0 | 0 | 0 | 1 | - |               |
| LDB3_HUMAN  | 0 | 0 | 0 | 0 | 0 | 0 | 1 | 0 | 0 | - | cyt, ske, nuc |
| LEG12_HUMAN | 0 | 0 | 0 | 0 | 0 | 1 | 0 | 0 | 0 | - | nuc           |
| LETM2_HUMAN | 1 | 0 | 0 | 0 | 0 | 0 | 0 | 0 | 0 | - |               |
| LGAT1_HUMAN | 1 | 0 | 0 | 0 | 0 | 0 | 0 | 0 | 0 | - | end           |
| LGR5_HUMAN  | 0 | 0 | 0 | 0 | 0 | 0 | 0 | 0 | 1 | - | mem           |
| LIGO1_HUMAN | 0 | 0 | 0 | 0 | 0 | 0 | 0 | 0 | 1 | - |               |
| LIRB1_HUMAN | 0 | 0 | 0 | 0 | 0 | 0 | 0 | 0 | 1 | - |               |
| LMA2L_HUMAN | 1 | 0 | 0 | 0 | 0 | 0 | 0 | 0 | 0 | - | gol, end      |
| LONF1_HUMAN | 0 | 0 | 0 | 0 | 0 | 0 | 0 | 1 | 0 | - |               |
| LPIN3_HUMAN | 0 | 0 | 0 | 0 | 0 | 0 | 0 | 0 | 1 | - |               |
| LRC24_HUMAN | 0 | 0 | 0 | 0 | 0 | 1 | 0 | 0 | 0 | - |               |
| LRC31_HUMAN | 0 | 0 | 0 | 0 | 0 | 0 | 0 | 0 | 1 | - |               |
| LRC40_HUMAN | 0 | 0 | 0 | 0 | 0 | 1 | 0 | 0 | 0 | - |               |
| LRC59_HUMAN | 0 | 0 | 0 | 0 | 0 | 1 | 0 | 0 | 0 | - |               |
| LRCH4_HUMAN | 0 | 0 | 0 | 0 | 0 | 0 | 1 | 0 | 0 | - |               |
| LRIQ1_HUMAN | 0 | 0 | 0 | 0 | 0 | 0 | 0 | 0 | 1 | - |               |
| LRP5_HUMAN  | 0 | 0 | 0 | 0 | 0 | 1 | 0 | 0 | 0 | - |               |
| LRRT1_HUMAN | 0 | 0 | 0 | 0 | 0 | 0 | 1 | 0 | 0 | - |               |
| LST8_HUMAN  | 0 | 0 | 0 | 0 | 0 | 0 | 0 | 0 | 1 | - |               |
| LYRM5_HUMAN | 0 | 0 | 0 | 0 | 1 | 0 | 0 | 0 | 0 | - |               |
| MA1A2_HUMAN | 0 | 0 | 0 | 0 | 0 | 0 | 0 | 0 | 1 | - | gol           |
| MACD2_HUMAN | 1 | 0 | 0 | 0 | 0 | 0 | 0 | 0 | 0 | - |               |
| MACF1_HUMAN | 0 | 0 | 0 | 0 | 0 | 0 | 0 | 0 | 1 | - | cyt, ske      |
| MACO1_HUMAN | 0 | 0 | 0 | 0 | 0 | 0 | 0 | 0 | 1 | - |               |
| MAGB1_HUMAN | 0 | 0 | 0 | 0 | 0 | 0 | 1 | 0 | 0 | - |               |
| MAP1A_HUMAN | 0 | 0 | 0 | 0 | 0 | 1 | 0 | 0 | 0 | - |               |
| MAP1B_HUMAN | 0 | 0 | 0 | 0 | 0 | 0 | 0 | 0 | 1 | - |               |
| MARH5_HUMAN | 0 | 0 | 0 | 0 | 0 | 0 | 1 | 0 | 0 | - | omm, mit      |
| MCP_HUMAN   | 0 | 0 | 0 | 0 | 0 | 1 | 0 | 0 | 0 | - | cyt           |
| MCTP1_HUMAN | 0 | 0 | 0 | 0 | 0 | 0 | 0 | 0 | 1 | - |               |
| MDN1_HUMAN  | 0 | 0 | 0 | 0 | 0 | 0 | 0 | 0 | 1 | - |               |
| MED13_HUMAN | 0 | 0 | 0 | 0 | 0 | 0 | 0 | 0 | 1 | - | nuc           |
| MEG11_HUMAN | 0 | 0 | 0 | 0 | 0 | 1 | 0 | 0 | 0 | - | mem           |
| MENTO_HUMAN | 1 | 0 | 0 | 0 | 0 | 0 | 0 | 0 | 0 | - |               |
| MEST_HUMAN  | 0 | 0 | 0 | 0 | 0 | 1 | 0 | 0 | 0 | - |               |
| MET7A_HUMAN | 0 | 0 | 0 | 0 | 0 | 0 | 0 | 0 | 1 | - | end           |
| MET7B_HUMAN | 0 | 0 | 0 | 0 | 0 | 1 | 0 | 0 | 0 | - |               |
| MFS10_HUMAN | 0 | 0 | 0 | 0 | 0 | 0 | 0 | 0 | 1 | - |               |
| MFSD3_HUMAN | 1 | 0 | 0 | 0 | 0 | 0 | 0 | 0 | 0 | - |               |
| MIA3_HUMAN  | 0 | 0 | 0 | 0 | 0 | 1 | 0 | 0 | 0 | - | end           |
| MINP1_HUMAN | 0 | 0 | 0 | 0 | 0 | 1 | 0 | 0 | 0 | - |               |
| MINT_HUMAN  | 0 | 0 | 0 | 0 | 0 | 1 | 0 | 0 | 0 | - | nuc           |
| MK07_HUMAN  | 0 | 0 | 0 | 0 | 0 | 0 | 0 | 0 | 1 | - | cyt, nuc      |
| MLH3_HUMAN  | 0 | 0 | 0 | 0 | 0 | 0 | 0 | 0 | 1 | - |               |
| MLL3_HUMAN  | 0 | 0 | 0 | 0 | 0 | 0 | 0 | 0 | 1 | - |               |
| MMAC_HUMAN  | 0 | 0 | 0 | 0 | 1 | 0 | 0 | 0 | 0 | - |               |
| MOBP_HUMAN  | 0 | 0 | 0 | 0 | 0 | 1 | 0 | 0 | 0 | - |               |
| MOES_HUMAN  | 0 | 0 | 0 | 0 | 0 | 0 | 1 | 0 | 0 | - |               |
| MOT12_HUMAN | 0 | 0 | 0 | 0 | 0 | 0 | 0 | 0 | 1 | - |               |
| MRP1_HUMAN  | 0 | 0 | 0 | 0 | 0 | 0 | 0 | 0 | 1 | - | mem           |
| MRRP1_HUMAN | 0 | 0 | 0 | 0 | 1 | 0 | 0 | 0 | 0 | - | mit           |
| MS11H_HUMAN | 0 | 0 | 0 | 0 | 0 | 0 | 0 | 0 | 1 | - |               |
| MSS4_HUMAN  | 0 | 0 | 0 | 0 | 0 | 0 | 0 | 0 | 1 | - |               |
| MT1H_HUMAN  | 0 | 0 | 1 | 0 | 0 | 0 | 0 | 0 | 0 | - |               |
| MT3_HUMAN   | 0 | 0 | 1 | 0 | 0 | 0 | 0 | 0 | 0 | - |               |
| MUC1_HUMAN  | 0 | 0 | 1 | 0 | 0 | 0 | 0 | 0 | 0 | - | mem           |
| MUC12_HUMAN | 0 | 0 | 0 | 0 | 0 | 1 | 0 | 0 | 0 | - |               |



|             |   |   |   |   |   |   |   |   |   |   |          |
|-------------|---|---|---|---|---|---|---|---|---|---|----------|
| MXRA7_HUMAN | 1 | 0 | 0 | 0 | 0 | 0 | 0 | 0 | 0 | - |          |
| MYH11_HUMAN | 0 | 0 | 0 | 0 | 0 | 0 | 0 | 0 | 1 | - |          |
| MYH13_HUMAN | 0 | 0 | 0 | 0 | 0 | 0 | 0 | 0 | 1 | - | cyt, ske |
| MYH3_HUMAN  | 0 | 0 | 0 | 0 | 0 | 0 | 1 | 0 | 0 | - | cyt, ske |
| MYH4_HUMAN  | 0 | 0 | 0 | 0 | 0 | 0 | 1 | 0 | 0 | - | cyt, ske |
| MYH6_HUMAN  | 0 | 0 | 0 | 0 | 0 | 0 | 1 | 0 | 0 | - | cyt, ske |
| MYOME_HUMAN | 0 | 0 | 0 | 0 | 0 | 0 | 0 | 0 | 1 | - |          |
| MYP2_HUMAN  | 0 | 0 | 0 | 0 | 0 | 0 | 1 | 0 | 0 | - |          |
| NADK_HUMAN  | 0 | 0 | 0 | 0 | 0 | 0 | 0 | 0 | 1 | - |          |
| NAT8B_HUMAN | 0 | 0 | 0 | 0 | 0 | 1 | 0 | 0 | 0 | - |          |
| NBEL1_HUMAN | 0 | 0 | 0 | 0 | 0 | 0 | 0 | 0 | 1 | - |          |
| NCOA4_HUMAN | 0 | 0 | 0 | 0 | 1 | 0 | 0 | 0 | 0 | - |          |
| NDC80_HUMAN | 0 | 0 | 0 | 0 | 0 | 0 | 0 | 0 | 1 | - | nuc      |
| NDST1_HUMAN | 0 | 0 | 0 | 0 | 0 | 1 | 0 | 0 | 0 | - | gol      |
| NDST2_HUMAN | 0 | 0 | 0 | 0 | 0 | 1 | 0 | 0 | 0 | - |          |
| NDUF4_HUMAN | 0 | 0 | 0 | 0 | 1 | 0 | 0 | 0 | 0 | - | mit      |
| NELF_HUMAN  | 1 | 0 | 0 | 0 | 0 | 0 | 0 | 0 | 0 | - | mem      |
| NEUR4_HUMAN | 0 | 0 | 0 | 0 | 1 | 0 | 0 | 0 | 0 | - | lys      |
| NFH_HUMAN   | 0 | 0 | 0 | 0 | 0 | 1 | 0 | 0 | 0 | - |          |
| NFXL1_HUMAN | 0 | 0 | 0 | 0 | 1 | 0 | 0 | 0 | 0 | - |          |
| NFYA_HUMAN  | 0 | 0 | 0 | 0 | 0 | 0 | 0 | 0 | 1 | - | nuc      |
| NFYB_HUMAN  | 0 | 0 | 0 | 0 | 0 | 0 | 0 | 0 | 1 | - | nuc      |
| NFYC_HUMAN  | 0 | 0 | 0 | 0 | 0 | 0 | 0 | 0 | 1 | - | nuc      |
| NGAL_HUMAN  | 0 | 0 | 0 | 0 | 0 | 0 | 1 | 0 | 0 | - | ext      |
| NGB_HUMAN   | 0 | 0 | 0 | 0 | 0 | 0 | 0 | 0 | 1 | - |          |
| NGLY1_HUMAN | 0 | 0 | 0 | 0 | 0 | 1 | 0 | 0 | 0 | - | cyt      |
| NGRN_HUMAN  | 0 | 0 | 0 | 0 | 0 | 0 | 0 | 0 | 1 | - | nuc      |
| NHDC1_HUMAN | 1 | 0 | 0 | 0 | 0 | 0 | 0 | 0 | 0 | - |          |
| NHDC2_HUMAN | 0 | 0 | 0 | 0 | 0 | 0 | 0 | 0 | 1 | - |          |
| NKTR_HUMAN  | 0 | 0 | 0 | 0 | 0 | 0 | 0 | 0 | 1 | - |          |
| NOC4L_HUMAN | 0 | 0 | 0 | 0 | 0 | 0 | 0 | 0 | 1 | - | nuc      |
| NOP14_HUMAN | 0 | 0 | 0 | 0 | 0 | 0 | 0 | 0 | 1 | - |          |
| NR4A3_HUMAN | 0 | 0 | 0 | 0 | 0 | 0 | 0 | 0 | 1 | - |          |
| NRDC_HUMAN  | 0 | 0 | 0 | 1 | 0 | 0 | 0 | 0 | 0 | - |          |
| NSMA_HUMAN  | 0 | 0 | 0 | 0 | 0 | 1 | 0 | 0 | 0 | - |          |
| NTRK2_HUMAN | 0 | 0 | 0 | 0 | 0 | 0 | 0 | 0 | 1 | - |          |
| NUD13_HUMAN | 0 | 0 | 0 | 0 | 1 | 0 | 0 | 0 | 0 | - |          |
| NUD17_HUMAN | 0 | 0 | 0 | 0 | 0 | 1 | 0 | 0 | 0 | - |          |
| NUD19_HUMAN | 1 | 0 | 0 | 0 | 0 | 0 | 0 | 0 | 0 | - |          |
| NUP43_HUMAN | 0 | 0 | 0 | 0 | 0 | 0 | 0 | 0 | 1 | - | nuc      |
| NUP54_HUMAN | 0 | 0 | 0 | 0 | 0 | 1 | 0 | 0 | 0 | - |          |
| NUPL2_HUMAN | 0 | 0 | 0 | 0 | 0 | 0 | 0 | 0 | 1 | - | cyt, nuc |
| NUSAP_HUMAN | 0 | 0 | 0 | 0 | 0 | 0 | 1 | 0 | 0 | - |          |
| OCAD1_HUMAN | 0 | 0 | 0 | 0 | 1 | 0 | 0 | 0 | 0 | - |          |
| OCAD2_HUMAN | 0 | 0 | 0 | 0 | 0 | 1 | 0 | 0 | 0 | - |          |
| OCTC_HUMAN  | 0 | 0 | 0 | 0 | 1 | 0 | 0 | 0 | 0 | - |          |
| OGT1_HUMAN  | 0 | 0 | 1 | 0 | 0 | 0 | 0 | 0 | 0 | - |          |
| OR4D5_HUMAN | 0 | 0 | 0 | 0 | 0 | 0 | 0 | 0 | 1 | - | mem      |
| OR8B4_HUMAN | 0 | 0 | 0 | 0 | 0 | 1 | 0 | 0 | 0 | - | mem      |
| OSBP1_HUMAN | 0 | 0 | 0 | 0 | 0 | 0 | 0 | 0 | 1 | - | gol, cyt |
| OVOS1_HUMAN | 0 | 0 | 0 | 0 | 0 | 1 | 0 | 0 | 0 | - |          |
| PACRG_HUMAN | 0 | 0 | 0 | 0 | 1 | 0 | 0 | 0 | 0 | - |          |
| PACS2_HUMAN | 0 | 0 | 1 | 0 | 0 | 0 | 0 | 0 | 0 | - | end, mit |
| PAHX_HUMAN  | 0 | 0 | 0 | 0 | 1 | 0 | 0 | 0 | 0 | - | per      |
| PAL4B_HUMAN | 0 | 0 | 0 | 0 | 0 | 1 | 0 | 0 | 0 | - |          |
| PAPD5_HUMAN | 0 | 0 | 0 | 0 | 0 | 0 | 0 | 0 | 1 | - | cyt, nuc |
| PAR12_HUMAN | 0 | 0 | 0 | 0 | 0 | 0 | 0 | 0 | 1 | - |          |
| PCD23_HUMAN | 0 | 0 | 0 | 0 | 0 | 0 | 0 | 0 | 1 | - |          |
| PCDB1_HUMAN | 0 | 0 | 0 | 0 | 0 | 0 | 0 | 0 | 1 | - |          |
| PCLO_HUMAN  | 0 | 0 | 0 | 0 | 0 | 0 | 0 | 0 | 1 | - |          |
| PDE12_HUMAN | 0 | 0 | 0 | 0 | 1 | 0 | 0 | 0 | 0 | - |          |
| PGM1_HUMAN  | 0 | 0 | 0 | 0 | 0 | 0 | 1 | 0 | 0 | - | cyt      |
| PGRC1_HUMAN | 0 | 0 | 0 | 0 | 0 | 1 | 0 | 0 | 0 | - |          |
| PHF12_HUMAN | 0 | 0 | 0 | 0 | 0 | 0 | 0 | 0 | 1 | - | nuc      |
| PHLP2_HUMAN | 0 | 0 | 0 | 0 | 0 | 0 | 0 | 0 | 1 | - | cyt, nuc |
| PI4KA_HUMAN | 0 | 0 | 0 | 0 | 0 | 0 | 0 | 0 | 1 | - |          |
| PIBF1_HUMAN | 0 | 0 | 0 | 0 | 0 | 0 | 0 | 0 | 1 | - |          |
| PIGW_HUMAN  | 0 | 0 | 0 | 0 | 0 | 0 | 0 | 0 | 1 | - |          |
| PIGY_HUMAN  | 0 | 0 | 0 | 0 | 1 | 0 | 0 | 0 | 0 | - | end      |
| PIMT_HUMAN  | 0 | 0 | 0 | 0 | 0 | 0 | 1 | 0 | 0 | - | cyt      |
| PIWL4_HUMAN | 0 | 0 | 0 | 0 | 0 | 1 | 0 | 0 | 0 | - |          |
| PKN3_HUMAN  | 0 | 0 | 0 | 0 | 0 | 1 | 0 | 0 | 0 | - | cyt, nuc |
| PLCD_HUMAN  | 1 | 0 | 0 | 0 | 0 | 0 | 0 | 0 | 0 | - |          |
| PLDN_HUMAN  | 0 | 0 | 1 | 0 | 0 | 0 | 0 | 0 | 0 | - | cyt      |
| PLM_HUMAN   | 0 | 0 | 0 | 0 | 0 | 0 | 1 | 0 | 0 | - |          |
| PLP2_HUMAN  | 0 | 0 | 0 | 0 | 0 | 0 | 1 | 0 | 0 | - |          |
| PLPL6_HUMAN | 0 | 0 | 1 | 0 | 0 | 0 | 0 | 0 | 0 | - | end, cyt |
| PLS3_HUMAN  | 0 | 0 | 1 | 0 | 0 | 0 | 0 | 0 | 0 | - |          |
| PLST_HUMAN  | 0 | 0 | 0 | 0 | 0 | 0 | 0 | 0 | 1 | - | cyt      |
| PMS1_HUMAN  | 0 | 0 | 0 | 0 | 0 | 0 | 0 | 0 | 1 | - |          |
| PODO_HUMAN  | 0 | 0 | 0 | 1 | 0 | 0 | 0 | 0 | 0 | - |          |
| POMT1_HUMAN | 0 | 0 | 0 | 0 | 0 | 1 | 0 | 0 | 0 | - | end      |
| POMT2_HUMAN | 0 | 0 | 0 | 0 | 0 | 0 | 0 | 0 | 1 | - | end      |
| PON3_HUMAN  | 0 | 0 | 0 | 0 | 0 | 1 | 0 | 0 | 0 | - |          |
| POP1_HUMAN  | 0 | 0 | 0 | 0 | 0 | 0 | 0 | 0 | 1 | - | nuc      |
| POP5_HUMAN  | 0 | 0 | 0 | 0 | 0 | 0 | 0 | 0 | 1 | - | nuc      |
| PPAP_HUMAN  | 0 | 0 | 0 | 0 | 0 | 0 | 0 | 0 | 1 | - |          |

|             |   |   |   |   |   |   |   |   |   |   |               |
|-------------|---|---|---|---|---|---|---|---|---|---|---------------|
| PPIB_HUMAN  | 0 | 0 | 0 | 0 | 0 | 0 | 1 | 0 | 0 | - | end           |
| PREY_HUMAN  | 0 | 0 | 0 | 0 | 1 | 0 | 0 | 0 | 0 | - |               |
| PRIC4_HUMAN | 0 | 0 | 0 | 0 | 1 | 0 | 0 | 0 | 0 | - |               |
| PRODL_HUMAN | 1 | 0 | 0 | 0 | 0 | 0 | 0 | 0 | 0 | - |               |
| PROF1_HUMAN | 0 | 0 | 0 | 0 | 0 | 0 | 1 | 0 | 0 | - | cyt, ske      |
| PRS35_HUMAN | 0 | 0 | 0 | 0 | 1 | 0 | 0 | 0 | 0 | - |               |
| PRSL1_HUMAN | 0 | 0 | 0 | 0 | 0 | 1 | 0 | 0 | 0 | - |               |
| PSA7_HUMAN  | 0 | 0 | 0 | 0 | 0 | 0 | 1 | 0 | 0 | - | cyt, nuc      |
| PSG8_HUMAN  | 0 | 0 | 0 | 0 | 0 | 1 | 0 | 0 | 0 | - |               |
| PSG9_HUMAN  | 0 | 0 | 0 | 0 | 0 | 1 | 0 | 0 | 0 | - |               |
| PSME1_HUMAN | 0 | 0 | 0 | 0 | 0 | 0 | 1 | 0 | 0 | - |               |
| PSME4_HUMAN | 0 | 0 | 0 | 0 | 0 | 0 | 0 | 0 | 1 | - | nuc           |
| PTGR2_HUMAN | 0 | 0 | 0 | 0 | 1 | 0 | 0 | 0 | 0 | - |               |
| PTH1_HUMAN  | 0 | 0 | 0 | 0 | 0 | 1 | 0 | 0 | 0 | - |               |
| PTH2_HUMAN  | 0 | 0 | 0 | 0 | 0 | 0 | 0 | 0 | 1 | - |               |
| PTPM1_HUMAN | 0 | 0 | 0 | 1 | 0 | 0 | 0 | 0 | 0 | - |               |
| PTPRS_HUMAN | 0 | 0 | 0 | 0 | 0 | 0 | 0 | 0 | 1 | - |               |
| PTRF_HUMAN  | 0 | 0 | 0 | 0 | 0 | 0 | 0 | 1 | 0 | - | mem, mic      |
| PUS3_HUMAN  | 0 | 0 | 0 | 0 | 0 | 0 | 0 | 0 | 1 | - |               |
| PUS7_HUMAN  | 0 | 0 | 0 | 0 | 0 | 0 | 0 | 0 | 1 | - |               |
| PYGM_HUMAN  | 0 | 0 | 0 | 0 | 0 | 0 | 1 | 0 | 0 | - |               |
| PYRD2_HUMAN | 1 | 0 | 0 | 0 | 0 | 0 | 0 | 0 | 0 | - |               |
| QIL1_HUMAN  | 0 | 0 | 0 | 0 | 1 | 0 | 0 | 0 | 0 | - |               |
| QOR_HUMAN   | 0 | 0 | 0 | 0 | 0 | 0 | 1 | 0 | 0 | - | cyt           |
| QTRD1_HUMAN | 0 | 0 | 0 | 0 | 0 | 0 | 0 | 0 | 1 | - |               |
| R3HD2_HUMAN | 0 | 0 | 0 | 0 | 0 | 0 | 0 | 0 | 1 | - |               |
| R51A2_HUMAN | 0 | 0 | 0 | 0 | 0 | 0 | 0 | 0 | 1 | - |               |
| RAB10_HUMAN | 0 | 0 | 0 | 0 | 0 | 0 | 1 | 0 | 0 | - |               |
| RAB14_HUMAN | 0 | 0 | 0 | 0 | 0 | 0 | 1 | 0 | 0 | - |               |
| RAB15_HUMAN | 0 | 0 | 0 | 0 | 0 | 0 | 1 | 0 | 0 | - |               |
| RAB21_HUMAN | 0 | 0 | 0 | 0 | 0 | 0 | 1 | 0 | 0 | - |               |
| RAB24_HUMAN | 0 | 0 | 0 | 0 | 1 | 0 | 0 | 0 | 0 | - |               |
| RAB2A_HUMAN | 0 | 0 | 0 | 0 | 0 | 0 | 1 | 0 | 0 | - | gol, end      |
| RAB31_HUMAN | 0 | 0 | 1 | 0 | 0 | 0 | 0 | 0 | 0 | - |               |
| RAB38_HUMAN | 1 | 0 | 0 | 0 | 0 | 0 | 0 | 0 | 0 | - |               |
| RAB3D_HUMAN | 0 | 0 | 0 | 0 | 1 | 0 | 0 | 0 | 0 | - |               |
| RAB43_HUMAN | 0 | 0 | 1 | 0 | 0 | 0 | 0 | 0 | 0 | - |               |
| RAB4B_HUMAN | 0 | 0 | 0 | 0 | 1 | 0 | 0 | 0 | 0 | - |               |
| RAB5B_HUMAN | 0 | 0 | 0 | 0 | 0 | 0 | 1 | 0 | 0 | - | cyt, mem      |
| RAB5C_HUMAN | 0 | 0 | 0 | 0 | 0 | 0 | 1 | 0 | 0 | - |               |
| RAB7A_HUMAN | 0 | 0 | 0 | 0 | 0 | 0 | 1 | 0 | 0 | - | cyt, lys      |
| RAB7L_HUMAN | 1 | 0 | 0 | 0 | 0 | 0 | 0 | 0 | 0 | - |               |
| RAD26_HUMAN | 1 | 0 | 0 | 0 | 0 | 0 | 0 | 0 | 0 | - |               |
| RAD52_HUMAN | 0 | 0 | 0 | 0 | 0 | 0 | 0 | 0 | 1 | - |               |
| RAI1_HUMAN  | 0 | 0 | 0 | 0 | 0 | 0 | 0 | 0 | 1 | - |               |
| RAN_HUMAN   | 0 | 0 | 1 | 0 | 0 | 0 | 0 | 0 | 0 | - | cyt, nuc      |
| RAP1B_HUMAN | 0 | 0 | 0 | 0 | 0 | 0 | 1 | 0 | 0 | - | cyt, mem      |
| RAYL_HUMAN  | 0 | 0 | 0 | 1 | 0 | 0 | 0 | 0 | 0 | - |               |
| RB33B_HUMAN | 0 | 0 | 0 | 0 | 0 | 0 | 1 | 0 | 0 | - |               |
| RBAK_HUMAN  | 0 | 0 | 0 | 0 | 0 | 0 | 0 | 0 | 1 | - | nuc           |
| RBGPR_HUMAN | 0 | 0 | 1 | 0 | 0 | 0 | 0 | 0 | 0 | - | cyt           |
| RBM24_HUMAN | 1 | 0 | 0 | 0 | 0 | 0 | 0 | 0 | 0 | - |               |
| RBM38_HUMAN | 1 | 0 | 0 | 0 | 0 | 0 | 0 | 0 | 0 | - | cyt, nuc      |
| RBM9_HUMAN  | 0 | 0 | 0 | 0 | 0 | 0 | 0 | 0 | 1 | - |               |
| RCAS1_HUMAN | 0 | 0 | 0 | 0 | 0 | 0 | 0 | 0 | 1 | - | gol           |
| RCBT2_HUMAN | 0 | 0 | 0 | 0 | 0 | 0 | 0 | 0 | 1 | - |               |
| RCL1_HUMAN  | 1 | 0 | 0 | 0 | 0 | 0 | 0 | 0 | 0 | - |               |
| RD3_HUMAN   | 0 | 0 | 1 | 0 | 0 | 0 | 0 | 0 | 0 | - |               |
| RDH14_HUMAN | 0 | 0 | 0 | 0 | 1 | 0 | 0 | 0 | 0 | - |               |
| RDH16_HUMAN | 0 | 0 | 0 | 0 | 0 | 1 | 0 | 0 | 0 | - | end, mic      |
| RENH_HUMAN  | 1 | 0 | 0 | 0 | 0 | 0 | 0 | 0 | 0 | - |               |
| RET2_HUMAN  | 0 | 0 | 1 | 0 | 0 | 0 | 0 | 0 | 0 | - | cyt           |
| RETST_HUMAN | 1 | 0 | 0 | 0 | 0 | 0 | 0 | 0 | 0 | - |               |
| RFPL1_HUMAN | 0 | 0 | 0 | 0 | 0 | 1 | 0 | 0 | 0 | - |               |
| RFT1_HUMAN  | 0 | 0 | 0 | 0 | 0 | 0 | 0 | 0 | 1 | - |               |
| RGDSR_HUMAN | 0 | 0 | 1 | 0 | 0 | 0 | 0 | 0 | 0 | - |               |
| RGPD4_HUMAN | 0 | 0 | 0 | 0 | 0 | 0 | 0 | 0 | 1 | - |               |
| RHCE_HUMAN  | 0 | 0 | 0 | 0 | 0 | 0 | 0 | 0 | 1 | - |               |
| RHG05_HUMAN | 0 | 0 | 0 | 0 | 0 | 0 | 0 | 0 | 1 | - | cyt           |
| RHG22_HUMAN | 0 | 0 | 0 | 0 | 0 | 1 | 0 | 0 | 0 | - |               |
| RHOA_HUMAN  | 0 | 0 | 0 | 0 | 1 | 0 | 0 | 0 | 0 | - | cyt, mem, ske |
| RHOU_HUMAN  | 0 | 0 | 0 | 0 | 0 | 0 | 0 | 0 | 1 | - | gol, cyt, mem |
| RIC8A_HUMAN | 0 | 0 | 0 | 0 | 0 | 0 | 0 | 0 | 1 | - |               |
| RICTR_HUMAN | 0 | 0 | 0 | 0 | 0 | 0 | 0 | 0 | 1 | - |               |
| RILP_HUMAN  | 0 | 0 | 0 | 0 | 1 | 0 | 0 | 0 | 0 | - |               |
| RIM3A_HUMAN | 1 | 0 | 0 | 0 | 0 | 0 | 0 | 0 | 0 | - |               |
| RIMKA_HUMAN | 0 | 0 | 0 | 0 | 0 | 0 | 0 | 1 | 0 | - |               |
| RIMKB_HUMAN | 0 | 0 | 0 | 0 | 0 | 0 | 0 | 1 | 0 | - |               |
| RIPK3_HUMAN | 0 | 0 | 1 | 0 | 0 | 0 | 0 | 0 | 0 | - |               |
| RMD2_HUMAN  | 1 | 0 | 0 | 0 | 0 | 0 | 0 | 0 | 0 | - |               |
| RN150_HUMAN | 0 | 0 | 0 | 0 | 0 | 1 | 0 | 0 | 0 | - |               |
| RN220_HUMAN | 0 | 0 | 0 | 0 | 0 | 1 | 0 | 0 | 0 | - |               |
| RNF31_HUMAN | 0 | 0 | 0 | 0 | 0 | 0 | 0 | 0 | 1 | - |               |
| RNF44_HUMAN | 0 | 0 | 0 | 0 | 0 | 1 | 0 | 0 | 0 | - |               |
| RNT2_HUMAN  | 0 | 0 | 0 | 0 | 0 | 1 | 0 | 0 | 0 | - |               |
| RPAP3_HUMAN | 0 | 0 | 0 | 0 | 0 | 0 | 1 | 0 | 0 | - |               |
| RPN1_HUMAN  | 0 | 0 | 0 | 0 | 0 | 0 | 1 | 0 | 0 | - | end           |

|             |   |   |   |   |   |   |   |   |   |   |          |
|-------------|---|---|---|---|---|---|---|---|---|---|----------|
| RPP21_HUMAN | 0 | 0 | 0 | 0 | 0 | 0 | 0 | 0 | 1 | - | nuc      |
| RPP29_HUMAN | 0 | 0 | 0 | 0 | 0 | 0 | 0 | 0 | 1 | - | nuc      |
| RPP30_HUMAN | 0 | 0 | 0 | 0 | 0 | 0 | 0 | 0 | 1 | - |          |
| RRMJ3_HUMAN | 0 | 0 | 0 | 0 | 0 | 0 | 0 | 1 | 0 | - | nuc      |
| RRP12_HUMAN | 0 | 0 | 0 | 0 | 0 | 1 | 0 | 0 | 0 | - |          |
| RRP44_HUMAN | 0 | 0 | 0 | 0 | 0 | 0 | 0 | 0 | 1 | - | cyt, nuc |
| RRP5_HUMAN  | 0 | 0 | 0 | 0 | 0 | 0 | 0 | 0 | 1 | - | nuc      |
| RSPH9_HUMAN | 0 | 0 | 0 | 0 | 0 | 0 | 0 | 1 | 0 | - |          |
| S12A5_HUMAN | 1 | 0 | 0 | 0 | 0 | 0 | 0 | 0 | 0 | - |          |
| S12A7_HUMAN | 0 | 0 | 0 | 1 | 0 | 0 | 0 | 0 | 0 | - |          |
| S13A5_HUMAN | 1 | 0 | 0 | 0 | 0 | 0 | 0 | 0 | 0 | - |          |
| S14L1_HUMAN | 0 | 0 | 0 | 0 | 0 | 1 | 0 | 0 | 0 | - |          |
| S1PR5_HUMAN | 0 | 0 | 0 | 0 | 0 | 0 | 0 | 0 | 1 | - | mem      |
| S20A1_HUMAN | 1 | 0 | 0 | 0 | 0 | 0 | 0 | 0 | 0 | - |          |
| S20A2_HUMAN | 1 | 0 | 0 | 0 | 0 | 0 | 0 | 0 | 0 | - | mem      |
| S35B3_HUMAN | 0 | 0 | 0 | 0 | 0 | 1 | 0 | 0 | 0 | - | gol      |
| S35D1_HUMAN | 1 | 0 | 0 | 0 | 0 | 0 | 0 | 0 | 0 | - | end      |
| S35D2_HUMAN | 0 | 0 | 0 | 0 | 0 | 0 | 0 | 0 | 1 | - | gol      |
| S35E1_HUMAN | 1 | 0 | 0 | 0 | 0 | 0 | 0 | 0 | 0 | - |          |
| S35E2_HUMAN | 1 | 0 | 0 | 0 | 0 | 0 | 0 | 0 | 0 | - |          |
| S35E4_HUMAN | 1 | 0 | 0 | 0 | 0 | 0 | 0 | 0 | 0 | - |          |
| S38A2_HUMAN | 0 | 0 | 0 | 0 | 0 | 0 | 1 | 0 | 0 | - | mem      |
| S38A3_HUMAN | 0 | 0 | 0 | 0 | 0 | 0 | 1 | 0 | 0 | - |          |
| S45A3_HUMAN | 0 | 0 | 0 | 0 | 0 | 1 | 0 | 0 | 0 | - |          |
| SAC1_HUMAN  | 0 | 0 | 0 | 0 | 0 | 0 | 0 | 0 | 1 | - |          |
| SAMP_HUMAN  | 0 | 0 | 0 | 0 | 0 | 0 | 1 | 0 | 0 | - | ext      |
| SART3_HUMAN | 0 | 0 | 0 | 0 | 0 | 0 | 0 | 0 | 1 | - | cyt, nuc |
| SC5D_HUMAN  | 0 | 0 | 0 | 0 | 0 | 0 | 0 | 0 | 1 | - |          |
| SC61G_HUMAN | 0 | 0 | 0 | 0 | 0 | 0 | 0 | 0 | 1 | - |          |
| SCAM4_HUMAN | 0 | 0 | 0 | 0 | 0 | 0 | 0 | 0 | 1 | - |          |
| SCN7A_HUMAN | 0 | 0 | 0 | 0 | 0 | 0 | 0 | 0 | 1 | - |          |
| SCPDH_HUMAN | 0 | 0 | 0 | 0 | 1 | 0 | 0 | 0 | 0 | - |          |
| SDCG1_HUMAN | 0 | 0 | 0 | 0 | 0 | 0 | 0 | 0 | 1 | - |          |
| SE1L2_HUMAN | 0 | 0 | 0 | 0 | 0 | 0 | 0 | 0 | 1 | - |          |
| SEC62_HUMAN | 0 | 0 | 0 | 0 | 0 | 0 | 0 | 0 | 1 | - |          |
| SEC63_HUMAN | 0 | 0 | 0 | 0 | 0 | 0 | 0 | 0 | 1 | - | end      |
| SEHL2_HUMAN | 0 | 0 | 0 | 0 | 1 | 0 | 0 | 0 | 0 | - |          |
| SEMG1_HUMAN | 0 | 0 | 0 | 0 | 0 | 0 | 0 | 0 | 1 | - | ext      |
| SEN2_HUMAN  | 0 | 0 | 0 | 0 | 0 | 0 | 0 | 0 | 1 | - | nuc      |
| SEN54_HUMAN | 0 | 0 | 0 | 0 | 0 | 0 | 0 | 0 | 1 | - |          |
| SETD4_HUMAN | 0 | 0 | 0 | 0 | 0 | 0 | 0 | 0 | 1 | - |          |
| SG269_HUMAN | 0 | 0 | 0 | 0 | 0 | 1 | 0 | 0 | 0 | - |          |
| SGPP1_HUMAN | 0 | 0 | 0 | 0 | 0 | 1 | 0 | 0 | 0 | - | end      |
| SHLB1_HUMAN | 0 | 0 | 0 | 1 | 0 | 0 | 0 | 0 | 0 | - |          |
| SHRM3_HUMAN | 0 | 0 | 0 | 0 | 0 | 0 | 0 | 0 | 1 | - |          |
| SHSA2_HUMAN | 0 | 0 | 0 | 0 | 0 | 1 | 0 | 0 | 0 | - |          |
| SIA8B_HUMAN | 0 | 0 | 0 | 0 | 0 | 0 | 0 | 0 | 1 | - |          |
| SIRT4_HUMAN | 1 | 0 | 0 | 0 | 0 | 0 | 0 | 0 | 0 | - | mit, mm  |
| SKA3_HUMAN  | 0 | 0 | 0 | 0 | 0 | 0 | 0 | 0 | 1 | - | cyt, ske |
| SL9A7_HUMAN | 1 | 0 | 0 | 0 | 0 | 0 | 0 | 0 | 0 | - | gol      |
| SL9A8_HUMAN | 1 | 0 | 0 | 0 | 0 | 0 | 0 | 0 | 0 | - | gol      |
| SLIT3_HUMAN | 0 | 0 | 1 | 0 | 0 | 0 | 0 | 0 | 0 | - |          |
| SMAD5_HUMAN | 0 | 0 | 1 | 0 | 0 | 0 | 0 | 0 | 0 | - | cyt, nuc |
| SMCA5_HUMAN | 0 | 0 | 0 | 0 | 0 | 0 | 0 | 0 | 1 | - | nuc      |
| SMCR7_HUMAN | 0 | 0 | 0 | 0 | 0 | 0 | 1 | 0 | 0 | - |          |
| SND1_HUMAN  | 0 | 0 | 0 | 0 | 1 | 0 | 0 | 0 | 0 | - | cyt, nuc |
| SNF5_HUMAN  | 0 | 0 | 0 | 0 | 0 | 0 | 0 | 0 | 1 | - | nuc      |
| SNN_HUMAN   | 0 | 0 | 1 | 0 | 0 | 0 | 0 | 0 | 0 | - | omm, mit |
| SNPH_HUMAN  | 0 | 0 | 0 | 0 | 1 | 0 | 0 | 0 | 0 | - |          |
| SNTB2_HUMAN | 1 | 0 | 0 | 0 | 0 | 0 | 0 | 0 | 0 | - | cyt      |
| SNX7_HUMAN  | 0 | 0 | 0 | 0 | 0 | 0 | 1 | 0 | 0 | - |          |
| SO1B1_HUMAN | 0 | 0 | 0 | 0 | 0 | 0 | 0 | 0 | 1 | - | mem      |
| SORC1_HUMAN | 0 | 0 | 0 | 0 | 0 | 0 | 0 | 0 | 1 | - |          |
| SOX3_HUMAN  | 0 | 0 | 0 | 0 | 0 | 1 | 0 | 0 | 0 | - | nuc      |
| SPAT5_HUMAN | 0 | 0 | 1 | 0 | 0 | 0 | 0 | 0 | 0 | - |          |
| SPAT7_HUMAN | 0 | 0 | 0 | 0 | 0 | 0 | 0 | 0 | 1 | - |          |
| SPEE_HUMAN  | 0 | 0 | 0 | 0 | 0 | 0 | 0 | 0 | 1 | - |          |
| SPSY_HUMAN  | 0 | 0 | 0 | 0 | 0 | 1 | 0 | 0 | 0 | - |          |
| SPT4H_HUMAN | 0 | 0 | 0 | 0 | 0 | 0 | 0 | 0 | 1 | - | nuc      |
| SPT5H_HUMAN | 0 | 0 | 0 | 0 | 0 | 0 | 0 | 0 | 1 | - | nuc      |
| SPT6H_HUMAN | 0 | 0 | 0 | 0 | 0 | 0 | 0 | 0 | 1 | - |          |
| SPTN4_HUMAN | 0 | 0 | 0 | 0 | 0 | 0 | 1 | 0 | 0 | - |          |
| SPXN4_HUMAN | 0 | 0 | 0 | 0 | 0 | 1 | 0 | 0 | 0 | - |          |
| STAM1_HUMAN | 0 | 0 | 1 | 0 | 0 | 0 | 0 | 0 | 0 | - |          |
| STAM2_HUMAN | 0 | 0 | 0 | 0 | 0 | 0 | 0 | 0 | 1 | - |          |
| STAR4_HUMAN | 0 | 0 | 0 | 0 | 0 | 1 | 0 | 0 | 0 | - |          |
| STAR5_HUMAN | 0 | 0 | 0 | 1 | 0 | 0 | 0 | 0 | 0 | - |          |
| STK11_HUMAN | 0 | 0 | 1 | 0 | 0 | 0 | 0 | 0 | 0 | - | cyt, nuc |
| STXB1_HUMAN | 0 | 0 | 0 | 0 | 0 | 1 | 0 | 0 | 0 | - | cyt      |
| SUMF1_HUMAN | 0 | 0 | 0 | 0 | 0 | 1 | 0 | 0 | 0 | - | end      |
| SYNE2_HUMAN | 0 | 0 | 0 | 0 | 0 | 0 | 0 | 0 | 1 | - |          |
| SYUB_HUMAN  | 0 | 0 | 0 | 0 | 0 | 1 | 0 | 0 | 0 | - | cyt      |
| TAGL2_HUMAN | 0 | 0 | 0 | 0 | 0 | 0 | 1 | 0 | 0 | - |          |
| TATD3_HUMAN | 0 | 0 | 0 | 0 | 1 | 0 | 0 | 0 | 0 | - |          |
| TBA1C_HUMAN | 0 | 0 | 0 | 0 | 0 | 1 | 0 | 0 | 0 | - |          |
| TBB3_HUMAN  | 0 | 0 | 0 | 0 | 0 | 1 | 0 | 0 | 0 | - |          |
| TBC20_HUMAN | 0 | 0 | 0 | 0 | 0 | 0 | 0 | 0 | 1 | - |          |

|             |   |   |   |   |   |   |   |   |   |   |          |
|-------------|---|---|---|---|---|---|---|---|---|---|----------|
| TBC24_HUMAN | 1 | 0 | 0 | 0 | 0 | 0 | 0 | 0 | 0 | - |          |
| TBCD5_HUMAN | 0 | 0 | 0 | 0 | 0 | 0 | 0 | 0 | 1 | - |          |
| TDRD7_HUMAN | 0 | 0 | 1 | 0 | 0 | 0 | 0 | 0 | 0 | - |          |
| TDRKH_HUMAN | 0 | 0 | 0 | 0 | 1 | 0 | 0 | 0 | 0 | - |          |
| TECR_HUMAN  | 0 | 0 | 0 | 0 | 0 | 0 | 0 | 0 | 1 | - | end      |
| TEX11_HUMAN | 0 | 0 | 0 | 0 | 0 | 0 | 0 | 0 | 1 | - |          |
| TEX2_HUMAN  | 0 | 0 | 0 | 0 | 0 | 0 | 0 | 0 | 1 | - |          |
| TFP11_HUMAN | 0 | 0 | 0 | 0 | 0 | 0 | 0 | 0 | 1 | - |          |
| TI23B_HUMAN | 1 | 0 | 0 | 0 | 0 | 0 | 0 | 0 | 0 | - |          |
| TKTL1_HUMAN | 1 | 0 | 0 | 0 | 0 | 0 | 0 | 0 | 0 | - | cyt, nuc |
| TLN2_HUMAN  | 0 | 0 | 0 | 0 | 0 | 0 | 1 | 0 | 0 | - | mem      |
| TLR5_HUMAN  | 0 | 0 | 0 | 0 | 0 | 0 | 0 | 0 | 1 | - |          |
| TM109_HUMAN | 0 | 0 | 0 | 0 | 0 | 0 | 1 | 0 | 0 | - |          |
| TM141_HUMAN | 0 | 0 | 0 | 0 | 0 | 1 | 0 | 0 | 0 | - |          |
| TM14E_HUMAN | 0 | 0 | 0 | 0 | 0 | 1 | 0 | 0 | 0 | - |          |
| TM160_HUMAN | 0 | 0 | 0 | 0 | 1 | 0 | 0 | 0 | 0 | - |          |
| TM173_HUMAN | 0 | 0 | 0 | 0 | 0 | 1 | 0 | 0 | 0 | - | end, mem |
| TM205_HUMAN | 0 | 0 | 0 | 0 | 0 | 1 | 0 | 0 | 0 | - |          |
| TM223_HUMAN | 0 | 0 | 0 | 0 | 1 | 0 | 0 | 0 | 0 | - |          |
| TMBI4_HUMAN | 0 | 0 | 0 | 0 | 0 | 1 | 0 | 0 | 0 | - |          |
| TMC4_HUMAN  | 0 | 0 | 0 | 0 | 0 | 0 | 0 | 0 | 1 | - |          |
| TMCO3_HUMAN | 1 | 0 | 0 | 0 | 0 | 0 | 0 | 0 | 0 | - |          |
| TMED9_HUMAN | 0 | 0 | 0 | 0 | 0 | 0 | 1 | 0 | 0 | - |          |
| TMM71_HUMAN | 0 | 0 | 0 | 0 | 0 | 0 | 0 | 0 | 1 | - |          |
| TMM8B_HUMAN | 0 | 0 | 0 | 0 | 0 | 0 | 0 | 0 | 1 | - |          |
| TMM91_HUMAN | 0 | 0 | 1 | 0 | 0 | 0 | 0 | 0 | 0 | - |          |
| TMTC1_HUMAN | 0 | 0 | 0 | 0 | 1 | 0 | 0 | 0 | 0 | - |          |
| TNFC_HUMAN  | 0 | 0 | 0 | 0 | 0 | 1 | 0 | 0 | 0 | - |          |
| TNNI3_HUMAN | 0 | 0 | 0 | 0 | 0 | 0 | 1 | 0 | 0 | - |          |
| TNNT3_HUMAN | 0 | 0 | 0 | 0 | 0 | 1 | 0 | 0 | 0 | - |          |
| TOP3A_HUMAN | 0 | 0 | 1 | 0 | 0 | 0 | 0 | 0 | 0 | - |          |
| TPR_HUMAN   | 0 | 0 | 0 | 0 | 0 | 0 | 0 | 0 | 1 | - | cyt, nuc |
| TRAKR_HUMAN | 0 | 0 | 0 | 0 | 0 | 1 | 0 | 0 | 0 | - |          |
| TRHDE_HUMAN | 0 | 0 | 0 | 0 | 0 | 1 | 0 | 0 | 0 | - |          |
| TRI14_HUMAN | 0 | 0 | 0 | 0 | 0 | 0 | 1 | 0 | 0 | - |          |
| TRI67_HUMAN | 0 | 0 | 0 | 0 | 0 | 1 | 0 | 0 | 0 | - |          |
| TRIA1_HUMAN | 0 | 0 | 0 | 0 | 1 | 0 | 0 | 0 | 0 | - | cyt, nuc |
| TRM2_HUMAN  | 0 | 0 | 0 | 0 | 1 | 0 | 0 | 0 | 0 | - |          |
| TRPM5_HUMAN | 0 | 0 | 0 | 0 | 0 | 0 | 0 | 0 | 1 | - |          |
| TRUA_HUMAN  | 0 | 0 | 1 | 0 | 0 | 0 | 0 | 0 | 0 | - |          |
| TRUB2_HUMAN | 1 | 0 | 0 | 0 | 0 | 0 | 0 | 0 | 0 | - |          |
| TRY2_HUMAN  | 0 | 0 | 0 | 0 | 0 | 0 | 1 | 0 | 0 | - | ext      |
| TSAP1_HUMAN | 0 | 0 | 0 | 0 | 0 | 0 | 0 | 0 | 1 | - |          |
| TSPO2_HUMAN | 1 | 0 | 0 | 0 | 0 | 0 | 0 | 0 | 0 | - | end      |
| TTC19_HUMAN | 0 | 0 | 0 | 0 | 1 | 0 | 0 | 0 | 0 | - |          |
| TTC27_HUMAN | 0 | 0 | 0 | 0 | 0 | 0 | 0 | 0 | 1 | - |          |
| TTC35_HUMAN | 0 | 0 | 0 | 0 | 1 | 0 | 0 | 0 | 0 | - |          |
| TTK_HUMAN   | 0 | 0 | 0 | 0 | 0 | 0 | 0 | 0 | 1 | - |          |
| TTY11_HUMAN | 0 | 0 | 0 | 0 | 0 | 1 | 0 | 0 | 0 | - |          |
| TUSC3_HUMAN | 0 | 0 | 0 | 0 | 0 | 1 | 0 | 0 | 0 | - |          |
| TXD11_HUMAN | 0 | 0 | 0 | 0 | 0 | 0 | 0 | 0 | 1 | - |          |
| U634C_HUMAN | 0 | 0 | 0 | 0 | 0 | 1 | 0 | 0 | 0 | - |          |
| UB2L3_HUMAN | 0 | 0 | 0 | 0 | 0 | 0 | 1 | 0 | 0 | - |          |
| UB6L2_HUMAN | 0 | 0 | 0 | 0 | 0 | 1 | 0 | 0 | 0 | - |          |
| UBA3_HUMAN  | 0 | 0 | 0 | 0 | 0 | 0 | 0 | 0 | 1 | - |          |
| UBE2N_HUMAN | 0 | 0 | 0 | 0 | 0 | 0 | 1 | 0 | 0 | - |          |
| UBIA1_HUMAN | 1 | 0 | 0 | 0 | 0 | 0 | 0 | 0 | 0 | - |          |
| UBP16_HUMAN | 0 | 0 | 0 | 0 | 0 | 0 | 0 | 0 | 1 | - |          |
| UBP20_HUMAN | 0 | 0 | 0 | 0 | 0 | 0 | 0 | 0 | 1 | - |          |
| UBP24_HUMAN | 0 | 0 | 0 | 0 | 0 | 0 | 0 | 0 | 1 | - |          |
| UBP32_HUMAN | 0 | 0 | 0 | 0 | 0 | 0 | 1 | 0 | 0 | - |          |
| UBP34_HUMAN | 0 | 0 | 0 | 0 | 0 | 0 | 0 | 0 | 1 | - |          |
| UBP45_HUMAN | 0 | 0 | 0 | 0 | 0 | 1 | 0 | 0 | 0 | - |          |
| UBP8_HUMAN  | 0 | 0 | 0 | 0 | 0 | 0 | 0 | 0 | 1 | - |          |
| UBR5_HUMAN  | 0 | 0 | 0 | 0 | 0 | 1 | 0 | 0 | 0 | - | nuc      |
| UCMA_HUMAN  | 0 | 0 | 0 | 0 | 0 | 0 | 0 | 0 | 1 | - |          |
| UD16_HUMAN  | 0 | 0 | 0 | 0 | 0 | 1 | 0 | 0 | 0 | - |          |
| UD3A2_HUMAN | 0 | 0 | 0 | 0 | 0 | 0 | 0 | 0 | 1 | - |          |
| UGPA_HUMAN  | 0 | 0 | 0 | 0 | 0 | 0 | 0 | 0 | 1 | - | cyt      |
| UN13A_HUMAN | 0 | 0 | 0 | 0 | 0 | 0 | 0 | 0 | 1 | - |          |
| UNC80_HUMAN | 0 | 0 | 0 | 0 | 0 | 1 | 0 | 0 | 0 | - |          |
| UTP23_HUMAN | 1 | 0 | 0 | 0 | 0 | 0 | 0 | 0 | 0 | - |          |
| VAMP8_HUMAN | 0 | 0 | 0 | 0 | 1 | 0 | 0 | 0 | 0 | - |          |
| VAPA_HUMAN  | 0 | 0 | 0 | 0 | 0 | 0 | 0 | 0 | 1 | - | mem      |
| VATC2_HUMAN | 1 | 0 | 0 | 0 | 0 | 0 | 0 | 0 | 0 | - |          |
| VATG2_HUMAN | 1 | 0 | 0 | 0 | 0 | 0 | 0 | 0 | 0 | - |          |
| VP13A_HUMAN | 0 | 0 | 0 | 0 | 0 | 0 | 0 | 0 | 1 | - |          |
| VPS25_HUMAN | 0 | 0 | 0 | 0 | 0 | 1 | 0 | 0 | 0 | - | cyt, nuc |
| VPS4A_HUMAN | 0 | 0 | 0 | 0 | 0 | 0 | 0 | 1 | 0 | - |          |
| VPS53_HUMAN | 0 | 0 | 0 | 0 | 0 | 0 | 0 | 0 | 1 | - | gol      |
| VPS54_HUMAN | 0 | 0 | 0 | 0 | 0 | 0 | 0 | 0 | 1 | - |          |
| W19L4_HUMAN | 0 | 0 | 0 | 0 | 0 | 1 | 0 | 0 | 0 | - |          |
| WDFY3_HUMAN | 0 | 0 | 0 | 0 | 0 | 0 | 0 | 0 | 1 | - | cyt      |
| WDR22_HUMAN | 0 | 0 | 0 | 0 | 1 | 0 | 0 | 0 | 0 | - |          |
| WDR87_HUMAN | 0 | 0 | 0 | 0 | 0 | 0 | 0 | 0 | 1 | - |          |
| WFDC3_HUMAN | 0 | 0 | 0 | 0 | 0 | 1 | 0 | 0 | 0 | - |          |
| WWP1_HUMAN  | 0 | 0 | 0 | 0 | 0 | 0 | 0 | 0 | 1 | - |          |

|             |   |   |   |   |   |   |   |   |   |   |          |
|-------------|---|---|---|---|---|---|---|---|---|---|----------|
| XCT_HUMAN   | 0 | 0 | 0 | 0 | 0 | 1 | 0 | 0 | 0 | - |          |
| XKR6_HUMAN  | 0 | 0 | 0 | 0 | 0 | 0 | 0 | 0 | 1 | - |          |
| YD002_HUMAN | 0 | 0 | 0 | 0 | 0 | 0 | 0 | 0 | 1 | - |          |
| YD012_HUMAN | 0 | 0 | 0 | 0 | 0 | 0 | 1 | 0 | 0 | - |          |
| YIF1A_HUMAN | 1 | 0 | 0 | 0 | 0 | 0 | 0 | 0 | 0 | - | gol, end |
| YIF1B_HUMAN | 1 | 0 | 0 | 0 | 0 | 0 | 0 | 0 | 0 | - |          |
| YJ005_HUMAN | 0 | 0 | 0 | 0 | 0 | 1 | 0 | 0 | 0 | - |          |
| YQ015_HUMAN | 0 | 0 | 0 | 0 | 0 | 1 | 0 | 0 | 0 | - |          |
| YRDC_HUMAN  | 0 | 0 | 0 | 0 | 0 | 0 | 0 | 0 | 1 | - |          |
| YV010_HUMAN | 0 | 0 | 0 | 0 | 0 | 1 | 0 | 0 | 0 | - |          |
| YV018_HUMAN | 0 | 0 | 0 | 0 | 0 | 1 | 0 | 0 | 0 | - |          |
| Z354A_HUMAN | 0 | 0 | 0 | 0 | 0 | 0 | 0 | 0 | 1 | - |          |
| ZBBX_HUMAN  | 0 | 0 | 0 | 0 | 0 | 0 | 0 | 0 | 1 | - |          |
| ZBED5_HUMAN | 0 | 0 | 0 | 0 | 1 | 0 | 0 | 0 | 0 | - |          |
| ZCH12_HUMAN | 1 | 0 | 0 | 0 | 0 | 0 | 0 | 0 | 0 | - |          |
| ZCHC4_HUMAN | 0 | 0 | 0 | 1 | 0 | 0 | 0 | 0 | 0 | - |          |
| ZEP2_HUMAN  | 0 | 0 | 0 | 0 | 0 | 0 | 0 | 0 | 1 | - | nuc      |
| ZFHX3_HUMAN | 0 | 0 | 0 | 0 | 0 | 1 | 0 | 0 | 0 | - | nuc      |
| ZN253_HUMAN | 0 | 0 | 0 | 0 | 0 | 0 | 0 | 0 | 1 | - |          |
| ZN271_HUMAN | 0 | 0 | 0 | 0 | 0 | 0 | 0 | 0 | 1 | - |          |
| ZN460_HUMAN | 0 | 0 | 0 | 0 | 0 | 0 | 0 | 0 | 1 | - |          |
| ZN532_HUMAN | 0 | 0 | 0 | 0 | 0 | 0 | 0 | 0 | 1 | - |          |
| ZN573_HUMAN | 0 | 0 | 0 | 0 | 0 | 0 | 0 | 0 | 1 | - |          |
| ZN692_HUMAN | 0 | 0 | 0 | 0 | 0 | 0 | 0 | 0 | 1 | - |          |
| ZN713_HUMAN | 0 | 0 | 1 | 0 | 0 | 0 | 0 | 0 | 0 | - |          |
| ZN844_HUMAN | 0 | 0 | 0 | 0 | 0 | 0 | 1 | 0 | 0 | - |          |
| ZNFX1_HUMAN | 0 | 0 | 0 | 0 | 0 | 0 | 0 | 0 | 1 | - |          |
| ZNT10_HUMAN | 0 | 0 | 0 | 0 | 0 | 1 | 0 | 0 | 0 | - |          |
| ZNT4_HUMAN  | 0 | 0 | 0 | 0 | 0 | 0 | 0 | 0 | 1 | - |          |
| ZY11B_HUMAN | 0 | 0 | 0 | 0 | 0 | 0 | 0 | 0 | 1 | - |          |

**Table S5.** Protein-protein interaction datasets used in the CRG-integrated PPI (Bossi, A., & Lehner, B. 2009)

| Dataset                    | Reference                                                                                                                                                                                                                                                                                                                                                                                                         |
|----------------------------|-------------------------------------------------------------------------------------------------------------------------------------------------------------------------------------------------------------------------------------------------------------------------------------------------------------------------------------------------------------------------------------------------------------------|
| BIND                       | Bader GD, Donaldson I, Wolting C, Ouellette BF, Pawson T, Hogue CW (2001) BIND—The Biomolecular Interaction Network Database. <i>Nucleic Acids Res</i> 29: 242–245                                                                                                                                                                                                                                                |
| BIOGRID                    | Stark C, Breitkreutz BJ, Reguly T, Boucher L, Breitkreutz A, Tyers M (2006) BioGRID: a general repository for interaction datasets. <i>Nucleic Acids Res</i> 34: D535–D539                                                                                                                                                                                                                                        |
| Bioverse                   | McDermott J, Guerquin M, Frazier Z, Chang AN, Samudrala R (2005) BIOVERSE: enhancements to the framework for structural, functional and contextual modeling of proteins and proteomes. <i>Nucleic Acids Res</i> 33: W324–W325                                                                                                                                                                                     |
| CCSB-HI1                   | Rual JF, Venkatesan K, Hao T, Hirozane-Kishikawa T, Dricot A, Li N, Berriz GF, Gibbons FD, Dreze M, Ayivi-Guedehoussou N, Klitgord N, Simon C, Boxem M, Milstein S, Rosenberg J, Goldberg DS, Zhang LV, Wong SL, Franklin G, Li S et al (2005) Towards a proteome-scale map of the human protein–protein interaction network. <i>Nature</i> 437: 1173–1178                                                        |
| Co-citation                | Ramani AK, Bunesco RC, Mooney RJ, Marcotte EM (2005) Consolidating the set of known human protein–protein interactions in preparation for large-scale mapping of the human interactome. <i>Genome Biol</i> 6: R40                                                                                                                                                                                                 |
| Co-expression conservation | Ramani AK, Li Z, Hart GT, Carlson MW, Boutz DR, Marcotte EM (2008) A map of human protein interactions derived from co-expression of human mRNAs and their orthologs. <i>Mol Syst Biol</i> 4: 180                                                                                                                                                                                                                 |
| CORUM                      | Ruepp A, Brauner B, Dunger-Kaltenbach I, Frishman G, Montrone C, Stransky M, Waegle B, Schmidt T, Doudieu ON, Stumpflen V, Mewes HW (2008) CORUM: the comprehensive resource of mammalian protein complexes. <i>Nucleic Acids Res</i> 36: D646–D650                                                                                                                                                               |
| DIP                        | Xenarios I, Salwinski L, Duan XJ, Higney P, Kim SM, Eisenberg D (2002) DIP, the Database of Interacting Proteins: a research tool for studying cellular networks of protein interactions. <i>Nucleic Acids Res</i> 30: 303–305                                                                                                                                                                                    |
| HPRD                       | Peri S, Navarro JD, Amanchy R, Kristiansen TZ, Jonnalagadda CK, Surendranath V, Niranjan V, Muthusamy B, Gandhi TK, Gronborg M, Ibarrola N, Deshpande N, Shanker K, Shivashankar HN, Rashmi BP, Ramya MA, Zhao Z, Chandrika KN, Padma N, Harsha HC et al (2003) Development of human protein reference database as an initial platform for approaching systems biology in humans. <i>Genome Res</i> 13: 2363–2371 |
| Intact                     | Kerrien S, Alam-Faruque Y, Aranda B, Bancarz I, Bridge A, Derow C, Dimmer E, Feuermann M, Friedrichsen A, Huntley R, Kohler C, Khadake J, Leroy C, Liban A, Lieftink C, Montecchi-Palazzi L, Orchard S, Risse J, Robbe K, Roehert B et al (2007) IntAct—open source resource for molecular interaction data. <i>Nucleic Acids Res</i> 35: D561–D565                                                               |
| IntNetDB                   | Xia K, Dong D, Han JD (2006) IntNetDB v1.0: an integrated protein–protein interaction network database generated by a probabilistic model. <i>BMC Bioinformatics</i> 7: 508                                                                                                                                                                                                                                       |
| MDC                        | Stelzl U, Worm U, Lalowski M, Haenig C, Brembeck FH, Goehler H, Stroedicke M, Zenkner M, Schoenherr A, Koeppen S, Timm J, Mintzlaff S, Abraham C, Bock N, Kietzmann S, Goedde A, Toksoz E, Droege A, Krobitsch S, Korn B et al (2005) A human protein–protein interaction network: a resource for annotating the proteome. <i>Cell</i> 122: 957–968                                                               |
| MINT                       | Persico M, Ceol A, Gavrilu C, Hoffmann R, Florio A, Cesareni G (2005) HomoMINT: an inferred human network based on orthology mapping of protein interactions discovered in model organisms. <i>BMC Bioinformatics</i> 6(Suppl 4): S21                                                                                                                                                                             |
| MIPS                       | Pagel P, Kovac S, Oesterheld M, Brauner B, Dunger-Kaltenbach I, Frishman G, Montrone C, Mark P, Stumpflen V, Mewes HW, Ruepp A, Frishman D (2005) The MIPS mammalian protein–protein interaction database. <i>Bioinformatics</i> 21: 832–834                                                                                                                                                                      |
| OPHID                      | Brown KR, Jurisica I (2005) Online predicted human interaction database. <i>Bioinformatics</i> 21: 2076–2082                                                                                                                                                                                                                                                                                                      |
| Ottawa                     | Ewing RM, Chu P, Elisma F, Li H, Taylor P, Climie S, McBroom- Cerajewski L, Robinson MD, O'Connor L, Li M, Taylor R, Dharsee M, Ho Y, Heilbut A, Moore L, Zhang S, Ornatsky O, Bukhman YV, Ethier M, Sheng Y et al (2007) Large-scale mapping of human protein–protein interactions by mass spectrometry. <i>Mol Syst Biol</i> 3: 89                                                                              |
| PC/Ataxia                  | Lim J, Hao T, Shaw C, Patel AJ, Szabo G, Rual JF, Fisk CJ, Li N, Smolyar A, Hill DE, Barabasi AL, Vidal M, Zoghbi HY (2006) A protein–protein interaction network for human inherited ataxias and disorders of Purkinje cell degeneration. <i>Cell</i> 125: 801–814                                                                                                                                               |
| Reactome                   | Vastrik I, D'Eustachio P, Schmidt E, Joshi-Tope G, Gopinath G, Croft D, de Bono B, Gillespie M, Jassal B, Lewis S, Matthews L, Wu G, Birney E, Stein L (2007) Reactome: a knowledge base of biologic pathways and processes. <i>Genome Biol</i> 8: R39                                                                                                                                                            |
| Sanger                     | Lehner B, Fraser AG (2004) A first-draft human protein-interaction map. <i>Genome Biol</i> 5: R63                                                                                                                                                                                                                                                                                                                 |
| Transcription complexes    | Jeronimo C, Forget D, Bouchard A, Li Q, Chua G, Poitras C, Therien C, Bergeron D, Bourassa S, Greenblatt J, Chabot B, Poirier GG, Hughes TR, Blanchette M, Price DH, Coulombe B (2007) Systematic analysis of the protein interaction network for the human transcription machinery reveals the identity of the 7SK capping enzyme. <i>Mol Cell</i> 27: 262–274                                                   |
| Unilever                   | <a href="http://www.cytoscape.org/cgi-bin/moin.cgi/Data_Sets">http://www.cytoscape.org/cgi-bin/moin.cgi/Data_Sets</a>                                                                                                                                                                                                                                                                                             |

**Table S6.** Independent test results for distinguishing OMM proteins from MM and IMM proteins using network position.

| Swissprot_ID | Sub-mitochondrial localization | Network Position | Distinguishing OMM vs IMM and MM | Related Function                           |
|--------------|--------------------------------|------------------|----------------------------------|--------------------------------------------|
| NLRX1_HUMAN  | OMM                            | 0.921            | O                                | Antiviral signaling                        |
| TOM6_HUMAN   | OMM                            | 0.953            | O                                | Preprotein translocase complex             |
| MUL1_HUMAN   | OMM                            | 0.915            | O                                | Control of mitochondrial morphology        |
| MFF_HUMAN    | OMM                            | 0.935            | O                                | Mitochondrial fission                      |
| SNN_HUMAN    | OMM                            | 0.744            | O                                | Response to abiotic stimulus               |
| PINK1_HUMAN  | OMM                            | 0.625            | O                                | Protect against mitochondrial dysfunction  |
| PGAM5_HUMAN  | OMM                            | 0.662            | O                                | Regulator of mitochondrial dynamics        |
| UBP30_HUMAN  | OMM                            | 0.560            | O                                | Maintenance of mitochondrial morphology    |
| EXOG_HUMAN   | IMM                            | 0.870            | X                                | Endo/exonuclease                           |
| LETM1_HUMAN  | IMM                            | 0.858            | X                                | Mitochondrial tubular networks and cristae |
| TPC_HUMAN    | IMM                            | 0.420            | O                                | Uptake ThPP into mitochondria              |
| COQ7_HUMAN   | IMM                            | 0.299            | O                                | Ubiquinone biosynthesis                    |
| CT007_HUMAN  | IMM                            | 0.298            | O                                | Putative methyltransferase                 |
| COQ4_HUMAN   | IMM                            | 0.213            | O                                | Ubiquinone biosynthesis                    |
| COX8A_HUMAN  | IMM                            | 0.153            | O                                | Cytochrome c oxidase                       |
| COX8C_HUMAN  | IMM                            | 0.144            | O                                | Cytochrome c oxidase                       |
| SIRT4_HUMAN  | MM                             | 0.690            | X                                | GLUD1 enzyme activity, Insulin secretion   |
| DHB8_HUMAN   | MM                             | 0.437            | O                                | Estrogen biosynthesis                      |
| CLPP_HUMAN   | MM                             | 0.379            | O                                | Clp protease                               |
| MIPEP_HUMAN  | MM                             | 0.366            | O                                | Mitochondrial intermediate peptidase       |
| MCCB_HUMAN   | MM                             | 0.113            | O                                | Leucine degradation                        |
| CBR4_HUMAN   | MM                             | 0.093            | O                                | Biosynthesis of fatty acids                |
| SCOT1_HUMAN  | MM                             | 0.080            | O                                | Ketone body catabolism                     |
| ACS2L_HUMAN  | MM                             | 0.015            | O                                | Maintaining normal body temperature        |
